# Supplementary material for: Assessment of the ground spin state of iron(i) complexes: insights from DFT predictive models
Source: Royal Society of Chemistry journal article supplement (doi:10.1039/c7nj04816e), 2018-01-01
Supplement: c7nj04816e1.pdf [file c7nj04816e1.pdf]

## Supporting Information

### Assessment of the ground spin state of iron(I) complexes : insights from DFT predictive models

Lidie Rousseau,<sup>a</sup> Eric Brémond,<sup>b</sup> and Guillaume Lefèvre<sup>a\*</sup>

<sup>a</sup> NIMBE, CEA, CNRS, Université Paris-Saclay, Gif-sur-Yvette, France.

<sup>b</sup> Univ. Paris Diderot, Sorbonne Paris Cité, ITODYS, UMR CNRS 7086, 15 rue J.-A. de Baïf, F-75013 Paris, France.

- 1) General considerations (page S2)
- 2) DFT-computed structures (page S3)
- 3) Comparison between metric parameters of experimental and computed structures (page S73)
- 4) Analysis of  $\alpha/\beta$  population for complexes  $^{24}\text{Me}$  and  $^{21}$  upon arene decoordination (page S75)
- 5) Computation of Mössbauer isomer shifts (page S76)

## 1) General considerations

All DFT computations at the OPBE level were performed using Gaussian09 version D.01<sup>1a</sup>, except for structures which were optimized at the OPBE-D3(BJ) level, for which Gaussian09 version E.01<sup>1b</sup> was used, and computation of Mössbauer isomer shifts, which were performed using the ORCA software (see section 5 of this SI file). Unless specified otherwise, all structures were characterized as minima by frequency analysis (no imaginary frequency), and were optimized without geometrical constraint except for **<sup>2</sup>12**, in which Fe was forced to keep a tetrahedral environment (no tetrahedral geometry for the doublet state could be reached otherwise).

Unrestricted DFT methods were applied. OPBE functional was chosen, associated with Ahlrichs's triple-zeta basis set (def2-TZVP)<sup>2</sup> for iron and 6-31G\* for other atoms (C, H, N, O, P, Si)<sup>3</sup> unless specified otherwise (several structures were computed using the def2-TZVP basis set on all atoms, and are given at the end of the section 2 of this SI file). For all the computed structures, the stability of the optimized wavefunction was checked using the *stable=opt* command implemented in Gaussian. All structures computed in this work appeared to be stable (with no internal instability).

## 2) DFT-computed structures

*Spin multiplicities are superscripted; the structures of the computed complexes are displayed in the article, Scheme 2.*

|    | <sup>4</sup> 1 |              |              |
|----|----------------|--------------|--------------|
| Fe | -0.144596000   | 0.025249000  | -0.427838000 |
| C  | 1.205882000    | 0.133610000  | 2.374237000  |
| C  | -1.362110000   | 0.129454000  | 2.423433000  |
| C  | -0.067413000   | 0.176727000  | 2.973195000  |
| H  | -0.047298000   | 0.233114000  | 4.061411000  |
| C  | -0.069385000   | -1.415882000 | -2.105458000 |
| C  | -1.351469000   | -0.805044000 | -2.165667000 |
| C  | 1.087867000    | -0.597966000 | -2.200610000 |
| C  | -1.470412000   | 0.598708000  | -2.195922000 |
| H  | -2.251562000   | -1.412659000 | -2.143468000 |
| C  | 0.968387000    | 0.810520000  | -2.190024000 |
| H  | 2.075844000    | -1.050548000 | -2.177020000 |
| C  | -0.314761000   | 1.420775000  | -2.123528000 |
| H  | -2.461107000   | 1.042517000  | -2.168889000 |
| H  | 1.864380000    | 1.425564000  | -2.183807000 |
| H  | -0.406194000   | 2.505304000  | -2.124918000 |
| N  | 1.415069000    | 0.056037000  | 1.058287000  |
| N  | -1.640836000   | 0.068869000  | 1.111705000  |
| H  | 0.023928000    | -2.500441000 | -2.092738000 |
| C  | -3.011735000   | 0.023690000  | 0.709640000  |
| C  | -3.700041000   | 1.235390000  | 0.392638000  |
| C  | -3.685707000   | -1.228617000 | 0.582510000  |
| C  | -5.013164000   | 1.155986000  | -0.096082000 |
| C  | -4.994688000   | -1.241002000 | 0.075597000  |
| C  | -5.656314000   | -0.066904000 | -0.275699000 |
| H  | -5.548850000   | 2.075022000  | -0.336597000 |
| H  | -5.515242000   | -2.193981000 | -0.029615000 |
| H  | -6.675047000   | -0.102454000 | -0.665795000 |
| C  | 2.749247000    | -0.006955000 | 0.561969000  |
| C  | 3.364745000    | -1.276667000 | 0.319783000  |
| C  | 3.438909000    | 1.192009000  | 0.194049000  |
| C  | 4.575657000    | -1.307826000 | -0.395870000 |
| C  | 4.645575000    | 1.077001000  | -0.520278000 |
| C  | 5.208736000    | -0.152794000 | -0.840444000 |
| H  | 5.027763000    | -2.278551000 | -0.612763000 |
| H  | 5.152879000    | 1.991584000  | -0.835908000 |
| H  | 6.132891000    | -0.210057000 | -1.417738000 |
| C  | -3.081703000   | 2.613609000  | 0.625128000  |
| H  | -2.004049000   | 2.462409000  | 0.772517000  |
| C  | -3.074230000   | -2.548295000 | 1.051964000  |
| H  | -2.050814000   | -2.335308000 | 1.385445000  |
| C  | 2.917164000    | -2.673950000 | 0.793354000  |
| H  | 3.168610000    | -3.336775000 | -0.053041000 |
| C  | 3.081853000    | 2.655974000  | 0.524953000  |
| H  | 3.353443000    | 3.210740000  | -0.390438000 |

|                                              |              |              |              |
|----------------------------------------------|--------------|--------------|--------------|
| C                                            | 2.353854000  | 0.176363000  | 3.368780000  |
| H                                            | 2.271169000  | -0.657594000 | 4.079543000  |
| H                                            | 3.335510000  | 0.124418000  | 2.890898000  |
| H                                            | 2.306525000  | 1.100620000  | 3.961466000  |
| C                                            | -2.456747000 | 0.126158000  | 3.478742000  |
| H                                            | -2.316504000 | 0.967019000  | 4.171226000  |
| H                                            | -3.463904000 | 0.186179000  | 3.059100000  |
| H                                            | -2.390877000 | -0.791131000 | 4.080163000  |
| C                                            | -3.847210000 | -3.123624000 | 2.253561000  |
| H                                            | -3.958868000 | -2.392354000 | 3.062245000  |
| H                                            | -4.856291000 | -3.448977000 | 1.962317000  |
| H                                            | -3.322001000 | -4.000942000 | 2.659888000  |
| C                                            | -2.982352000 | -3.621252000 | -0.043979000 |
| H                                            | -2.375425000 | -3.290548000 | -0.893329000 |
| H                                            | -2.516042000 | -4.531552000 | 0.360898000  |
| H                                            | -3.972509000 | -3.905756000 | -0.427353000 |
| C                                            | -3.639743000 | 3.273775000  | 1.898963000  |
| H                                            | -4.717910000 | 3.468038000  | 1.801698000  |
| H                                            | -3.493483000 | 2.650567000  | 2.787017000  |
| H                                            | -3.141575000 | 4.238239000  | 2.079608000  |
| C                                            | -3.257552000 | 3.589089000  | -0.550040000 |
| H                                            | -2.933844000 | 3.161830000  | -1.505917000 |
| H                                            | -4.301956000 | 3.910768000  | -0.668861000 |
| H                                            | -2.663116000 | 4.497015000  | -0.371038000 |
| C                                            | 4.019559000  | 3.189635000  | 1.627312000  |
| H                                            | 3.813936000  | 2.710386000  | 2.592667000  |
| H                                            | 5.076801000  | 3.015895000  | 1.387350000  |
| H                                            | 3.875304000  | 4.273031000  | 1.754732000  |
| C                                            | 1.642088000  | 3.069848000  | 0.837121000  |
| H                                            | 0.931106000  | 2.690471000  | 0.097456000  |
| H                                            | 1.303446000  | 2.736232000  | 1.823566000  |
| H                                            | 1.586949000  | 4.169460000  | 0.825906000  |
| C                                            | 3.803279000  | -3.141177000 | 1.966098000  |
| H                                            | 4.872532000  | -3.050649000 | 1.733454000  |
| H                                            | 3.608514000  | -2.554425000 | 2.872732000  |
| H                                            | 3.595952000  | -4.196214000 | 2.200209000  |
| C                                            | 1.449798000  | -2.965543000 | 1.113594000  |
| H                                            | 1.117185000  | -2.507022000 | 2.050560000  |
| H                                            | 0.777537000  | -2.625446000 | 0.320067000  |
| H                                            | 1.326156000  | -4.054683000 | 1.217117000  |
| Sum of electronic and thermal Energies=      |              |              | -2734.111994 |
| Sum of electronic and thermal Enthalpies=    |              |              | -2734.111049 |
| Sum of electronic and thermal Free Energies= |              |              | -2734.229150 |
| Lowest vibration frequencies (/cm^-1):       | 10.3939      | 30.5361      | 33.9313      |

<sup>2</sup>1

|    |              |              |              |
|----|--------------|--------------|--------------|
| Fe | -0.131613000 | -0.007860000 | -0.413731000 |
| C  | 1.137742000  | 0.069663000  | 2.308109000  |
| C  | -1.391435000 | 0.080134000  | 2.300853000  |
| C  | -0.128456000 | 0.096184000  | 2.905954000  |
| H  | -0.132536000 | 0.132836000  | 3.994453000  |

|   |              |              |              |
|---|--------------|--------------|--------------|
| C | -0.142786000 | -1.489309000 | -1.921554000 |
| C | -1.349720000 | -0.754046000 | -1.958903000 |
| C | 1.074912000  | -0.770010000 | -1.959278000 |
| C | -1.341702000 | 0.661866000  | -1.999370000 |
| H | -2.308012000 | -1.258373000 | -1.878894000 |
| C | 1.082823000  | 0.648862000  | -2.002934000 |
| H | 2.022403000  | -1.297136000 | -1.878218000 |
| C | -0.126137000 | 1.383604000  | -2.007223000 |
| H | -2.294369000 | 1.180394000  | -1.949576000 |
| H | 2.036150000  | 1.169589000  | -1.954513000 |
| H | -0.118536000 | 2.473174000  | -2.023653000 |
| N | 1.335364000  | 0.024355000  | 0.986184000  |
| N | -1.597696000 | 0.036676000  | 0.973276000  |
| H | -0.148350000 | -2.577931000 | -1.873743000 |
| C | -2.974966000 | 0.024365000  | 0.555257000  |
| C | -3.662789000 | 1.253921000  | 0.318456000  |
| C | -3.661435000 | -1.217492000 | 0.389880000  |
| C | -4.990898000 | 1.204544000  | -0.134442000 |
| C | -4.989651000 | -1.196446000 | -0.064770000 |
| C | -5.652060000 | -0.003274000 | -0.341137000 |
| H | -5.525392000 | 2.137651000  | -0.316597000 |
| H | -5.522535000 | -2.139243000 | -0.193232000 |
| H | -6.684262000 | -0.013994000 | -0.695561000 |
| C | 2.700102000  | 0.002196000  | 0.541266000  |
| C | 3.368724000  | -1.244390000 | 0.328091000  |
| C | 3.382219000  | 1.226158000  | 0.253498000  |
| C | 4.612403000  | -1.228788000 | -0.331035000 |
| C | 4.626023000  | 1.157900000  | -0.402043000 |
| C | 5.232230000  | -0.049592000 | -0.725734000 |
| H | 5.100888000  | -2.182123000 | -0.544494000 |
| H | 5.124794000  | 2.091152000  | -0.672611000 |
| H | 6.182221000  | -0.071126000 | -1.262007000 |
| C | -3.046646000 | 2.625380000  | 0.603905000  |
| H | -1.981045000 | 2.469552000  | 0.815129000  |
| C | -3.040521000 | -2.568234000 | 0.751496000  |
| H | -1.973633000 | -2.397330000 | 0.943587000  |
| C | 2.950453000  | -2.665214000 | 0.763935000  |
| H | 3.180444000  | -3.295511000 | -0.113268000 |
| C | 2.975944000  | 2.675263000  | 0.597953000  |
| H | 3.205384000  | 3.244638000  | -0.320122000 |
| C | 2.286190000  | 0.098531000  | 3.301495000  |
| H | 2.204399000  | -0.751201000 | 3.993439000  |
| H | 3.271238000  | 0.064171000  | 2.830997000  |
| H | 2.228436000  | 1.009454000  | 3.913413000  |
| C | -2.528441000 | 0.116616000  | 3.309066000  |
| H | -3.523306000 | 0.109898000  | 2.859026000  |
| H | -2.448747000 | -0.743605000 | 3.987414000  |
| H | -2.436887000 | 1.014460000  | 3.935148000  |
| C | -3.663833000 | -3.147688000 | 2.035101000  |
| H | -3.598846000 | -2.455732000 | 2.880478000  |
| H | -4.726062000 | -3.389303000 | 1.884889000  |

|                                                    |              |              |                                               |
|----------------------------------------------------|--------------|--------------|-----------------------------------------------|
| H                                                  | -3.148826000 | -4.077187000 | 2.320042000                                   |
| C                                                  | -3.149654000 | -3.629776000 | -0.356199000                                  |
| H                                                  | -2.730543000 | -3.295360000 | -1.311618000                                  |
| H                                                  | -2.603932000 | -4.535731000 | -0.054087000                                  |
| H                                                  | -4.191356000 | -3.929578000 | -0.538388000                                  |
| C                                                  | -3.682901000 | 3.277827000  | 1.845385000                                   |
| H                                                  | -4.743465000 | 3.509914000  | 1.670677000                                   |
| H                                                  | -3.627018000 | 2.635141000  | 2.729579000                                   |
| H                                                  | -3.170951000 | 4.222421000  | 2.082343000                                   |
| C                                                  | -3.147204000 | 3.618312000  | -0.566500000                                  |
| H                                                  | -2.714412000 | 3.229586000  | -1.494768000                                  |
| H                                                  | -4.187748000 | 3.901221000  | -0.779677000                                  |
| H                                                  | -2.608914000 | 4.543488000  | -0.313193000                                  |
| C                                                  | 3.913998000  | 3.236439000  | 1.687244000                                   |
| H                                                  | 3.747235000  | 2.736117000  | 2.649924000                                   |
| H                                                  | 4.973923000  | 3.115115000  | 1.429122000                                   |
| H                                                  | 3.722724000  | 4.310306000  | 1.831560000                                   |
| C                                                  | 1.531838000  | 3.033432000  | 0.955380000                                   |
| H                                                  | 0.808730000  | 2.607955000  | 0.254847000                                   |
| H                                                  | 1.250492000  | 2.702544000  | 1.960917000                                   |
| H                                                  | 1.431188000  | 4.129512000  | 0.932249000                                   |
| C                                                  | 3.879701000  | -3.159561000 | 1.892704000                                   |
| H                                                  | 4.941581000  | -3.055592000 | 1.634875000                                   |
| H                                                  | 3.707054000  | -2.601232000 | 2.821939000                                   |
| H                                                  | 3.685612000  | -4.222277000 | 2.101365000                                   |
| C                                                  | 1.502341000  | -2.989461000 | 1.136122000                                   |
| H                                                  | 1.213287000  | -2.578566000 | 2.109370000                                   |
| H                                                  | 0.788057000  | -2.619694000 | 0.396284000                                   |
| H                                                  | 1.397345000  | -4.083586000 | 1.198525000                                   |
| Sum of electronic and thermal Energies=            |              |              | -2734.118884                                  |
| Sum of electronic and thermal Enthalpies=          |              |              | -2734.117939                                  |
| Sum of electronic and thermal Free Energies=       |              |              | -2734.229786                                  |
| Lowest vibration frequencies (/cm <sup>-1</sup> ): |              |              | 18.8364            29.4327            38.7286 |

**41'**

|    |              |              |              |
|----|--------------|--------------|--------------|
| Fe | -0.003950000 | -0.126077000 | -0.563768000 |
| C  | 1.246040000  | -0.075917000 | 2.232766000  |
| C  | -1.251550000 | -0.072468000 | 2.231075000  |
| C  | -0.003344000 | -0.118742000 | 2.861047000  |
| H  | -0.004001000 | -0.151033000 | 3.949162000  |
| C  | 0.079910000  | -1.699525000 | -2.070418000 |
| C  | -1.183765000 | -1.058054000 | -2.211067000 |
| C  | 1.266327000  | -0.927278000 | -2.218156000 |
| C  | -1.258886000 | 0.345659000  | -2.358446000 |
| H  | -2.100099000 | -1.638845000 | -2.131118000 |
| C  | 1.192617000  | 0.478982000  | -2.342043000 |
| H  | 2.239290000  | -1.405526000 | -2.130371000 |
| C  | -0.072693000 | 1.132632000  | -2.343349000 |
| H  | -2.231354000 | 0.832926000  | -2.376861000 |
| H  | 2.107664000  | 1.066786000  | -2.360363000 |
| H  | -0.130875000 | 2.216328000  | -2.432781000 |

|                                                     |              |              |                                   |
|-----------------------------------------------------|--------------|--------------|-----------------------------------|
| N                                                   | 1.486596000  | -0.031824000 | 0.922437000                       |
| N                                                   | -1.489802000 | -0.027267000 | 0.920046000                       |
| H                                                   | 0.137896000  | -2.780261000 | -1.948631000                      |
| H                                                   | 2.120529000  | -0.061579000 | 2.897301000                       |
| H                                                   | -2.127219000 | -0.057466000 | 2.893908000                       |
| C                                                   | -2.868375000 | 0.069010000  | 0.571299000                       |
| C                                                   | -3.436376000 | 1.344697000  | 0.327395000                       |
| C                                                   | -3.658284000 | -1.102791000 | 0.464073000                       |
| C                                                   | -4.780340000 | 1.420624000  | -0.066171000                      |
| C                                                   | -4.998936000 | -0.976281000 | 0.067723000                       |
| C                                                   | -5.559463000 | 0.271192000  | -0.206172000                      |
| H                                                   | -5.221494000 | 2.401080000  | -0.256913000                      |
| H                                                   | -5.611504000 | -1.876005000 | -0.020667000                      |
| H                                                   | -6.602091000 | 0.348770000  | -0.517932000                      |
| C                                                   | 2.866184000  | 0.064974000  | 0.578048000                       |
| C                                                   | 3.653753000  | -1.107414000 | 0.460739000                       |
| C                                                   | 3.437458000  | 1.341424000  | 0.347281000                       |
| C                                                   | 4.995272000  | -0.980438000 | 0.066822000                       |
| C                                                   | 4.782455000  | 1.418148000  | -0.042433000                      |
| C                                                   | 5.559297000  | 0.268517000  | -0.192801000                      |
| H                                                   | 5.605430000  | -1.880909000 | -0.030818000                      |
| H                                                   | 5.225974000  | 2.399465000  | -0.222830000                      |
| H                                                   | 6.602578000  | 0.346681000  | -0.502242000                      |
| C                                                   | -2.631822000 | 2.601683000  | 0.524492000                       |
| H                                                   | -2.447887000 | 2.792595000  | 1.592626000                       |
| H                                                   | -1.645000000 | 2.533266000  | 0.049069000                       |
| H                                                   | -3.157406000 | 3.475056000  | 0.117048000                       |
| C                                                   | -3.101249000 | -2.458818000 | 0.810976000                       |
| H                                                   | -2.065283000 | -2.577252000 | 0.470869000                       |
| H                                                   | -3.092108000 | -2.617858000 | 1.900390000                       |
| H                                                   | -3.710756000 | -3.259450000 | 0.371446000                       |
| C                                                   | 3.090054000  | -2.465893000 | 0.786214000                       |
| H                                                   | 3.075988000  | -2.641369000 | 1.873146000                       |
| H                                                   | 2.054824000  | -2.573393000 | 0.440587000                       |
| H                                                   | 3.696921000  | -3.262772000 | 0.336279000                       |
| C                                                   | 2.636058000  | 2.598401000  | 0.556979000                       |
| H                                                   | 1.646951000  | 2.534927000  | 0.085598000                       |
| H                                                   | 2.457558000  | 2.782034000  | 1.627325000                       |
| H                                                   | 3.161498000  | 3.473761000  | 0.153634000                       |
| Sum of electronic and thermal Energies=             |              |              | -2341.507308                      |
| Sum of electronic and thermal Enthalpies=           |              |              | -2341.506363                      |
| Sum of electronic and thermal Free Energies=        |              |              | -2341.596838                      |
| Lowest vibration frequencies (/cm <sup>-1</sup> ) : |              |              | 12.6406      38.6255      45.7711 |

21'

|    |              |              |              |
|----|--------------|--------------|--------------|
| Fe | -0.000778000 | -0.104276000 | -0.548556000 |
| C  | 1.227106000  | -0.000487000 | 2.140511000  |
| C  | -1.224648000 | -0.007339000 | 2.143260000  |
| C  | 0.001999000  | -0.015153000 | 2.804055000  |
| H  | 0.003263000  | -0.004874000 | 3.891833000  |
| C  | 0.037359000  | -1.652683000 | -1.964026000 |

|                                           |              |              |              |
|-------------------------------------------|--------------|--------------|--------------|
| C                                         | -1.198087000 | -0.963553000 | -2.039454000 |
| C                                         | 1.231548000  | -0.893522000 | -2.048017000 |
| C                                         | -1.237065000 | 0.451339000  | -2.148996000 |
| H                                         | -2.135036000 | -1.505638000 | -1.926328000 |
| C                                         | 1.193175000  | 0.521288000  | -2.156505000 |
| H                                         | 2.197173000  | -1.383280000 | -1.937963000 |
| C                                         | -0.042434000 | 1.213195000  | -2.186342000 |
| H                                         | -2.202661000 | 0.952821000  | -2.114642000 |
| H                                         | 2.130296000  | 1.074860000  | -2.131632000 |
| H                                         | -0.074261000 | 2.301594000  | -2.246577000 |
| N                                         | 1.415066000  | -0.013133000 | 0.819151000  |
| N                                         | -1.414581000 | -0.021730000 | 0.822246000  |
| H                                         | 0.069046000  | -2.736837000 | -1.851354000 |
| H                                         | 2.130517000  | 0.032240000  | 2.760600000  |
| H                                         | -2.127091000 | 0.020352000  | 2.764931000  |
| C                                         | -2.806581000 | 0.038520000  | 0.478656000  |
| C                                         | -3.417651000 | 1.301083000  | 0.279950000  |
| C                                         | -3.567298000 | -1.152576000 | 0.395921000  |
| C                                         | -4.776108000 | 1.343491000  | -0.068117000 |
| C                                         | -4.923632000 | -1.059866000 | 0.043903000  |
| C                                         | -5.525921000 | 0.173955000  | -0.198986000 |
| H                                         | -5.250829000 | 2.313543000  | -0.229673000 |
| H                                         | -5.513845000 | -1.975613000 | -0.031660000 |
| H                                         | -6.579704000 | 0.225406000  | -0.477729000 |
| C                                         | 2.806679000  | 0.052573000  | 0.475191000  |
| C                                         | 3.571134000  | -1.136435000 | 0.394724000  |
| C                                         | 3.414254000  | 1.316619000  | 0.277366000  |
| C                                         | 4.927698000  | -1.040337000 | 0.045624000  |
| C                                         | 4.773098000  | 1.362492000  | -0.069615000 |
| C                                         | 5.526673000  | 0.195234000  | -0.197630000 |
| H                                         | 5.520766000  | -1.954389000 | -0.027328000 |
| H                                         | 5.245480000  | 2.333774000  | -0.230700000 |
| H                                         | 6.580935000  | 0.249558000  | -0.473945000 |
| C                                         | -2.648705000 | 2.579077000  | 0.483712000  |
| H                                         | -2.529324000 | 2.799817000  | 1.555787000  |
| H                                         | -1.637042000 | 2.515691000  | 0.065250000  |
| H                                         | -3.169969000 | 3.431210000  | 0.028117000  |
| C                                         | -2.968806000 | -2.493892000 | 0.730512000  |
| H                                         | -1.906866000 | -2.546287000 | 0.465163000  |
| H                                         | -3.035647000 | -2.692655000 | 1.811897000  |
| H                                         | -3.504601000 | -3.305065000 | 0.219362000  |
| C                                         | 2.973184000  | -2.478330000 | 0.726945000  |
| H                                         | 3.000771000  | -2.661515000 | 1.812763000  |
| H                                         | 1.921872000  | -2.544385000 | 0.424398000  |
| H                                         | 3.534151000  | -3.291198000 | 0.246811000  |
| C                                         | 2.643640000  | 2.593291000  | 0.484304000  |
| H                                         | 1.627988000  | 2.526666000  | 0.076323000  |
| H                                         | 2.535152000  | 2.817183000  | 1.556956000  |
| H                                         | 3.158362000  | 3.445287000  | 0.021004000  |
| Sum of electronic and thermal Energies=   |              |              | -2341.521324 |
| Sum of electronic and thermal Enthalpies= |              |              | -2341.520380 |



Sum of electronic and thermal Free Energies= -2341.605978  
 Lowest vibration frequencies (/cm<sup>-1</sup>) : 13.8576 39.9980 51.2781

42

|    |              |              |              |
|----|--------------|--------------|--------------|
| Fe | 0.065622000  | -0.955186000 | 0.159139000  |
| C  | -1.367713000 | -3.593600000 | -0.072704000 |
| C  | 1.194515000  | -3.715868000 | -0.170941000 |
| C  | -0.103043000 | -4.219399000 | 0.030589000  |
| H  | -0.151187000 | -5.300322000 | 0.157276000  |
| N  | -1.558741000 | -2.271516000 | -0.143121000 |
| N  | 1.458869000  | -2.415204000 | -0.352619000 |
| C  | 2.734563000  | -2.016774000 | -0.869943000 |
| C  | 2.934257000  | -2.008881000 | -2.284470000 |
| C  | 3.783629000  | -1.591770000 | -0.003624000 |
| C  | 4.166576000  | -1.568403000 | -2.787412000 |
| C  | 4.991112000  | -1.156176000 | -0.571355000 |
| C  | 5.190645000  | -1.137661000 | -1.948030000 |
| H  | 4.329294000  | -1.564894000 | -3.865579000 |
| H  | 5.798244000  | -0.831063000 | 0.085743000  |
| H  | 6.139450000  | -0.795484000 | -2.364575000 |
| C  | -2.902756000 | -1.777657000 | -0.224728000 |
| C  | -3.694380000 | -1.631757000 | 0.954420000  |
| C  | -3.430220000 | -1.394878000 | -1.489581000 |
| C  | -4.999423000 | -1.132415000 | 0.823092000  |
| C  | -4.743047000 | -0.904867000 | -1.553626000 |
| C  | -5.530428000 | -0.774873000 | -0.413163000 |
| H  | -5.617105000 | -1.024215000 | 1.715427000  |
| H  | -5.159204000 | -0.623673000 | -2.521626000 |
| H  | -6.550525000 | -0.394182000 | -0.486140000 |
| C  | 1.876561000  | -2.486540000 | -3.275159000 |
| H  | 0.952341000  | -2.663542000 | -2.711237000 |
| C  | 3.677059000  | -1.622076000 | 1.516461000  |
| H  | 2.663461000  | -1.957282000 | 1.768068000  |
| C  | -3.201988000 | -1.995956000 | 2.353890000  |
| H  | -2.149333000 | -2.295384000 | 2.270913000  |
| C  | -2.627840000 | -1.509932000 | -2.779813000 |
| H  | -1.613732000 | -1.824371000 | -2.503688000 |
| C  | 2.294773000  | -4.760440000 | -0.174555000 |
| H  | 3.239224000  | -4.376531000 | -0.569146000 |
| H  | 2.472287000  | -5.102100000 | 0.856087000  |
| H  | 2.001162000  | -5.641199000 | -0.759172000 |
| C  | -2.520647000 | -4.576781000 | -0.169449000 |
| H  | -3.501972000 | -4.101243000 | -0.109760000 |
| H  | -2.459746000 | -5.108583000 | -1.130108000 |
| H  | -2.444676000 | -5.335596000 | 0.620182000  |
| C  | -2.506472000 | -0.160709000 | -3.505812000 |
| H  | -3.478922000 | 0.201696000  | -3.867289000 |
| H  | -2.087606000 | 0.613170000  | -2.849640000 |
| H  | -1.848114000 | -0.255888000 | -4.380843000 |
| C  | -3.200184000 | -2.582913000 | -3.720222000 |
| H  | -4.213391000 | -2.324372000 | -4.059689000 |

|                                                     |              |              |                                                                   |
|-----------------------------------------------------|--------------|--------------|-------------------------------------------------------------------|
| H                                                   | -2.567486000 | -2.686961000 | -4.614195000                                                      |
| H                                                   | -3.255036000 | -3.563615000 | -3.230376000                                                      |
| C                                                   | 1.560326000  | -1.440130000 | -4.355602000                                                      |
| H                                                   | 1.277187000  | -0.475170000 | -3.918653000                                                      |
| H                                                   | 2.415572000  | -1.264884000 | -5.022995000                                                      |
| H                                                   | 0.727337000  | -1.787615000 | -4.983774000                                                      |
| C                                                   | 2.276900000  | -3.817559000 | -3.934478000                                                      |
| H                                                   | 3.180726000  | -3.702742000 | -4.550121000                                                      |
| H                                                   | 2.479252000  | -4.598495000 | -3.191638000                                                      |
| H                                                   | 1.470531000  | -4.176977000 | -4.591015000                                                      |
| C                                                   | 3.879000000  | -0.231101000 | 2.139210000                                                       |
| H                                                   | 3.682632000  | -0.263833000 | 3.220365000                                                       |
| H                                                   | 4.908464000  | 0.128346000  | 2.002671000                                                       |
| H                                                   | 3.206943000  | 0.513927000  | 1.694892000                                                       |
| C                                                   | 4.653033000  | -2.631216000 | 2.145358000                                                       |
| H                                                   | 5.699972000  | -2.339263000 | 1.981229000                                                       |
| H                                                   | 4.492651000  | -2.687604000 | 3.232233000                                                       |
| H                                                   | 4.521511000  | -3.639028000 | 1.732166000                                                       |
| C                                                   | -3.971646000 | -3.183193000 | 2.958984000                                                       |
| H                                                   | -3.928940000 | -4.075275000 | 2.323864000                                                       |
| H                                                   | -3.547873000 | -3.447531000 | 3.939042000                                                       |
| H                                                   | -5.031638000 | -2.936442000 | 3.114151000                                                       |
| C                                                   | -3.264558000 | -0.803050000 | 3.323210000                                                       |
| H                                                   | -2.792998000 | -1.069987000 | 4.280077000                                                       |
| H                                                   | -2.747878000 | 0.078139000  | 2.927718000                                                       |
| H                                                   | -4.301078000 | -0.509259000 | 3.540155000                                                       |
| C                                                   | 0.774871000  | 0.431296000  | -0.907954000                                                      |
| C                                                   | 0.355216000  | -0.626191000 | 1.971389000                                                       |
| C                                                   | -1.312454000 | 0.560869000  | 0.432220000                                                       |
| O                                                   | 1.203902000  | 1.313957000  | -1.529196000                                                      |
| O                                                   | -1.580046000 | 1.666291000  | 0.676642000                                                       |
| O                                                   | 0.434523000  | -0.447877000 | 3.118571000                                                       |
| Sum of electronic and thermal Energies=             |              |              | -2841.895063                                                      |
| Sum of electronic and thermal Enthalpies=           |              |              | -2841.894119                                                      |
| Sum of electronic and thermal Free Energies=        |              |              | -2842.019317                                                      |
| Lowest vibration frequencies (/cm <sup>-1</sup> ) : |              |              | 17.8951                      25.5572                      32.6304 |

|          |              |              |              |
|----------|--------------|--------------|--------------|
| <b>2</b> |              |              |              |
| Fe       | -0.000024000 | -0.951725000 | -0.022638000 |
| C        | -1.339480000 | -3.603439000 | 0.051176000  |
| C        | 1.172585000  | -3.671833000 | -0.258574000 |
| C        | -0.076832000 | -4.217229000 | 0.078231000  |
| H        | -0.090135000 | -5.298298000 | 0.208588000  |
| N        | -1.522323000 | -2.283058000 | -0.066017000 |
| N        | 1.391599000  | -2.362748000 | -0.431929000 |
| C        | 2.699837000  | -1.961986000 | -0.889686000 |
| C        | 2.926874000  | -1.797830000 | -2.285422000 |
| C        | 3.754448000  | -1.734526000 | 0.040593000  |
| C        | 4.206892000  | -1.419047000 | -2.716907000 |
| C        | 5.010300000  | -1.351926000 | -0.455729000 |
| C        | 5.245842000  | -1.196155000 | -1.818321000 |

|   |              |              |              |
|---|--------------|--------------|--------------|
| H | 4.393943000  | -1.300176000 | -3.784545000 |
| H | 5.825101000  | -1.175548000 | 0.247164000  |
| H | 6.233377000  | -0.902243000 | -2.177735000 |
| C | -2.878063000 | -1.806094000 | -0.189128000 |
| C | -3.659320000 | -1.540581000 | 0.972154000  |
| C | -3.427751000 | -1.602474000 | -1.486276000 |
| C | -4.973526000 | -1.079044000 | 0.799454000  |
| C | -4.750871000 | -1.147448000 | -1.590100000 |
| C | -5.524672000 | -0.885433000 | -0.463582000 |
| H | -5.581554000 | -0.870574000 | 1.680196000  |
| H | -5.185389000 | -0.997957000 | -2.578902000 |
| H | -6.551439000 | -0.531306000 | -0.569092000 |
| C | 1.846622000  | -2.029664000 | -3.335450000 |
| H | 0.905756000  | -2.216078000 | -2.802944000 |
| C | 3.594543000  | -1.883789000 | 1.550085000  |
| H | 2.552711000  | -2.162671000 | 1.747365000  |
| C | -3.146331000 | -1.734276000 | 2.395255000  |
| H | -2.107212000 | -2.078297000 | 2.329457000  |
| C | -2.648228000 | -1.869105000 | -2.768930000 |
| H | -1.618928000 | -2.116788000 | -2.480989000 |
| C | 2.260897000  | -4.708105000 | -0.467886000 |
| H | 3.239349000  | -4.277023000 | -0.687869000 |
| H | 2.346881000  | -5.333312000 | 0.431393000  |
| H | 1.985472000  | -5.376142000 | -1.295260000 |
| C | -2.500927000 | -4.577751000 | 0.109735000  |
| H | -3.478387000 | -4.092444000 | 0.139672000  |
| H | -2.474093000 | -5.242605000 | -0.764490000 |
| H | -2.398405000 | -5.215880000 | 0.998132000  |
| C | -2.585029000 | -0.629892000 | -3.675378000 |
| H | -3.577111000 | -0.345497000 | -4.052491000 |
| H | -2.168909000 | 0.236562000  | -3.146580000 |
| H | -1.950696000 | -0.831328000 | -4.549987000 |
| C | -3.208780000 | -3.073434000 | -3.543318000 |
| H | -4.233211000 | -2.885905000 | -3.895598000 |
| H | -2.587676000 | -3.282605000 | -4.427010000 |
| H | -3.231342000 | -3.979800000 | -2.925456000 |
| C | 1.630433000  | -0.796359000 | -4.227080000 |
| H | 1.409127000  | 0.099021000  | -3.633070000 |
| H | 2.511629000  | -0.576264000 | -4.845628000 |
| H | 0.788063000  | -0.966988000 | -4.912098000 |
| C | 2.139295000  | -3.268506000 | -4.198056000 |
| H | 3.057300000  | -3.140099000 | -4.789214000 |
| H | 2.262188000  | -4.171444000 | -3.587197000 |
| H | 1.313630000  | -3.447770000 | -4.902756000 |
| C | 3.870235000  | -0.561322000 | 2.285579000  |
| H | 3.626047000  | -0.662344000 | 3.352665000  |
| H | 4.928400000  | -0.272837000 | 2.214647000  |
| H | 3.274055000  | 0.264065000  | 1.879527000  |
| C | 4.479780000  | -2.999331000 | 2.131380000  |
| H | 5.548794000  | -2.771956000 | 2.014321000  |
| H | 4.283703000  | -3.112951000 | 3.207744000  |

|                                                    |              |              |              |
|----------------------------------------------------|--------------|--------------|--------------|
| H                                                  | 4.292004000  | -3.967917000 | 1.652507000  |
| C                                                  | -3.931334000 | -2.810201000 | 3.165169000  |
| H                                                  | -3.938955000 | -3.772816000 | 2.639742000  |
| H                                                  | -3.477895000 | -2.970935000 | 4.154372000  |
| H                                                  | -4.976652000 | -2.511947000 | 3.328178000  |
| C                                                  | -3.151553000 | -0.417092000 | 3.189654000  |
| H                                                  | -2.662539000 | -0.559428000 | 4.163829000  |
| H                                                  | -2.621422000 | 0.382313000  | 2.659385000  |
| H                                                  | -4.175177000 | -0.066287000 | 3.382304000  |
| C                                                  | 1.127617000  | 0.320220000  | -0.466989000 |
| C                                                  | 0.230818000  | -0.754310000 | 1.745007000  |
| C                                                  | -1.135915000 | 0.380223000  | -0.167222000 |
| O                                                  | 1.783277000  | 1.257011000  | -0.701787000 |
| O                                                  | -1.780411000 | 1.351641000  | -0.226210000 |
| O                                                  | 0.379239000  | -0.460345000 | 2.863489000  |
| Sum of electronic and thermal Energies=            |              |              | -2841.951530 |
| Sum of electronic and thermal Enthalpies=          |              |              | -2841.950586 |
| Sum of electronic and thermal Free Energies=       |              |              | -2842.068535 |
| Lowest vibration frequencies (/cm <sup>-1</sup> ): | 18.0652      | 34.8484      | 40.9354      |

\*2\*

|    |              |              |              |
|----|--------------|--------------|--------------|
| Fe | 0.042533000  | -0.859341000 | -0.430731000 |
| C  | -1.273883000 | -3.574972000 | -0.047059000 |
| C  | 1.174648000  | -3.693557000 | -0.489645000 |
| C  | -0.062607000 | -4.265140000 | -0.171626000 |
| H  | -0.094955000 | -5.345686000 | -0.044930000 |
| N  | -1.482824000 | -2.264407000 | -0.165847000 |
| N  | 1.402906000  | -2.400693000 | -0.670268000 |
| H  | -2.157739000 | -4.192754000 | 0.160092000  |
| H  | 2.026658000  | -4.375647000 | -0.609468000 |
| C  | 2.720760000  | -2.007134000 | -1.048246000 |
| C  | 3.047269000  | -1.901809000 | -2.426358000 |
| C  | 3.684111000  | -1.698166000 | -0.053199000 |
| C  | 4.309045000  | -1.403753000 | -2.780025000 |
| C  | 4.933815000  | -1.207531000 | -0.461440000 |
| C  | 5.243471000  | -1.041050000 | -1.810009000 |
| H  | 4.560884000  | -1.308567000 | -3.838137000 |
| H  | 5.676213000  | -0.959030000 | 0.299799000  |
| H  | 6.216451000  | -0.645498000 | -2.105549000 |
| C  | -2.852639000 | -1.877019000 | -0.019479000 |
| C  | -3.380472000 | -1.629366000 | 1.271185000  |
| C  | -3.663218000 | -1.747272000 | -1.173650000 |
| C  | -4.720609000 | -1.228256000 | 1.379893000  |
| C  | -4.996948000 | -1.344326000 | -1.011904000 |
| C  | -5.526362000 | -1.081326000 | 0.251371000  |
| H  | -5.133684000 | -1.030867000 | 2.370928000  |
| H  | -5.628198000 | -1.240585000 | -1.896597000 |
| H  | -6.565418000 | -0.765367000 | 0.355882000  |
| C  | 2.112683000  | -2.377936000 | -3.508310000 |
| H  | 1.063095000  | -2.357785000 | -3.199194000 |
| H  | 2.219762000  | -1.772226000 | -4.417756000 |

|                                                     |              |              |                                                                   |
|-----------------------------------------------------|--------------|--------------|-------------------------------------------------------------------|
| H                                                   | 2.344943000  | -3.419403000 | -3.782608000                                                      |
| C                                                   | 3.443965000  | -1.946997000 | 1.413904000                                                       |
| H                                                   | 2.387520000  | -2.102430000 | 1.649469000                                                       |
| H                                                   | 3.985392000  | -2.849417000 | 1.739163000                                                       |
| H                                                   | 3.815465000  | -1.112672000 | 2.024175000                                                       |
| C                                                   | -2.541916000 | -1.804017000 | 2.508816000                                                       |
| H                                                   | -2.307014000 | -2.862310000 | 2.696778000                                                       |
| H                                                   | -1.580430000 | -1.281084000 | 2.426032000                                                       |
| H                                                   | -3.065712000 | -1.419578000 | 3.393090000                                                       |
| C                                                   | -3.125249000 | -2.052367000 | -2.545536000                                                      |
| H                                                   | -2.237188000 | -1.449177000 | -2.776629000                                                      |
| H                                                   | -2.820923000 | -3.104930000 | -2.638828000                                                      |
| H                                                   | -3.881555000 | -1.852736000 | -3.315116000                                                      |
| C                                                   | 0.727948000  | 0.130681000  | 1.009584000                                                       |
| C                                                   | 0.244595000  | 0.123278000  | -2.018589000                                                      |
| C                                                   | -1.452657000 | 0.594605000  | -0.200648000                                                      |
| O                                                   | 1.117758000  | 0.777531000  | 1.892844000                                                       |
| O                                                   | 0.362179000  | 0.762438000  | -2.981979000                                                      |
| O                                                   | -1.800827000 | 1.701479000  | -0.152798000                                                      |
| Sum of electronic and thermal Energies=             |              |              | -2449.258120                                                      |
| Sum of electronic and thermal Enthalpies=           |              |              | -2449.257176                                                      |
| Sum of electronic and thermal Free Energies=        |              |              | -2449.354892                                                      |
| Lowest vibration frequencies (/cm <sup>-1</sup> ) : |              |              | 11.9495                      26.3671                      39.6741 |

2'

|    |              |              |              |
|----|--------------|--------------|--------------|
| Fe | -0.132582000 | -0.878131000 | -0.970545000 |
| C  | -1.357467000 | -3.552845000 | -0.591492000 |
| C  | 1.066177000  | -3.589439000 | -1.000713000 |
| C  | -0.176335000 | -4.221354000 | -0.920001000 |
| H  | -0.203350000 | -5.306812000 | -0.982938000 |
| N  | -1.518652000 | -2.238750000 | -0.478612000 |
| N  | 1.294670000  | -2.281154000 | -0.952780000 |
| H  | -2.236383000 | -4.168927000 | -0.367294000 |
| H  | 1.951316000  | -4.232317000 | -1.075358000 |
| C  | 2.690459000  | -1.935532000 | -0.925203000 |
| C  | 3.427969000  | -1.839409000 | -2.129449000 |
| C  | 3.313987000  | -1.727113000 | 0.330288000  |
| C  | 4.788650000  | -1.500820000 | -2.049113000 |
| C  | 4.673893000  | -1.388366000 | 0.353713000  |
| C  | 5.410173000  | -1.268337000 | -0.824547000 |
| H  | 5.365210000  | -1.422894000 | -2.972813000 |
| H  | 5.160457000  | -1.225572000 | 1.317101000  |
| H  | 6.468299000  | -1.005274000 | -0.786869000 |
| C  | -2.816172000 | -1.849470000 | 0.003418000  |
| C  | -2.984153000 | -1.632661000 | 1.393697000  |
| C  | -3.904324000 | -1.717013000 | -0.891642000 |
| C  | -4.247490000 | -1.248366000 | 1.863519000  |
| C  | -5.150212000 | -1.334659000 | -0.367873000 |
| C  | -5.325787000 | -1.093541000 | 0.992779000  |
| H  | -4.383539000 | -1.076844000 | 2.932816000  |
| H  | -5.995802000 | -1.228123000 | -1.050014000 |

|                                                     |              |              |                                                                   |
|-----------------------------------------------------|--------------|--------------|-------------------------------------------------------------------|
| H                                                   | -6.302724000 | -0.795121000 | 1.375907000                                                       |
| C                                                   | 2.810184000  | -2.065749000 | -3.484617000                                                      |
| H                                                   | 2.009673000  | -2.813390000 | -3.468129000                                                      |
| H                                                   | 2.376083000  | -1.136763000 | -3.882398000                                                      |
| H                                                   | 3.570921000  | -2.399638000 | -4.202350000                                                      |
| C                                                   | 2.555151000  | -1.871688000 | 1.621844000                                                       |
| H                                                   | 1.744571000  | -1.133659000 | 1.700405000                                                       |
| H                                                   | 2.089230000  | -2.862261000 | 1.715807000                                                       |
| H                                                   | 3.221991000  | -1.729833000 | 2.481470000                                                       |
| C                                                   | -1.846501000 | -1.822066000 | 2.359956000                                                       |
| H                                                   | -1.484279000 | -2.860178000 | 2.364626000                                                       |
| H                                                   | -0.985679000 | -1.191235000 | 2.100449000                                                       |
| H                                                   | -2.157065000 | -1.570295000 | 3.381668000                                                       |
| C                                                   | -3.775222000 | -1.948046000 | -2.374523000                                                      |
| H                                                   | -3.466963000 | -1.028513000 | -2.893202000                                                      |
| H                                                   | -3.038559000 | -2.719721000 | -2.623227000                                                      |
| H                                                   | -4.740407000 | -2.250820000 | -2.801270000                                                      |
| C                                                   | 1.074298000  | 0.400954000  | -0.904372000                                                      |
| C                                                   | -0.429768000 | -0.705821000 | -2.734012000                                                      |
| C                                                   | -1.211519000 | 0.435043000  | -0.512787000                                                      |
| O                                                   | 1.786230000  | 1.324527000  | -0.896494000                                                      |
| O                                                   | -0.614751000 | -0.434803000 | -3.852380000                                                      |
| O                                                   | -1.852864000 | 1.378627000  | -0.271597000                                                      |
| Sum of electronic and thermal Energies=             |              |              | -2449.314865                                                      |
| Sum of electronic and thermal Enthalpies=           |              |              | -2449.313921                                                      |
| Sum of electronic and thermal Free Energies=        |              |              | -2449.406637                                                      |
| Lowest vibration frequencies (/cm <sup>-1</sup> ) : |              |              | 17.3574                      25.9189                      40.4935 |

<sup>4</sup>3 (computed at the OPBE-d3bj level)

|    |              |              |              |
|----|--------------|--------------|--------------|
| Fe | 0.005365000  | -0.071660000 | 0.007314000  |
| C  | -2.597571000 | -1.371644000 | -1.556247000 |
| P  | 0.854638000  | 0.278374000  | 2.013574000  |
| C  | -2.791660000 | -1.928210000 | -0.289133000 |
| H  | -1.947999000 | -1.959836000 | 0.387978000  |
| P  | -1.000711000 | -0.580765000 | -1.897240000 |
| C  | -4.046018000 | -2.402522000 | 0.095892000  |
| H  | -4.188909000 | -2.782133000 | 1.105273000  |
| P  | 0.602421000  | 1.775571000  | -1.165727000 |
| C  | -5.110873000 | -2.338031000 | -0.803411000 |
| H  | -6.098188000 | -2.690781000 | -0.505603000 |
| P  | -1.781417000 | 0.933890000  | 0.913049000  |
| C  | -3.662221000 | -1.333446000 | -2.466350000 |
| H  | -3.513107000 | -0.906889000 | -3.455841000 |
| C  | -0.309638000 | -1.668004000 | -3.163694000 |
| C  | 0.060668000  | -1.212391000 | -4.442616000 |
| H  | -0.135333000 | -0.183343000 | -4.736788000 |
| C  | 0.707723000  | -2.065228000 | -5.336019000 |
| H  | 0.992132000  | -1.695029000 | -6.321371000 |
| C  | 0.986954000  | -3.385806000 | -4.973799000 |
| H  | 1.496159000  | -4.049378000 | -5.672224000 |
| C  | 0.604007000  | -3.849118000 | -3.709872000 |

|   |              |              |              |
|---|--------------|--------------|--------------|
| H | 0.819613000  | -4.874654000 | -3.412420000 |
| C | -0.034676000 | -3.003356000 | -2.810706000 |
| H | -0.304499000 | -3.361560000 | -1.820755000 |
| C | -3.006744000 | 1.820119000  | -0.069703000 |
| C | -2.721363000 | 3.117115000  | -0.525426000 |
| H | -1.846888000 | 3.642292000  | -0.155559000 |
| C | -3.536187000 | 3.722225000  | -1.479656000 |
| H | -3.299851000 | 4.727818000  | -1.828126000 |
| C | -4.649101000 | 3.045074000  | -1.987380000 |
| H | -5.279070000 | 3.514508000  | -2.742390000 |
| C | -4.948432000 | 1.762185000  | -1.518811000 |
| H | -5.809812000 | 1.221188000  | -1.907673000 |
| C | -4.135946000 | 1.148453000  | -0.568962000 |
| H | -4.359685000 | 0.143564000  | -0.224734000 |
| C | -2.770838000 | -0.021494000 | 2.089788000  |
| C | -2.197627000 | -1.163265000 | 2.667001000  |
| H | -1.189204000 | -1.445968000 | 2.378632000  |
| C | -2.903290000 | -1.931484000 | 3.586147000  |
| H | -2.427100000 | -2.807452000 | 4.024270000  |
| C | -4.209586000 | -1.571148000 | 3.938836000  |
| H | -4.773466000 | -2.173795000 | 4.650163000  |
| C | -4.784417000 | -0.424910000 | 3.376896000  |
| H | -5.796890000 | -0.132073000 | 3.656260000  |
| C | -4.070519000 | 0.355406000  | 2.469949000  |
| H | -4.518247000 | 1.249906000  | 2.041962000  |
| C | 0.390600000  | 5.849530000  | -0.385061000 |
| H | -0.061193000 | 6.744422000  | -0.813110000 |
| C | 1.150477000  | 5.940732000  | 0.786709000  |
| H | 1.285483000  | 6.903128000  | 1.279065000  |
| C | 1.737293000  | 4.787302000  | 1.312376000  |
| H | 2.342794000  | 4.835232000  | 2.217184000  |
| C | 1.545002000  | 3.558282000  | 0.688048000  |
| H | 1.990541000  | 2.659844000  | 1.102219000  |
| C | 0.780069000  | 3.453412000  | -0.490600000 |
| C | 0.217119000  | 4.622182000  | -1.024235000 |
| H | -0.362760000 | 4.588954000  | -1.942271000 |
| C | 2.248243000  | 1.552291000  | -1.912608000 |
| C | 3.359225000  | 2.356771000  | -1.627825000 |
| H | 3.268079000  | 3.177669000  | -0.922745000 |
| C | 4.581504000  | 2.105750000  | -2.247334000 |
| H | 5.436256000  | 2.740513000  | -2.014401000 |
| C | 4.719501000  | 1.045724000  | -3.152355000 |
| H | 5.680409000  | 0.851743000  | -3.628304000 |
| C | 3.612551000  | 0.248079000  | -3.447167000 |
| H | 3.691982000  | -0.579461000 | -4.151704000 |
| C | 2.384973000  | 0.500833000  | -2.836922000 |
| H | 1.531592000  | -0.128448000 | -3.070241000 |
| C | 0.785175000  | -1.874496000 | -0.019823000 |
| C | 0.341496000  | -3.012721000 | 0.670319000  |
| H | -0.529245000 | -2.970532000 | 1.321294000  |
| C | 1.001735000  | -4.240375000 | 0.575607000  |

|                                                     |              |              |                                                                   |
|-----------------------------------------------------|--------------|--------------|-------------------------------------------------------------------|
| H                                                   | 0.615404000  | -5.098385000 | 1.128663000                                                       |
| C                                                   | 2.168821000  | -4.381842000 | -0.180188000                                                      |
| C                                                   | 2.636893000  | -3.248016000 | -0.858254000                                                      |
| H                                                   | 3.534715000  | -3.321752000 | -1.475299000                                                      |
| C                                                   | 1.944095000  | -2.042184000 | -0.798543000                                                      |
| H                                                   | 2.305423000  | -1.214967000 | -1.406493000                                                      |
| C                                                   | 2.890358000  | -5.693175000 | -0.278758000                                                      |
| H                                                   | 2.401478000  | -6.464595000 | 0.329225000                                                       |
| H                                                   | 3.932243000  | -5.602846000 | 0.061794000                                                       |
| H                                                   | 2.922897000  | -6.053176000 | -1.317786000                                                      |
| C                                                   | 3.393914000  | 0.544767000  | 0.944192000                                                       |
| H                                                   | 2.963303000  | 0.012907000  | 0.103843000                                                       |
| C                                                   | 4.734896000  | 0.929682000  | 0.930918000                                                       |
| H                                                   | 5.347720000  | 0.690222000  | 0.065122000                                                       |
| C                                                   | 5.268518000  | 1.640658000  | 2.004540000                                                       |
| H                                                   | 6.311167000  | 1.957519000  | 1.988055000                                                       |
| C                                                   | 4.465218000  | 1.936566000  | 3.113425000                                                       |
| H                                                   | 4.886054000  | 2.471747000  | 3.964942000                                                       |
| C                                                   | 3.135239000  | 1.525012000  | 3.143677000                                                       |
| H                                                   | 2.526958000  | 1.716039000  | 4.025808000                                                       |
| C                                                   | 2.584984000  | 0.847614000  | 2.045430000                                                       |
| C                                                   | 1.094200000  | -1.101649000 | 3.177983000                                                       |
| C                                                   | 0.366555000  | -1.303445000 | 4.360590000                                                       |
| H                                                   | -0.394463000 | -0.594499000 | 4.672821000                                                       |
| C                                                   | 0.590205000  | -2.436429000 | 5.143923000                                                       |
| H                                                   | 0.013485000  | -2.575553000 | 6.058635000                                                       |
| C                                                   | 1.543669000  | -3.382403000 | 4.762550000                                                       |
| H                                                   | 1.712566000  | -4.268293000 | 5.374376000                                                       |
| C                                                   | 2.278981000  | -3.182799000 | 3.589859000                                                       |
| H                                                   | 3.015816000  | -3.917833000 | 3.269366000                                                       |
| C                                                   | 2.057852000  | -2.057855000 | 2.803973000                                                       |
| H                                                   | 2.618286000  | -1.921405000 | 1.882919000                                                       |
| C                                                   | -1.516885000 | 0.929151000  | -2.795139000                                                      |
| H                                                   | -1.792981000 | 0.720523000  | -3.833652000                                                      |
| H                                                   | -2.413909000 | 1.263409000  | -2.270724000                                                      |
| C                                                   | -0.431678000 | 1.982032000  | -2.699287000                                                      |
| H                                                   | -0.882968000 | 2.976132000  | -2.714349000                                                      |
| H                                                   | 0.271103000  | 1.914012000  | -3.536909000                                                      |
| C                                                   | -1.089541000 | 2.233369000  | 2.021100000                                                       |
| H                                                   | -0.573672000 | 2.973721000  | 1.406053000                                                       |
| H                                                   | -1.908284000 | 2.719627000  | 2.565412000                                                       |
| C                                                   | -0.106279000 | 1.554166000  | 2.954690000                                                       |
| H                                                   | -0.658078000 | 1.045116000  | 3.749962000                                                       |
| H                                                   | 0.571980000  | 2.283487000  | 3.408852000                                                       |
| C                                                   | -4.913434000 | -1.819400000 | -2.090632000                                                      |
| H                                                   | -5.744696000 | -1.778026000 | -2.794459000                                                      |
| Sum of electronic and thermal Energies=             |              |              | -4909.595685                                                      |
| Sum of electronic and thermal Enthalpies=           |              |              | -4909.594740                                                      |
| Sum of electronic and thermal Free Energies=        |              |              | -4909.751045                                                      |
| Lowest vibration frequencies (/cm <sup>-1</sup> ) : |              |              | 20.7359                      22.5486                      29.0542 |



<sup>23</sup> (computed at the OPBE-d3bj level)

|    |              |              |              |
|----|--------------|--------------|--------------|
| Fe | -0.067587000 | -0.070272000 | 0.055717000  |
| C  | -2.713338000 | -1.430806000 | -1.505817000 |
| P  | 0.824533000  | 0.251477000  | 1.968201000  |
| C  | -2.957201000 | -2.065847000 | -0.286833000 |
| H  | -2.136658000 | -2.142543000 | 0.415956000  |
| P  | -1.088702000 | -0.633983000 | -1.730000000 |
| C  | -4.232639000 | -2.527331000 | 0.033351000  |
| H  | -4.415487000 | -2.969586000 | 1.010817000  |
| P  | 0.599626000  | 1.622055000  | -1.077199000 |
| C  | -5.272502000 | -2.372315000 | -0.886198000 |
| H  | -6.278592000 | -2.708136000 | -0.635213000 |
| P  | -1.722011000 | 0.929688000  | 0.897018000  |
| C  | -3.747130000 | -1.317311000 | -2.443820000 |
| H  | -3.562517000 | -0.835018000 | -3.400795000 |
| C  | -0.350849000 | -1.766913000 | -2.959605000 |
| C  | 0.029295000  | -1.356386000 | -4.244047000 |
| H  | -0.141188000 | -0.331866000 | -4.567168000 |
| C  | 0.668814000  | -2.243595000 | -5.112187000 |
| H  | 0.967084000  | -1.905627000 | -6.104852000 |
| C  | 0.926070000  | -3.554586000 | -4.708404000 |
| H  | 1.433698000  | -4.244536000 | -5.382527000 |
| C  | 0.529534000  | -3.975722000 | -3.437157000 |
| H  | 0.732642000  | -4.992588000 | -3.105004000 |
| C  | -0.105154000 | -3.091055000 | -2.570457000 |
| H  | -0.381366000 | -3.413401000 | -1.571536000 |
| C  | -2.953450000 | 1.837017000  | -0.073144000 |
| C  | -2.654209000 | 3.129142000  | -0.528918000 |
| H  | -1.745901000 | 3.624019000  | -0.195874000 |
| C  | -3.490482000 | 3.760237000  | -1.448332000 |
| H  | -3.241999000 | 4.760403000  | -1.803892000 |
| C  | -4.635043000 | 3.110659000  | -1.919744000 |
| H  | -5.281211000 | 3.601019000  | -2.647576000 |
| C  | -4.947101000 | 1.831294000  | -1.452508000 |
| H  | -5.831809000 | 1.311888000  | -1.818095000 |
| C  | -4.114501000 | 1.195294000  | -0.533466000 |
| H  | -4.343015000 | 0.189640000  | -0.193632000 |
| C  | -2.797829000 | -0.017080000 | 2.045251000  |
| C  | -2.270317000 | -1.179918000 | 2.608911000  |
| H  | -1.279331000 | -1.495920000 | 2.291569000  |
| C  | -2.986961000 | -1.913062000 | 3.552591000  |
| H  | -2.546875000 | -2.811842000 | 3.982969000  |
| C  | -4.258826000 | -1.484166000 | 3.938257000  |
| H  | -4.834566000 | -2.057645000 | 4.664758000  |
| C  | -4.787652000 | -0.307800000 | 3.397257000  |
| H  | -5.774617000 | 0.037422000  | 3.706296000  |
| C  | -4.056205000 | 0.430754000  | 2.466705000  |
| H  | -4.465346000 | 1.350513000  | 2.052860000  |
| C  | 0.826494000  | 5.757909000  | -0.741379000 |
| H  | 0.627977000  | 6.629106000  | -1.366138000 |
| C  | 1.344819000  | 5.924336000  | 0.545042000  |

|   |              |              |              |
|---|--------------|--------------|--------------|
| H | 1.542633000  | 6.923677000  | 0.932041000  |
| C | 1.625744000  | 4.797717000  | 1.319570000  |
| H | 2.058614000  | 4.902483000  | 2.314216000  |
| C | 1.354890000  | 3.525119000  | 0.820161000  |
| H | 1.594114000  | 2.651447000  | 1.413618000  |
| C | 0.810921000  | 3.341549000  | -0.456202000 |
| C | 0.580026000  | 4.479533000  | -1.243649000 |
| H | 0.228293000  | 4.375977000  | -2.266379000 |
| C | 2.212957000  | 1.560655000  | -1.972120000 |
| C | 3.279684000  | 2.437502000  | -1.739092000 |
| H | 3.176471000  | 3.229928000  | -1.003351000 |
| C | 4.479547000  | 2.286854000  | -2.436709000 |
| H | 5.301993000  | 2.975632000  | -2.241138000 |
| C | 4.632812000  | 1.263785000  | -3.374941000 |
| H | 5.573076000  | 1.149775000  | -3.914323000 |
| C | 3.571447000  | 0.386423000  | -3.613623000 |
| H | 3.671331000  | -0.424757000 | -4.334814000 |
| C | 2.376416000  | 0.535317000  | -2.913871000 |
| H | 1.565774000  | -0.167604000 | -3.077321000 |
| C | 0.988711000  | -1.708049000 | -0.058131000 |
| C | 0.515506000  | -2.852897000 | 0.616191000  |
| H | -0.351055000 | -2.782672000 | 1.269084000  |
| C | 1.129857000  | -4.101240000 | 0.503610000  |
| H | 0.716190000  | -4.952962000 | 1.046491000  |
| C | 2.286877000  | -4.269388000 | -0.262876000 |
| C | 2.792823000  | -3.136367000 | -0.913269000 |
| H | 3.695214000  | -3.226056000 | -1.521783000 |
| C | 2.151766000  | -1.902634000 | -0.821868000 |
| H | 2.570124000  | -1.069457000 | -1.377025000 |
| C | 2.962139000  | -5.602497000 | -0.391190000 |
| H | 2.464254000  | -6.362909000 | 0.223663000  |
| H | 4.015332000  | -5.550824000 | -0.078571000 |
| H | 2.954802000  | -5.954581000 | -1.433589000 |
| C | 3.348283000  | 0.737576000  | 0.911725000  |
| H | 2.894430000  | 0.346831000  | 0.009536000  |
| C | 4.680708000  | 1.147504000  | 0.942466000  |
| H | 5.283389000  | 1.071519000  | 0.039918000  |
| C | 5.220413000  | 1.670160000  | 2.118364000  |
| H | 6.257720000  | 2.004237000  | 2.143300000  |
| C | 4.432640000  | 1.755831000  | 3.272027000  |
| H | 4.859042000  | 2.147097000  | 4.196060000  |
| C | 3.107972000  | 1.323905000  | 3.247150000  |
| H | 2.506216000  | 1.345280000  | 4.154480000  |
| C | 2.556166000  | 0.836224000  | 2.054566000  |
| C | 1.101864000  | -1.153033000 | 3.122352000  |
| C | 0.336663000  | -1.426566000 | 4.260832000  |
| H | -0.488054000 | -0.779833000 | 4.545043000  |
| C | 0.597490000  | -2.555448000 | 5.040597000  |
| H | -0.010952000 | -2.749689000 | 5.924160000  |
| C | 1.632041000  | -3.424732000 | 4.692510000  |
| H | 1.833207000  | -4.307905000 | 5.298922000  |

|                                                                             |              |              |              |
|-----------------------------------------------------------------------------|--------------|--------------|--------------|
| C                                                                           | 2.407997000  | -3.153836000 | 3.563500000  |
| H                                                                           | 3.210331000  | -3.829747000 | 3.270993000  |
| C                                                                           | 2.147470000  | -2.030063000 | 2.784690000  |
| H                                                                           | 2.743597000  | -1.833291000 | 1.897518000  |
| C                                                                           | -1.549206000 | 0.842531000  | -2.714116000 |
| H                                                                           | -1.758029000 | 0.586116000  | -3.757111000 |
| H                                                                           | -2.484923000 | 1.183623000  | -2.268015000 |
| C                                                                           | -0.488056000 | 1.911675000  | -2.581343000 |
| H                                                                           | -0.978566000 | 2.881584000  | -2.477928000 |
| H                                                                           | 0.170436000  | 1.946916000  | -3.455093000 |
| C                                                                           | -1.158876000 | 2.181656000  | 2.129016000  |
| H                                                                           | -0.703820000 | 3.006832000  | 1.577717000  |
| H                                                                           | -2.008760000 | 2.556158000  | 2.711429000  |
| C                                                                           | -0.133168000 | 1.481647000  | 2.996837000  |
| H                                                                           | -0.652359000 | 0.922273000  | 3.779271000  |
| H                                                                           | 0.551974000  | 2.185786000  | 3.480924000  |
| C                                                                           | -5.022848000 | -1.785024000 | -2.131266000 |
| H                                                                           | -5.832513000 | -1.673667000 | -2.852759000 |
| Sum of electronic and thermal Energies=                                     |              |              | -4909.653566 |
| Sum of electronic and thermal Enthalpies=                                   |              |              | -4909.652622 |
| Sum of electronic and thermal Free Energies=                                |              |              | -4909.805973 |
| Lowest vibration frequencies (/cm <sup>-1</sup> ) : 23.4377 24.0750 29.6239 |              |              |              |

**<sup>4</sup>3Ta** (optimized at the OPBE level, without dispersion)

|    |              |              |              |
|----|--------------|--------------|--------------|
| Fe | 0.577794000  | -0.255872000 | 1.214858000  |
| C  | -3.722052000 | -1.129405000 | -3.985059000 |
| P  | 1.736329000  | 0.774864000  | 2.999912000  |
| C  | -4.541265000 | -2.076782000 | -4.633098000 |
| H  | -4.123738000 | -3.047816000 | -4.906829000 |
| P  | -1.983553000 | -1.664061000 | -3.662065000 |
| C  | -5.877257000 | -1.797231000 | -4.925926000 |
| H  | -6.488661000 | -2.546302000 | -5.432417000 |
| P  | 1.046833000  | 0.425371000  | -0.934643000 |
| C  | -6.433093000 | -0.567147000 | -4.559023000 |
| H  | -7.479194000 | -0.348149000 | -4.779933000 |
| P  | -1.372805000 | 0.600339000  | 2.124809000  |
| C  | -4.297902000 | 0.098958000  | -3.614753000 |
| H  | -3.709144000 | 0.852857000  | -3.094834000 |
| C  | -1.150219000 | -1.206708000 | -5.254860000 |
| C  | -1.514454000 | -0.112757000 | -6.061272000 |
| H  | -2.351487000 | 0.521681000  | -5.769031000 |
| C  | -0.824746000 | 0.162483000  | -7.245457000 |
| H  | -1.125744000 | 1.012262000  | -7.861510000 |
| C  | 0.244290000  | -0.647516000 | -7.644340000 |
| H  | 0.780296000  | -0.431615000 | -8.570219000 |
| C  | 0.613846000  | -1.740926000 | -6.856584000 |
| H  | 1.440802000  | -2.383836000 | -7.163404000 |
| C  | -0.083871000 | -2.022553000 | -5.677464000 |
| H  | 0.198806000  | -2.888714000 | -5.076373000 |
| C  | -2.850668000 | 1.340197000  | 1.279338000  |
| C  | -2.884792000 | 2.683940000  | 0.862508000  |

|   |              |              |              |
|---|--------------|--------------|--------------|
| H | -2.037727000 | 3.342123000  | 1.045784000  |
| C | -4.003443000 | 3.203692000  | 0.204741000  |
| H | -4.008828000 | 4.253265000  | -0.095491000 |
| C | -5.108182000 | 2.390315000  | -0.062640000 |
| H | -5.984819000 | 2.799648000  | -0.567289000 |
| C | -5.075866000 | 1.044953000  | 0.318292000  |
| H | -5.924914000 | 0.393610000  | 0.104671000  |
| C | -3.959757000 | 0.524958000  | 0.977466000  |
| H | -3.961898000 | -0.523022000 | 1.278050000  |
| C | -2.233231000 | -0.434431000 | 3.411484000  |
| C | -1.869892000 | -1.780262000 | 3.576207000  |
| H | -1.102783000 | -2.208715000 | 2.932294000  |
| C | -2.486792000 | -2.571642000 | 4.552866000  |
| H | -2.194908000 | -3.618082000 | 4.657877000  |
| C | -3.469946000 | -2.027532000 | 5.382476000  |
| H | -3.949347000 | -2.643331000 | 6.145560000  |
| C | -3.843395000 | -0.687784000 | 5.224739000  |
| H | -4.617094000 | -0.255652000 | 5.862323000  |
| C | -3.235486000 | 0.100304000  | 4.244894000  |
| H | -3.561752000 | 1.133366000  | 4.118609000  |
| C | 0.470129000  | 3.842265000  | -3.281297000 |
| H | 0.336832000  | 4.083067000  | -4.337732000 |
| C | 0.484325000  | 4.862529000  | -2.325178000 |
| H | 0.359221000  | 5.903032000  | -2.629995000 |
| C | 0.667415000  | 4.538973000  | -0.977694000 |
| H | 0.695640000  | 5.327007000  | -0.222669000 |
| C | 0.816160000  | 3.203208000  | -0.592280000 |
| H | 0.961182000  | 2.952975000  | 0.457769000  |
| C | 0.804875000  | 2.166000000  | -1.538803000 |
| C | 0.638993000  | 2.508976000  | -2.894702000 |
| H | 0.656064000  | 1.739827000  | -3.665772000 |
| C | 2.793776000  | 0.093383000  | -1.504528000 |
| C | 3.640591000  | 1.087298000  | -2.028384000 |
| H | 3.286241000  | 2.112328000  | -2.124163000 |
| C | 4.942326000  | 0.776862000  | -2.437275000 |
| H | 5.578237000  | 1.565249000  | -2.845601000 |
| C | 5.424576000  | -0.530653000 | -2.335074000 |
| H | 6.438977000  | -0.771167000 | -2.658016000 |
| C | 4.593564000  | -1.526136000 | -1.812345000 |
| H | 4.954878000  | -2.552150000 | -1.721184000 |
| C | 3.295224000  | -1.218768000 | -1.397067000 |
| H | 2.673323000  | -2.005689000 | -0.974632000 |
| C | 0.734532000  | -2.248587000 | 1.056530000  |
| C | -0.290230000 | -3.055084000 | 0.498641000  |
| H | -1.210086000 | -2.588202000 | 0.133395000  |
| C | -0.196925000 | -4.447334000 | 0.397728000  |
| H | -1.024305000 | -5.010742000 | -0.043968000 |
| C | 0.940706000  | -5.134249000 | 0.855811000  |
| C | 1.969752000  | -4.361940000 | 1.415975000  |
| H | 2.869058000  | -4.859657000 | 1.791207000  |
| C | 1.867019000  | -2.967554000 | 1.508923000  |

|                                                     |              |              |              |
|-----------------------------------------------------|--------------|--------------|--------------|
| H                                                   | 2.707225000  | -2.430100000 | 1.954186000  |
| C                                                   | 1.050649000  | -6.632137000 | 0.732193000  |
| H                                                   | 0.130656000  | -7.136007000 | 1.064493000  |
| H                                                   | 1.883543000  | -7.027736000 | 1.329227000  |
| H                                                   | 1.221405000  | -6.938534000 | -0.312700000 |
| C                                                   | 3.765411000  | 2.163029000  | 1.656216000  |
| H                                                   | 3.631857000  | 1.377853000  | 0.913787000  |
| C                                                   | 4.737200000  | 3.148476000  | 1.455164000  |
| H                                                   | 5.357407000  | 3.115427000  | 0.558413000  |
| C                                                   | 4.903415000  | 4.171410000  | 2.392421000  |
| H                                                   | 5.652473000  | 4.948941000  | 2.232918000  |
| C                                                   | 4.105559000  | 4.189015000  | 3.540735000  |
| H                                                   | 4.234845000  | 4.976600000  | 4.285641000  |
| C                                                   | 3.149725000  | 3.191118000  | 3.750928000  |
| H                                                   | 2.575878000  | 3.211074000  | 4.676799000  |
| C                                                   | 2.955112000  | 2.167688000  | 2.804290000  |
| C                                                   | 2.632734000  | -0.296899000 | 4.222362000  |
| C                                                   | 1.924745000  | -1.297260000 | 4.915419000  |
| H                                                   | 0.858256000  | -1.434093000 | 4.745385000  |
| C                                                   | 2.576897000  | -2.142605000 | 5.815424000  |
| H                                                   | 2.003723000  | -2.905808000 | 6.344638000  |
| C                                                   | 3.953552000  | -2.022620000 | 6.027935000  |
| H                                                   | 4.462992000  | -2.686911000 | 6.727887000  |
| C                                                   | 4.671046000  | -1.049752000 | 5.327765000  |
| H                                                   | 5.747549000  | -0.947841000 | 5.477198000  |
| C                                                   | 4.019245000  | -0.194148000 | 4.434256000  |
| H                                                   | 4.599263000  | 0.560290000  | 3.905745000  |
| C                                                   | -1.303925000 | -0.363363000 | -2.490491000 |
| H                                                   | -1.475589000 | 0.653217000  | -2.866810000 |
| H                                                   | -1.867804000 | -0.468967000 | -1.553630000 |
| C                                                   | 0.185639000  | -0.608300000 | -2.255493000 |
| H                                                   | 0.747843000  | -0.491214000 | -3.191483000 |
| H                                                   | 0.348358000  | -1.642045000 | -1.921704000 |
| C                                                   | -0.772801000 | 2.013152000  | 3.199386000  |
| H                                                   | -0.441825000 | 2.835096000  | 2.551048000  |
| H                                                   | -1.589740000 | 2.396484000  | 3.827587000  |
| C                                                   | 0.384104000  | 1.517696000  | 4.060722000  |
| H                                                   | 0.033694000  | 0.717300000  | 4.726000000  |
| H                                                   | 0.758295000  | 2.321261000  | 4.708220000  |
| C                                                   | -5.640314000 | 0.374761000  | -3.898988000 |
| H                                                   | -6.065037000 | 1.335667000  | -3.602861000 |
| Sum of electronic and thermal Energies=             |              |              | -4908.616562 |
| Sum of electronic and thermal Enthalpies=           |              |              | -4908.615618 |
| Sum of electronic and thermal Free Energies=        |              |              | -4908.785205 |
| Lowest vibration frequencies (/cm <sup>-1</sup> ) : | -17.1898(*)  | 12.0039      | 15.9904      |
| (*) rotation of one phenyl ligand                   |              |              |              |

<sup>23</sup> (optimized at the OPBE level, without dispersion)

|    |              |              |              |
|----|--------------|--------------|--------------|
| Fe | -0.016085000 | -0.130343000 | 0.032540000  |
| C  | -2.750800000 | -1.597478000 | -1.895448000 |
| P  | 1.007227000  | 0.213882000  | 2.004291000  |

|   |              |              |              |
|---|--------------|--------------|--------------|
| C | -3.199782000 | -2.308428000 | -0.774208000 |
| H | -2.598394000 | -2.306234000 | 0.128625000  |
| P | -1.096842000 | -0.725357000 | -1.859881000 |
| C | -4.411686000 | -3.007652000 | -0.794361000 |
| H | -4.735614000 | -3.549513000 | 0.095819000  |
| P | 0.807450000  | 1.598361000  | -1.253701000 |
| C | -5.202488000 | -3.003948000 | -1.944926000 |
| H | -6.150175000 | -3.544816000 | -1.965404000 |
| P | -1.698068000 | 0.994616000  | 1.000164000  |
| C | -3.548475000 | -1.619919000 | -3.055676000 |
| H | -3.218089000 | -1.115476000 | -3.962636000 |
| C | -0.346546000 | -1.776644000 | -3.219174000 |
| C | -0.158844000 | -1.327691000 | -4.539887000 |
| H | -0.392928000 | -0.303372000 | -4.822276000 |
| C | 0.328674000  | -2.183522000 | -5.534174000 |
| H | 0.465426000  | -1.802924000 | -6.548284000 |
| C | 0.631737000  | -3.513038000 | -5.233846000 |
| H | 1.009712000  | -4.181513000 | -6.009374000 |
| C | 0.441216000  | -3.976168000 | -3.929256000 |
| H | 0.671144000  | -5.012091000 | -3.674918000 |
| C | -0.040537000 | -3.120896000 | -2.936010000 |
| H | -0.176811000 | -3.505760000 | -1.929047000 |
| C | -3.062854000 | 2.003082000  | 0.213707000  |
| C | -3.026364000 | 3.406748000  | 0.128073000  |
| H | -2.184695000 | 3.963284000  | 0.531198000  |
| C | -4.071325000 | 4.122017000  | -0.468544000 |
| H | -4.017688000 | 5.211768000  | -0.510707000 |
| C | -5.177444000 | 3.452690000  | -0.997301000 |
| H | -5.992089000 | 4.011588000  | -1.460965000 |
| C | -5.230744000 | 2.057520000  | -0.917306000 |
| H | -6.089489000 | 1.515701000  | -1.317840000 |
| C | -4.190816000 | 1.344173000  | -0.316982000 |
| H | -4.266083000 | 0.261212000  | -0.251526000 |
| C | -2.800081000 | 0.118303000  | 2.250935000  |
| C | -2.562931000 | -1.213012000 | 2.615089000  |
| H | -1.722754000 | -1.740274000 | 2.170080000  |
| C | -3.361338000 | -1.865115000 | 3.562691000  |
| H | -3.149443000 | -2.903778000 | 3.822423000  |
| C | -4.412623000 | -1.184043000 | 4.178492000  |
| H | -5.040018000 | -1.687450000 | 4.916206000  |
| C | -4.650951000 | 0.154304000  | 3.845061000  |
| H | -5.465175000 | 0.701535000  | 4.324188000  |
| C | -3.856600000 | 0.795932000  | 2.892082000  |
| H | -4.074103000 | 1.832926000  | 2.635938000  |
| C | 0.187463000  | 5.739612000  | -0.747018000 |
| H | -0.425747000 | 6.521549000  | -1.199584000 |
| C | 1.064675000  | 6.050914000  | 0.293878000  |
| H | 1.146154000  | 7.074636000  | 0.662738000  |
| C | 1.835286000  | 5.028365000  | 0.855452000  |
| H | 2.530358000  | 5.244965000  | 1.668881000  |
| C | 1.725773000  | 3.718985000  | 0.379364000  |

|   |              |              |              |
|---|--------------|--------------|--------------|
| H | 2.342308000  | 2.946526000  | 0.832203000  |
| C | 0.854882000  | 3.383938000  | -0.679153000 |
| C | 0.086352000  | 4.428013000  | -1.226060000 |
| H | -0.621881000 | 4.240246000  | -2.029668000 |
| C | 2.475074000  | 1.592973000  | -2.155976000 |
| C | 3.387556000  | 2.662249000  | -2.177838000 |
| H | 3.178490000  | 3.575521000  | -1.625720000 |
| C | 4.572167000  | 2.587563000  | -2.920425000 |
| H | 5.257484000  | 3.437767000  | -2.917808000 |
| C | 4.872568000  | 1.446787000  | -3.667838000 |
| H | 5.795294000  | 1.391978000  | -4.248125000 |
| C | 3.969441000  | 0.379523000  | -3.668810000 |
| H | 4.176638000  | -0.519139000 | -4.252891000 |
| C | 2.790824000  | 0.453369000  | -2.921621000 |
| H | 2.103870000  | -0.390788000 | -2.942082000 |
| C | 1.034858000  | -1.852193000 | -0.034790000 |
| C | 0.426796000  | -3.001068000 | 0.534103000  |
| H | -0.551011000 | -2.925090000 | 1.009412000  |
| C | 1.013886000  | -4.270917000 | 0.529328000  |
| H | 0.475622000  | -5.105193000 | 0.989041000  |
| C | 2.279083000  | -4.490232000 | -0.038531000 |
| C | 2.911466000  | -3.369659000 | -0.593320000 |
| H | 3.902191000  | -3.479935000 | -1.044334000 |
| C | 2.306797000  | -2.104933000 | -0.592385000 |
| H | 2.868672000  | -1.296929000 | -1.053267000 |
| C | 2.909210000  | -5.858861000 | -0.063354000 |
| H | 2.801801000  | -6.374984000 | 0.902408000  |
| H | 3.981602000  | -5.805231000 | -0.296035000 |
| H | 2.443449000  | -6.506817000 | -0.824150000 |
| C | 3.693299000  | 0.727699000  | 1.124769000  |
| H | 3.342381000  | 0.420212000  | 0.146212000  |
| C | 5.031787000  | 1.103078000  | 1.295645000  |
| H | 5.709431000  | 1.071925000  | 0.441203000  |
| C | 5.490107000  | 1.520164000  | 2.546173000  |
| H | 6.531566000  | 1.817380000  | 2.681347000  |
| C | 4.603691000  | 1.546260000  | 3.629280000  |
| H | 4.951595000  | 1.859092000  | 4.615690000  |
| C | 3.273493000  | 1.157859000  | 3.459072000  |
| H | 2.613781000  | 1.146721000  | 4.327050000  |
| C | 2.793171000  | 0.755045000  | 2.196694000  |
| C | 1.153056000  | -1.160082000 | 3.282162000  |
| C | 0.291221000  | -1.316231000 | 4.380556000  |
| H | -0.563748000 | -0.660157000 | 4.523397000  |
| C | 0.492219000  | -2.331515000 | 5.323041000  |
| H | -0.192661000 | -2.418008000 | 6.168859000  |
| C | 1.558335000  | -3.221588000 | 5.185637000  |
| H | 1.719013000  | -4.010180000 | 5.922951000  |
| C | 2.416136000  | -3.089731000 | 4.089833000  |
| H | 3.250437000  | -3.780623000 | 3.957606000  |
| C | 2.216081000  | -2.075170000 | 3.152070000  |
| H | 2.897389000  | -1.997075000 | 2.307935000  |

|                                                    |              |              |                                              |
|----------------------------------------------------|--------------|--------------|----------------------------------------------|
| C                                                  | -1.479550000 | 0.860511000  | -2.747010000                                 |
| H                                                  | -1.920484000 | 0.701144000  | -3.740584000                                 |
| H                                                  | -2.235368000 | 1.365119000  | -2.136886000                                 |
| C                                                  | -0.210204000 | 1.688372000  | -2.841815000                                 |
| H                                                  | -0.428254000 | 2.723090000  | -3.130859000                                 |
| H                                                  | 0.447013000  | 1.296844000  | -3.626253000                                 |
| C                                                  | -0.944631000 | 2.248327000  | 2.156836000                                  |
| H                                                  | -0.493614000 | 3.024543000  | 1.532295000                                  |
| H                                                  | -1.708742000 | 2.714080000  | 2.795164000                                  |
| C                                                  | 0.130169000  | 1.572333000  | 2.990173000                                  |
| H                                                  | -0.313746000 | 1.133989000  | 3.889474000                                  |
| H                                                  | 0.874144000  | 2.305095000  | 3.327192000                                  |
| C                                                  | -4.764520000 | -2.306225000 | -3.076236000                                 |
| H                                                  | -5.368635000 | -2.303372000 | -3.985554000                                 |
| Sum of electronic and thermal Energies=            |              |              | -4908.604430                                 |
| Sum of electronic and thermal Enthalpies=          |              |              | -4908.603486                                 |
| Sum of electronic and thermal Free Energies=       |              |              | -4908.765328                                 |
| Lowest vibration frequencies (/cm <sup>-1</sup> ): |              |              | 6.4312            20.1538            26.5133 |

| <sup>4</sup> Me |              |              |              |
|-----------------|--------------|--------------|--------------|
| C               | 3.871204000  | -1.658427000 | 0.366198000  |
| C               | 2.791465000  | -0.787468000 | 0.575996000  |
| C               | 1.690713000  | -0.693297000 | -0.308746000 |
| C               | 1.751627000  | -1.560819000 | -1.426538000 |
| C               | 2.820275000  | -2.436083000 | -1.658384000 |
| C               | 3.892958000  | -2.489418000 | -0.759227000 |
| H               | 4.698108000  | -1.692309000 | 1.084132000  |
| H               | 2.815355000  | -0.158410000 | 1.474044000  |
| H               | 0.923727000  | -1.561797000 | -2.144042000 |
| H               | 2.817032000  | -3.086335000 | -2.539788000 |
| H               | 4.729264000  | -3.173150000 | -0.929925000 |
| Fe              | 0.094735000  | 0.583411000  | -0.077675000 |
| C               | 0.773664000  | 2.326859000  | -0.889178000 |
| C               | -0.587663000 | 2.217458000  | -1.373569000 |
| C               | 0.899162000  | 2.414045000  | 0.531422000  |
| C               | -1.665234000 | 2.759733000  | -0.581492000 |
| C               | -0.256893000 | 2.465802000  | 1.361967000  |
| H               | 1.892242000  | 2.377071000  | 0.985351000  |
| C               | -1.512073000 | 2.852003000  | 0.786126000  |
| H               | -2.625700000 | 2.981063000  | -1.052634000 |
| H               | -0.128322000 | 2.460380000  | 2.445182000  |
| H               | -2.345414000 | 3.137425000  | 1.431216000  |
| H               | -0.731316000 | 2.102331000  | -2.450326000 |
| C               | -1.545202000 | -0.591961000 | 0.106732000  |
| C               | -2.771011000 | -0.503580000 | -0.596706000 |
| C               | -1.470633000 | -1.674507000 | 1.022272000  |
| C               | -3.833905000 | -1.398455000 | -0.404089000 |
| H               | -2.908455000 | 0.300232000  | -1.324511000 |
| C               | -2.524205000 | -2.571961000 | 1.238425000  |
| H               | -0.546820000 | -1.831338000 | 1.587957000  |
| C               | -3.721137000 | -2.439809000 | 0.523100000  |



|                                                    |              |              |                                               |
|----------------------------------------------------|--------------|--------------|-----------------------------------------------|
| H                                                  | -4.756980000 | -1.283534000 | -0.983358000                                  |
| H                                                  | -2.410826000 | -3.382955000 | 1.965997000                                   |
| H                                                  | -4.546638000 | -3.139965000 | 0.680806000                                   |
| C                                                  | 1.944686000  | 2.446658000  | -1.822497000                                  |
| H                                                  | 2.097720000  | 3.495311000  | -2.137605000                                  |
| H                                                  | 2.872343000  | 2.094614000  | -1.351230000                                  |
| H                                                  | 1.790480000  | 1.847464000  | -2.731563000                                  |
| Sum of electronic and thermal Energies=            |              |              | -1998.212152                                  |
| Sum of electronic and thermal Enthalpies=          |              |              | -1998.211208                                  |
| Sum of electronic and thermal Free Energies=       |              |              | -1998.284580                                  |
| Lowest vibration frequencies (/cm <sup>-1</sup> ): |              |              | 28.4216            30.3718            35.0658 |

<sup>24</sup>Me

|    |              |              |              |
|----|--------------|--------------|--------------|
| C  | 3.153474000  | -1.831048000 | 0.763245000  |
| C  | 2.114135000  | -0.899756000 | 0.886377000  |
| C  | 1.324695000  | -0.469960000 | -0.211820000 |
| C  | 1.657924000  | -1.076738000 | -1.450207000 |
| C  | 2.701453000  | -2.000203000 | -1.591804000 |
| C  | 3.464572000  | -2.387621000 | -0.483233000 |
| H  | 3.728117000  | -2.124148000 | 1.649012000  |
| H  | 1.911399000  | -0.489786000 | 1.881105000  |
| H  | 1.077885000  | -0.819909000 | -2.341486000 |
| H  | 2.916720000  | -2.429073000 | -2.576833000 |
| H  | 4.276235000  | -3.113146000 | -0.586638000 |
| Fe | -0.060278000 | 0.905739000  | -0.019549000 |
| C  | 0.749330000  | 2.469811000  | -1.149529000 |
| C  | -0.670858000 | 2.426093000  | -1.287986000 |
| C  | 1.301893000  | 2.478398000  | 0.167494000  |
| C  | -1.504045000 | 2.409291000  | -0.134683000 |
| C  | 0.476052000  | 2.378809000  | 1.322667000  |
| H  | 2.383885000  | 2.379669000  | 0.282179000  |
| C  | -0.938034000 | 2.359400000  | 1.168686000  |
| H  | -2.577939000 | 2.253242000  | -0.255534000 |
| H  | 0.929722000  | 2.301779000  | 2.313829000  |
| H  | -1.586507000 | 2.214972000  | 2.035363000  |
| H  | -1.120345000 | 2.392164000  | -2.283924000 |
| C  | -1.397184000 | -0.525282000 | 0.113717000  |
| C  | -2.290127000 | -0.843077000 | -0.941702000 |
| C  | -1.596707000 | -1.273457000 | 1.302211000  |
| C  | -3.301788000 | -1.805605000 | -0.822447000 |
| H  | -2.197529000 | -0.313636000 | -1.895417000 |
| C  | -2.608397000 | -2.231687000 | 1.440163000  |
| H  | -0.929674000 | -1.107140000 | 2.153441000  |
| C  | -3.475597000 | -2.508594000 | 0.375747000  |
| H  | -3.962811000 | -2.007559000 | -1.672745000 |
| H  | -2.716744000 | -2.775008000 | 2.385449000  |
| H  | -4.263811000 | -3.260078000 | 0.475695000  |
| C  | 1.649186000  | 2.508407000  | -2.356281000 |
| H  | 1.955498000  | 3.542719000  | -2.594292000 |
| H  | 2.560372000  | 1.917811000  | -2.193008000 |
| H  | 1.144162000  | 2.100487000  | -3.243420000 |

Sum of electronic and thermal Energies= -1998.252938  
 Sum of electronic and thermal Enthalpies= -1998.251994  
 Sum of electronic and thermal Free Energies= -1998.320979  
 Lowest vibration frequencies (/cm<sup>-1</sup>) : 25.2900 30.9524 37.0258

| <sup>4</sup> 4 <sub>Ph</sub> |              |              |              |
|------------------------------|--------------|--------------|--------------|
| C                            | 3.788603000  | -1.815638000 | 0.486528000  |
| C                            | 2.755809000  | -0.875833000 | 0.617417000  |
| C                            | 1.689582000  | -0.771587000 | -0.305196000 |
| C                            | 1.727577000  | -1.699261000 | -1.372561000 |
| C                            | 2.750863000  | -2.642984000 | -1.525477000 |
| C                            | 3.793167000  | -2.705728000 | -0.592674000 |
| H                            | 4.593437000  | -1.854401000 | 1.228366000  |
| H                            | 2.792504000  | -0.199599000 | 1.479544000  |
| H                            | 0.920848000  | -1.695406000 | -2.112961000 |
| H                            | 2.735971000  | -3.337415000 | -2.371917000 |
| H                            | 4.595163000  | -3.440835000 | -0.702981000 |
| Fe                           | 0.140784000  | 0.563702000  | -0.153312000 |
| C                            | 0.809594000  | 2.350087000  | -0.938733000 |
| C                            | -0.570080000 | 2.195339000  | -1.385936000 |
| C                            | 0.957345000  | 2.384750000  | 0.489033000  |
| C                            | -1.626860000 | 2.732834000  | -0.561384000 |
| C                            | -0.177039000 | 2.427018000  | 1.341876000  |
| H                            | 1.953602000  | 2.309487000  | 0.927302000  |
| C                            | -1.446382000 | 2.815058000  | 0.802346000  |
| H                            | -2.596335000 | 2.955283000  | -1.012298000 |
| H                            | -0.024908000 | 2.387552000  | 2.421109000  |
| H                            | -2.265562000 | 3.092530000  | 1.468096000  |
| H                            | -0.750589000 | 2.130723000  | -2.459379000 |
| C                            | -1.507569000 | -0.590983000 | 0.070080000  |
| C                            | -2.731427000 | -0.504147000 | -0.634875000 |
| C                            | -1.435523000 | -1.656038000 | 1.003956000  |
| C                            | -3.799044000 | -1.389990000 | -0.426691000 |
| H                            | -2.865170000 | 0.287331000  | -1.376329000 |
| C                            | -2.494456000 | -2.543418000 | 1.234491000  |
| H                            | -0.512242000 | -1.808323000 | 1.570320000  |
| C                            | -3.690469000 | -2.416287000 | 0.517223000  |
| H                            | -4.721535000 | -1.279442000 | -1.007148000 |
| H                            | -2.384966000 | -3.343317000 | 1.974374000  |
| H                            | -4.519325000 | -3.109486000 | 0.686490000  |
| C                            | 1.938966000  | 2.518876000  | -1.869740000 |
| C                            | 1.919871000  | 1.997791000  | -3.183663000 |
| C                            | 3.086982000  | 3.250971000  | -1.491308000 |
| C                            | 2.983786000  | 2.195390000  | -4.061890000 |
| H                            | 1.069490000  | 1.399656000  | -3.508521000 |
| C                            | 4.156253000  | 3.442830000  | -2.368568000 |
| H                            | 3.126595000  | 3.699528000  | -0.498226000 |
| C                            | 4.115366000  | 2.919613000  | -3.664773000 |
| H                            | 2.935510000  | 1.766436000  | -5.065657000 |
| H                            | 5.025146000  | 4.017295000  | -2.037493000 |
| H                            | 4.950248000  | 3.069164000  | -4.352402000 |

Sum of electronic and thermal Energies= -2189.815426  
 Sum of electronic and thermal Enthalpies= -2189.814482  
 Sum of electronic and thermal Free Energies= -2189.896300  
 Lowest vibration frequencies (/cm<sup>-1</sup>) : 15.6695 25.2788 28.1745

|    | <sup>24</sup> P <sub>h</sub> |              |              |
|----|------------------------------|--------------|--------------|
| C  | 2.550491000                  | -2.539734000 | 1.702113000  |
| C  | 1.649671000                  | -1.479603000 | 1.542008000  |
| C  | 1.549842000                  | -0.730282000 | 0.343026000  |
| C  | 2.413868000                  | -1.150830000 | -0.698434000 |
| C  | 3.314440000                  | -2.214655000 | -0.554701000 |
| C  | 3.396171000                  | -2.918526000 | 0.652262000  |
| H  | 2.588416000                  | -3.080585000 | 2.653889000  |
| H  | 0.996390000                  | -1.229848000 | 2.383450000  |
| H  | 2.391263000                  | -0.626476000 | -1.658245000 |
| H  | 3.960474000                  | -2.494538000 | -1.393667000 |
| H  | 4.098556000                  | -3.747976000 | 0.770709000  |
| Fe | 0.378968000                  | 0.830545000  | 0.175531000  |
| C  | 0.901008000                  | 2.439253000  | -1.091692000 |
| C  | -0.452954000                 | 2.561330000  | -0.633198000 |
| C  | 1.902770000                  | 2.225839000  | -0.087171000 |
| C  | -0.784747000                 | 2.468004000  | 0.741493000  |
| C  | 1.573196000                  | 2.118122000  | 1.288304000  |
| H  | 2.923397000                  | 1.993568000  | -0.394565000 |
| C  | 0.217832000                  | 2.196456000  | 1.712740000  |
| H  | -1.838167000                 | 2.459345000  | 1.028406000  |
| H  | 2.348866000                  | 1.820326000  | 1.996276000  |
| H  | -0.048129000                 | 2.050307000  | 2.762014000  |
| H  | -1.261625000                 | 2.665397000  | -1.357242000 |
| C  | -1.113097000                 | -0.388583000 | -0.212077000 |
| C  | -1.293037000                 | -1.033453000 | -1.461391000 |
| C  | -2.133106000                 | -0.642007000 | 0.739001000  |
| C  | -2.406975000                 | -1.830001000 | -1.752832000 |
| H  | -0.529712000                 | -0.919624000 | -2.235546000 |
| C  | -3.247880000                 | -1.446274000 | 0.466783000  |
| H  | -2.057568000                 | -0.192186000 | 1.734076000  |
| C  | -3.400504000                 | -2.043846000 | -0.789478000 |
| H  | -2.495832000                 | -2.297733000 | -2.739121000 |
| H  | -4.005019000                 | -1.606246000 | 1.242131000  |
| H  | -4.269447000                 | -2.669615000 | -1.010155000 |
| C  | 1.250651000                  | 2.569595000  | -2.520262000 |
| C  | 2.480369000                  | 3.142833000  | -2.917086000 |
| C  | 0.376525000                  | 2.153679000  | -3.550909000 |
| C  | 2.820302000                  | 3.286249000  | -4.264148000 |
| H  | 3.168301000                  | 3.503657000  | -2.151650000 |
| C  | 0.711855000                  | 2.307105000  | -4.895518000 |
| H  | -0.563319000                 | 1.669750000  | -3.287711000 |
| C  | 1.938419000                  | 2.873473000  | -5.267829000 |
| H  | 3.780411000                  | 3.735638000  | -4.530319000 |
| H  | 0.013347000                  | 1.964508000  | -5.662778000 |
| H  | 2.201960000                  | 2.986103000  | -6.321493000 |

|                                                     |              |         |         |
|-----------------------------------------------------|--------------|---------|---------|
| Sum of electronic and thermal Energies=             | -2189.858584 |         |         |
| Sum of electronic and thermal Enthalpies=           | -2189.857640 |         |         |
| Sum of electronic and thermal Free Energies=        | -2189.934676 |         |         |
| Lowest vibration frequencies (/cm <sup>-1</sup> ) : | 16.9621      | 29.0836 | 34.1668 |

**<sup>45</sup>**

|    |              |              |              |
|----|--------------|--------------|--------------|
| Fe | 0.061809000  | 0.189000000  | -0.032314000 |
| N  | 1.329903000  | 0.705691000  | -1.387256000 |
| N  | -1.063058000 | -0.319349000 | -1.489836000 |
| C  | 2.755741000  | 0.459339000  | -1.233275000 |
| H  | 3.278167000  | 0.757037000  | -2.164017000 |
| C  | -4.573642000 | 2.842001000  | -1.762625000 |
| H  | -5.371333000 | 3.215259000  | -2.408761000 |
| C  | 4.373656000  | 2.192936000  | -0.302904000 |
| H  | 4.849976000  | 2.247443000  | -1.285229000 |
| C  | 4.181610000  | 2.967579000  | 1.974768000  |
| H  | 4.510814000  | 3.613425000  | 2.792655000  |
| C  | 2.672539000  | 1.224025000  | 1.146058000  |
| C  | 2.340068000  | -1.730688000 | -0.005280000 |
| C  | 3.063974000  | -1.021695000 | -1.005741000 |
| C  | 4.166373000  | -3.090497000 | -1.705670000 |
| H  | 4.871301000  | -3.604703000 | -2.362871000 |
| C  | 3.966146000  | -1.709384000 | -1.823308000 |
| H  | 4.513051000  | -1.149548000 | -2.587774000 |
| C  | -1.400639000 | 0.035863000  | 1.404918000  |
| H  | -0.991266000 | 0.004982000  | 2.418806000  |
| C  | -2.291072000 | -1.088262000 | 1.113418000  |
| C  | 3.430046000  | -3.801205000 | -0.750555000 |
| H  | 3.554021000  | -4.882524000 | -0.651117000 |
| C  | -2.505791000 | 1.850535000  | -0.085278000 |
| C  | 1.561549000  | 0.304740000  | 1.379270000  |
| H  | 1.084771000  | 0.476207000  | 2.349904000  |
| C  | -3.963820000 | 3.682132000  | -0.822783000 |
| H  | -4.282343000 | 4.723156000  | -0.725969000 |
| C  | 3.308071000  | 1.307591000  | -0.114881000 |
| C  | 3.121158000  | 2.082770000  | 2.173374000  |
| H  | 2.632523000  | 2.035901000  | 3.150053000  |
| C  | -3.438507000 | -3.107147000 | 1.909619000  |
| H  | -3.652590000 | -3.804291000 | 2.723409000  |
| C  | -3.101600000 | 1.017565000  | -1.071915000 |
| C  | 4.822841000  | 3.021008000  | 0.732177000  |
| H  | 5.653219000  | 3.710481000  | 0.564644000  |
| C  | -2.948328000 | 3.191179000  | -0.002682000 |
| H  | -2.487959000 | 3.848891000  | 0.739048000  |
| C  | -1.473085000 | 1.359508000  | 0.816203000  |
| H  | -1.006763000 | 2.138386000  | 1.428586000  |
| C  | -2.594317000 | -2.019609000 | 2.132991000  |
| H  | -2.163529000 | -1.866915000 | 3.125515000  |
| C  | -4.010406000 | -3.296781000 | 0.648014000  |
| H  | -4.669812000 | -4.146089000 | 0.457238000  |
| C  | -2.857618000 | -1.303312000 | -0.170047000 |

|                                                     |              |              |                                               |
|-----------------------------------------------------|--------------|--------------|-----------------------------------------------|
| C                                                   | -4.125053000 | 1.521155000  | -1.880671000                                  |
| H                                                   | -4.565657000 | 0.867129000  | -2.638826000                                  |
| C                                                   | 0.868943000  | 0.297452000  | -2.702728000                                  |
| H                                                   | 1.181218000  | -0.739158000 | -2.945920000                                  |
| H                                                   | 1.288279000  | 0.951624000  | -3.498171000                                  |
| C                                                   | 2.535911000  | -3.128319000 | 0.081107000                                   |
| H                                                   | 1.974094000  | -3.686964000 | 0.833735000                                   |
| C                                                   | -3.709848000 | -2.392002000 | -0.376960000                                  |
| H                                                   | -4.132713000 | -2.546078000 | -1.372741000                                  |
| C                                                   | -0.646654000 | 0.356386000  | -2.697867000                                  |
| H                                                   | -0.973476000 | 1.416614000  | -2.728015000                                  |
| H                                                   | -1.062515000 | -0.129943000 | -3.607119000                                  |
| C                                                   | -2.500432000 | -0.367001000 | -1.306367000                                  |
| H                                                   | -2.969107000 | -0.769413000 | -2.227588000                                  |
| C                                                   | 1.426364000  | -1.066098000 | 0.916461000                                   |
| H                                                   | 0.924712000  | -1.740766000 | 1.616358000                                   |
| Sum of electronic and thermal Energies=             |              |              | -2607.542545                                  |
| Sum of electronic and thermal Enthalpies=           |              |              | -2607.541601                                  |
| Sum of electronic and thermal Free Energies=        |              |              | -2607.626924                                  |
| Lowest vibration frequencies (/cm <sup>-1</sup> ) : |              |              | 16.9621            29.0836            34.1668 |

<sup>25</sup>

|    |              |              |              |
|----|--------------|--------------|--------------|
| Fe | 0.000027000  | -0.000079000 | 0.043148000  |
| N  | 1.197177000  | 0.351838000  | -1.321478000 |
| N  | -1.197163000 | -0.351797000 | -1.321499000 |
| C  | 2.640032000  | 0.279198000  | -1.158373000 |
| H  | 3.135424000  | 0.528959000  | -2.115687000 |
| C  | -4.439076000 | 3.123515000  | -1.086000000 |
| H  | -5.217034000 | 3.654398000  | -1.639625000 |
| C  | 4.127624000  | 2.195802000  | -0.405040000 |
| H  | 4.613016000  | 2.163424000  | -1.384153000 |
| C  | 3.867760000  | 3.211376000  | 1.766109000  |
| H  | 4.149807000  | 3.963271000  | 2.507569000  |
| C  | 2.462143000  | 1.299898000  | 1.135812000  |
| C  | 2.396863000  | -1.740974000 | 0.313168000  |
| C  | 3.088865000  | -1.119139000 | -0.755021000 |
| C  | 4.439456000  | -3.123222000 | -1.086410000 |
| H  | 5.217518000  | -3.653931000 | -1.640053000 |
| C  | 4.102217000  | -1.807888000 | -1.428445000 |
| H  | 4.623633000  | -1.311861000 | -2.251768000 |
| C  | -1.403776000 | -0.353561000 | 1.476173000  |
| H  | -0.965362000 | -0.550816000 | 2.462781000  |
| C  | -2.462164000 | -1.300138000 | 1.135671000  |
| C  | 3.751162000  | -3.753501000 | -0.045785000 |
| H  | 3.992258000  | -4.782765000 | 0.231120000  |
| C  | -2.396712000 | 1.740841000  | 0.313492000  |
| C  | 1.403853000  | 0.353173000  | 1.476204000  |
| H  | 0.965456000  | 0.550243000  | 2.462857000  |
| C  | -3.750792000 | 3.753558000  | -0.045227000 |
| H  | -3.991792000 | 4.782807000  | 0.231817000  |
| C  | 3.108502000  | 1.280435000  | -0.125560000 |

|                                                     |              |              |              |
|-----------------------------------------------------|--------------|--------------|--------------|
| C                                                   | 2.860364000  | 2.292128000  | 2.060073000  |
| H                                                   | 2.369661000  | 2.324308000  | 3.036222000  |
| C                                                   | -3.868142000 | -3.211400000 | 1.765814000  |
| H                                                   | -4.150319000 | -3.963313000 | 2.507207000  |
| C                                                   | -3.088728000 | 1.119235000  | -0.754821000 |
| C                                                   | 4.516906000  | 3.163835000  | 0.527756000  |
| H                                                   | 5.304441000  | 3.879949000  | 0.283214000  |
| C                                                   | -2.748267000 | 3.065464000  | 0.643118000  |
| H                                                   | -2.221758000 | 3.558167000  | 1.464347000  |
| C                                                   | -1.349561000 | 1.043433000  | 1.078437000  |
| H                                                   | -0.875374000 | 1.698719000  | 1.817663000  |
| C                                                   | -2.860513000 | -2.292420000 | 2.059821000  |
| H                                                   | -2.369765000 | -2.324817000 | 3.035941000  |
| C                                                   | -4.517373000 | -3.163549000 | 0.527518000  |
| H                                                   | -5.305110000 | -3.879432000 | 0.282955000  |
| C                                                   | -3.108575000 | -1.280399000 | -0.125666000 |
| C                                                   | -4.101965000 | 1.808192000  | -1.428205000 |
| H                                                   | -4.623377000 | 1.312347000  | -2.251639000 |
| C                                                   | 0.751272000  | -0.097781000 | -2.624028000 |
| H                                                   | 0.986269000  | -1.170688000 | -2.796296000 |
| H                                                   | 1.232790000  | 0.471872000  | -3.446181000 |
| C                                                   | 2.748519000  | -3.065618000 | 0.642599000  |
| H                                                   | 2.222020000  | -3.558498000 | 1.463728000  |
| C                                                   | -4.127917000 | -2.195507000 | -0.405195000 |
| H                                                   | -4.613378000 | -2.162887000 | -1.384265000 |
| C                                                   | -0.751281000 | 0.098008000  | -2.623994000 |
| H                                                   | -0.986277000 | 1.170941000  | -2.796099000 |
| H                                                   | -1.232822000 | -0.471522000 | -3.446219000 |
| C                                                   | -2.640012000 | -0.279085000 | -1.158361000 |
| H                                                   | -3.135434000 | -0.528682000 | -2.115703000 |
| C                                                   | 1.349673000  | -1.043749000 | 1.078225000  |
| H                                                   | 0.875519000  | -1.699174000 | 1.817349000  |
| Sum of electronic and thermal Energies=             |              |              | -2607.570492 |
| Sum of electronic and thermal Enthalpies=           |              |              | -2607.569548 |
| Sum of electronic and thermal Free Energies=        |              |              | -2607.651540 |
| Lowest vibration frequencies (/cm <sup>-1</sup> ) : | 31.3694      | 41.3394      | 48.6840      |

<sup>4</sup>6 (computed at the OPBE-d3bj level)

|    |              |              |              |
|----|--------------|--------------|--------------|
| Fe | 0.996951000  | 0.132110000  | 0.007201000  |
| C  | 1.413617000  | 1.411478000  | 3.983768000  |
| C  | 1.792785000  | 0.099372000  | 4.132784000  |
| C  | 4.718134000  | -1.657637000 | -0.625030000 |
| C  | 5.132202000  | -0.440071000 | -0.147070000 |
| C  | -2.822921000 | 1.824802000  | -0.048821000 |
| C  | -3.031282000 | 0.824361000  | 0.866677000  |
| C  | -0.110148000 | -0.949830000 | -3.899645000 |
| C  | 0.882915000  | -0.044678000 | -4.186532000 |
| C  | -0.832111000 | 0.693142000  | 0.195516000  |
| C  | 2.829904000  | -0.418148000 | -0.178740000 |
| C  | 1.280378000  | 0.419359000  | 1.920971000  |
| C  | 0.708196000  | -0.172180000 | -1.904097000 |

|   |              |              |              |
|---|--------------|--------------|--------------|
| C | 0.574941000  | 2.788828000  | 2.016985000  |
| H | 0.571181000  | 2.508750000  | 0.950737000  |
| C | 2.085599000  | -1.840892000 | 2.514679000  |
| H | 1.764786000  | -1.893756000 | 1.461709000  |
| C | 2.487988000  | 1.316260000  | -2.756673000 |
| H | 2.448546000  | 1.473561000  | -1.665873000 |
| C | -1.175392000 | -1.763683000 | -1.737575000 |
| H | -0.823434000 | -1.592955000 | -0.706851000 |
| C | 3.914144000  | 1.619475000  | 0.707325000  |
| H | 2.836255000  | 1.843140000  | 0.631393000  |
| C | 2.445013000  | -2.668242000 | -1.134022000 |
| H | 1.453139000  | -2.279194000 | -0.848010000 |
| C | -1.538030000 | -0.942098000 | 1.913998000  |
| H | -0.516567000 | -1.228491000 | 1.611072000  |
| C | -0.833771000 | 2.528050000  | -1.462382000 |
| H | 0.213087000  | 2.192549000  | -1.370229000 |
| N | -1.819075000 | 0.155739000  | 1.000454000  |
| N | -1.492110000 | 1.728060000  | -0.440171000 |
| N | -0.203414000 | -1.003734000 | -2.513662000 |
| N | 1.366327000  | 0.408057000  | -2.964527000 |
| N | 1.711106000  | -0.478265000 | 2.871373000  |
| N | 1.103274000  | 1.580863000  | 2.639826000  |
| N | 3.327964000  | -1.623827000 | -0.635042000 |
| N | 3.978974000  | 0.291305000  | 0.116110000  |
| C | 2.154507000  | -0.610984000 | 5.381968000  |
| H | 3.038714000  | -1.244084000 | 5.264939000  |
| H | 2.375918000  | 0.115604000  | 6.169598000  |
| H | 1.332688000  | -1.247153000 | 5.737681000  |
| C | 1.393631000  | 2.477948000  | 5.012155000  |
| H | 2.255839000  | 3.151487000  | 4.913461000  |
| H | 0.487192000  | 3.088333000  | 4.967737000  |
| H | 1.436576000  | 2.029781000  | 6.009470000  |
| C | -4.297142000 | 0.450400000  | 1.540298000  |
| H | -5.025355000 | 1.260502000  | 1.436088000  |
| H | -4.739572000 | -0.452115000 | 1.097195000  |
| H | -4.168429000 | 0.265124000  | 2.610862000  |
| C | -3.779038000 | 2.861545000  | -0.503692000 |
| H | -3.556602000 | 3.841091000  | -0.059237000 |
| H | -3.783851000 | 2.983527000  | -1.591134000 |
| H | -4.794239000 | 2.585441000  | -0.203115000 |
| C | -0.894487000 | -1.778770000 | -4.844490000 |
| H | -0.775676000 | -1.393305000 | -5.861576000 |
| H | -0.552531000 | -2.822373000 | -4.842976000 |
| H | -1.964987000 | -1.778848000 | -4.618374000 |
| C | 1.333723000  | 0.430222000  | -5.515572000 |
| H | 0.966433000  | 1.443154000  | -5.727802000 |
| H | 2.423681000  | 0.443684000  | -5.610214000 |
| H | 0.946665000  | -0.232102000 | -6.295718000 |
| C | 6.519287000  | 0.055933000  | 0.012033000  |
| H | 6.690948000  | 0.521576000  | 0.987279000  |
| H | 7.222047000  | -0.777928000 | -0.078303000 |

|   |              |              |              |
|---|--------------|--------------|--------------|
| H | 6.778561000  | 0.792550000  | -0.760132000 |
| C | 5.550696000  | -2.824973000 | -1.000227000 |
| H | 5.238909000  | -3.277550000 | -1.946307000 |
| H | 6.593521000  | -2.514275000 | -1.115747000 |
| H | 5.520929000  | -3.607845000 | -0.230422000 |
| C | 4.675352000  | 2.676468000  | -0.072182000 |
| H | 4.365112000  | 3.665372000  | 0.286908000  |
| H | 5.757509000  | 2.602678000  | 0.069479000  |
| H | 4.453534000  | 2.618879000  | -1.139881000 |
| C | 4.307158000  | 1.591746000  | 2.172773000  |
| H | 4.148231000  | 2.576723000  | 2.623279000  |
| H | 3.708133000  | 0.865774000  | 2.722236000  |
| H | 5.365078000  | 1.340540000  | 2.300972000  |
| C | 2.643374000  | -4.013298000 | -0.457918000 |
| H | 1.786405000  | -4.653505000 | -0.700448000 |
| H | 3.544109000  | -4.527767000 | -0.804969000 |
| H | 2.692047000  | -3.908999000 | 0.628169000  |
| C | 2.511909000  | -2.769832000 | -2.646736000 |
| H | 1.801734000  | -3.522731000 | -3.004009000 |
| H | 2.262335000  | -1.816043000 | -3.110864000 |
| H | 3.507926000  | -3.071537000 | -2.986204000 |
| C | 3.803717000  | 0.645774000  | -3.103664000 |
| H | 4.638136000  | 1.306637000  | -2.848203000 |
| H | 3.921281000  | -0.282384000 | -2.544416000 |
| H | 3.875309000  | 0.423913000  | -4.173455000 |
| C | 2.318759000  | 2.658968000  | -3.442479000 |
| H | 3.077555000  | 3.347249000  | -3.051343000 |
| H | 2.460760000  | 2.596482000  | -4.524957000 |
| H | 1.335241000  | 3.087258000  | -3.237979000 |
| C | -1.142204000 | -3.255324000 | -2.015623000 |
| H | -1.711727000 | -3.767815000 | -1.231010000 |
| H | -1.601500000 | -3.512628000 | -2.974424000 |
| H | -0.119462000 | -3.638094000 | -1.998834000 |
| C | -2.565969000 | -1.174198000 | -1.880895000 |
| H | -3.274778000 | -1.733698000 | -1.261791000 |
| H | -2.578048000 | -0.133111000 | -1.558282000 |
| H | -2.922258000 | -1.226022000 | -2.914683000 |
| C | -0.854351000 | 3.051850000  | 2.452044000  |
| H | -0.915715000 | 3.312521000  | 3.513724000  |
| H | -1.266403000 | 3.891510000  | 1.883301000  |
| H | -1.480382000 | 2.178716000  | 2.268168000  |
| C | 1.469470000  | 4.002159000  | 2.189351000  |
| H | 1.115425000  | 4.793151000  | 1.517442000  |
| H | 1.443123000  | 4.401669000  | 3.207121000  |
| H | 2.503814000  | 3.771479000  | 1.925973000  |
| C | 1.333258000  | -2.900162000 | 3.298780000  |
| H | 1.501191000  | -3.872678000 | 2.820686000  |
| H | 1.679111000  | -2.978992000 | 4.333192000  |
| H | 0.259247000  | -2.702449000 | 3.299111000  |
| C | 3.589933000  | -2.028370000 | 2.575710000  |
| H | 3.853587000  | -3.034703000 | 2.234903000  |



|                                                     |              |              |              |
|-----------------------------------------------------|--------------|--------------|--------------|
| H                                                   | 4.095523000  | -1.308160000 | 1.932444000  |
| H                                                   | 3.971098000  | -1.917247000 | 3.595892000  |
| C                                                   | -2.448480000 | -2.141903000 | 1.722777000  |
| H                                                   | -2.006160000 | -3.002450000 | 2.239335000  |
| H                                                   | -3.444452000 | -1.982834000 | 2.146059000  |
| H                                                   | -2.550720000 | -2.394959000 | 0.665725000  |
| C                                                   | -1.506076000 | -0.468760000 | 3.355305000  |
| H                                                   | -1.244915000 | -1.301289000 | 4.016831000  |
| H                                                   | -0.767666000 | 0.321336000  | 3.490009000  |
| H                                                   | -2.481927000 | -0.089870000 | 3.675287000  |
| C                                                   | -0.880141000 | 4.021638000  | -1.195213000 |
| H                                                   | -0.159077000 | 4.516814000  | -1.856969000 |
| H                                                   | -1.863419000 | 4.453830000  | -1.402096000 |
| H                                                   | -0.603478000 | 4.247855000  | -0.163192000 |
| C                                                   | -1.340669000 | 2.172862000  | -2.847500000 |
| H                                                   | -0.766622000 | 2.711651000  | -3.608141000 |
| H                                                   | -1.237307000 | 1.104290000  | -3.033205000 |
| H                                                   | -2.392833000 | 2.447611000  | -2.973302000 |
| Sum of electronic and thermal Energies=             |              |              | -3425.327060 |
| Sum of electronic and thermal Enthalpies=           |              |              | -3425.326116 |
| Sum of electronic and thermal Free Energies=        |              |              | -3425.482701 |
| Lowest vibration frequencies (/cm <sup>-1</sup> ) : | 28.6543      | 44.4928      | 50.2903      |

<sup>26</sup> (computed at the OPBE-d3bj level)

|    |              |              |              |
|----|--------------|--------------|--------------|
| Fe | 0.997847000  | 0.129759000  | 0.007274000  |
| C  | 1.422192000  | 1.412890000  | 3.953892000  |
| C  | 1.761225000  | 0.092574000  | 4.108616000  |
| C  | 4.712073000  | -1.663661000 | -0.613464000 |
| C  | 5.126026000  | -0.434679000 | -0.165811000 |
| C  | -2.812224000 | 1.824990000  | -0.037622000 |
| C  | -3.029266000 | 0.804223000  | 0.852900000  |
| C  | -0.087296000 | -0.957896000 | -3.871171000 |
| C  | 0.879684000  | -0.028391000 | -4.160060000 |
| C  | -0.824020000 | 0.681763000  | 0.193546000  |
| C  | 2.821350000  | -0.420069000 | -0.177598000 |
| C  | 1.275427000  | 0.419238000  | 1.879359000  |
| C  | 0.718298000  | -0.159985000 | -1.864667000 |
| C  | 0.600304000  | 2.787712000  | 1.976286000  |
| H  | 0.571962000  | 2.499460000  | 0.916733000  |
| C  | 2.044603000  | -1.843171000 | 2.481232000  |
| H  | 1.751898000  | -1.886079000 | 1.423528000  |
| C  | 2.471716000  | 1.342129000  | -2.721883000 |
| H  | 2.451083000  | 1.476028000  | -1.631731000 |
| C  | -1.140423000 | -1.769180000 | -1.700258000 |
| H  | -0.804054000 | -1.577338000 | -0.672334000 |
| C  | 3.891995000  | 1.617334000  | 0.699330000  |
| H  | 2.813993000  | 1.824368000  | 0.654188000  |
| C  | 2.425007000  | -2.657563000 | -1.126353000 |
| H  | 1.438185000  | -2.245383000 | -0.875269000 |
| C  | -1.515610000 | -0.948726000 | 1.907442000  |
| H  | -0.483425000 | -1.205886000 | 1.633467000  |

|   |              |              |              |
|---|--------------|--------------|--------------|
| C | -0.812042000 | 2.515127000  | -1.452411000 |
| H | 0.222825000  | 2.151883000  | -1.385425000 |
| N | -1.816280000 | 0.132408000  | 0.979288000  |
| N | -1.477790000 | 1.728994000  | -0.423112000 |
| N | -0.169262000 | -1.017058000 | -2.482390000 |
| N | 1.351999000  | 0.435624000  | -2.935256000 |
| N | 1.668840000  | -0.484298000 | 2.844900000  |
| N | 1.130202000  | 1.584985000  | 2.603552000  |
| N | 3.320301000  | -1.629898000 | -0.613878000 |
| N | 3.969501000  | 0.296058000  | 0.092849000  |
| C | 2.086510000  | -0.630493000 | 5.360357000  |
| H | 2.977915000  | -1.258918000 | 5.268200000  |
| H | 2.277032000  | 0.087337000  | 6.163842000  |
| H | 1.256767000  | -1.274483000 | 5.682234000  |
| C | 1.436933000  | 2.488039000  | 4.973251000  |
| H | 2.303289000  | 3.151812000  | 4.846999000  |
| H | 0.536286000  | 3.109264000  | 4.949639000  |
| H | 1.502305000  | 2.048706000  | 5.973247000  |
| C | -4.301560000 | 0.403399000  | 1.497511000  |
| H | -5.043620000 | 1.198805000  | 1.378924000  |
| H | -4.715514000 | -0.505175000 | 1.038952000  |
| H | -4.195694000 | 0.214989000  | 2.570550000  |
| C | -3.754040000 | 2.885433000  | -0.465635000 |
| H | -3.496469000 | 3.855865000  | -0.020360000 |
| H | -3.783890000 | 3.015616000  | -1.552298000 |
| H | -4.767631000 | 2.632457000  | -0.140423000 |
| C | -0.852383000 | -1.810715000 | -4.810272000 |
| H | -0.722543000 | -1.444987000 | -5.833323000 |
| H | -0.501753000 | -2.851286000 | -4.784553000 |
| H | -1.926824000 | -1.816405000 | -4.600573000 |
| C | 1.307568000  | 0.469797000  | -5.488050000 |
| H | 0.939930000  | 1.487928000  | -5.674193000 |
| H | 2.395785000  | 0.481589000  | -5.607538000 |
| H | 0.901461000  | -0.175030000 | -6.273199000 |
| C | 6.509691000  | 0.080356000  | -0.044577000 |
| H | 6.701802000  | 0.558466000  | 0.921187000  |
| H | 7.221533000  | -0.744419000 | -0.146527000 |
| H | 6.737830000  | 0.812604000  | -0.830738000 |
| C | 5.540524000  | -2.842475000 | -0.958702000 |
| H | 5.255151000  | -3.296968000 | -1.912819000 |
| H | 6.590407000  | -2.545353000 | -1.040609000 |
| H | 5.476459000  | -3.620447000 | -0.186054000 |
| C | 4.629183000  | 2.694706000  | -0.075453000 |
| H | 4.319887000  | 3.676598000  | 0.302235000  |
| H | 5.713361000  | 2.623882000  | 0.051003000  |
| H | 4.395806000  | 2.650521000  | -1.140877000 |
| C | 4.305548000  | 1.574573000  | 2.159257000  |
| H | 4.146307000  | 2.552803000  | 2.623998000  |
| H | 3.714826000  | 0.839014000  | 2.705449000  |
| H | 5.366131000  | 1.326543000  | 2.267934000  |
| C | 2.580687000  | -4.004533000 | -0.443828000 |

|   |              |              |              |
|---|--------------|--------------|--------------|
| H | 1.728931000  | -4.638944000 | -0.716703000 |
| H | 3.489212000  | -4.524258000 | -0.761195000 |
| H | 2.594949000  | -3.902503000 | 0.643096000  |
| C | 2.523015000  | -2.763312000 | -2.637594000 |
| H | 1.788488000  | -3.483243000 | -3.012468000 |
| H | 2.323985000  | -1.798422000 | -3.104163000 |
| H | 3.513026000  | -3.108916000 | -2.951021000 |
| C | 3.786501000  | 0.679414000  | -3.091418000 |
| H | 4.624215000  | 1.336841000  | -2.837894000 |
| H | 3.909105000  | -0.255724000 | -2.544632000 |
| H | 3.842813000  | 0.471325000  | -4.164474000 |
| C | 2.298931000  | 2.695863000  | -3.385552000 |
| H | 3.059419000  | 3.382183000  | -2.994583000 |
| H | 2.433434000  | 2.641945000  | -4.469386000 |
| H | 1.315569000  | 3.119669000  | -3.173325000 |
| C | -1.107543000 | -3.265356000 | -1.955265000 |
| H | -1.683213000 | -3.770851000 | -1.170785000 |
| H | -1.561909000 | -3.529294000 | -2.914588000 |
| H | -0.086600000 | -3.651105000 | -1.932281000 |
| C | -2.534541000 | -1.188994000 | -1.856752000 |
| H | -3.233606000 | -1.706938000 | -1.192384000 |
| H | -2.540462000 | -0.130160000 | -1.597662000 |
| H | -2.903224000 | -1.304298000 | -2.880712000 |
| C | -0.823780000 | 3.059420000  | 2.427077000  |
| H | -0.867707000 | 3.315826000  | 3.490225000  |
| H | -1.239448000 | 3.903003000  | 1.866773000  |
| H | -1.455403000 | 2.188922000  | 2.248472000  |
| C | 1.496415000  | 4.003106000  | 2.129383000  |
| H | 1.143169000  | 4.791353000  | 1.454066000  |
| H | 1.471264000  | 4.407805000  | 3.145099000  |
| H | 2.530802000  | 3.769770000  | 1.869994000  |
| C | 1.283297000  | -2.912753000 | 3.243168000  |
| H | 1.455046000  | -3.882194000 | 2.760502000  |
| H | 1.621383000  | -2.998579000 | 4.279551000  |
| H | 0.209695000  | -2.715268000 | 3.239376000  |
| C | 3.548372000  | -2.034594000 | 2.564532000  |
| H | 3.819138000  | -3.037967000 | 2.220527000  |
| H | 4.062752000  | -1.307969000 | 1.935413000  |
| H | 3.909240000  | -1.929912000 | 3.592376000  |
| C | -2.390437000 | -2.175510000 | 1.723659000  |
| H | -1.955154000 | -3.008745000 | 2.288108000  |
| H | -3.404454000 | -2.019383000 | 2.102516000  |
| H | -2.448813000 | -2.468572000 | 0.673778000  |
| C | -1.511525000 | -0.451925000 | 3.341862000  |
| H | -1.211626000 | -1.259335000 | 4.017522000  |
| H | -0.807728000 | 0.372126000  | 3.461183000  |
| H | -2.504905000 | -0.113081000 | 3.651711000  |
| C | -0.823148000 | 4.009663000  | -1.186958000 |
| H | -0.110667000 | 4.494720000  | -1.864774000 |
| H | -1.804690000 | 4.454614000  | -1.373506000 |
| H | -0.523518000 | 4.233984000  | -0.161462000 |

|                                                     |              |             |              |              |
|-----------------------------------------------------|--------------|-------------|--------------|--------------|
| C                                                   | -1.343743000 | 2.169564000 | -2.831254000 |              |
| H                                                   | -0.777562000 | 2.707298000 | -3.598429000 |              |
| H                                                   | -1.246360000 | 1.100930000 | -3.021915000 |              |
| H                                                   | -2.395777000 | 2.451830000 | -2.937221000 |              |
| Sum of electronic and thermal Energies=             |              |             |              | -3425.383814 |
| Sum of electronic and thermal Enthalpies=           |              |             |              | -3425.382870 |
| Sum of electronic and thermal Free Energies=        |              |             |              | -3425.536720 |
| Lowest vibration frequencies (/cm <sup>-1</sup> ) : | 41.2590      | 53.0992     | 57.2653      |              |

<sup>47</sup>

|    |              |              |              |
|----|--------------|--------------|--------------|
| Fe | -1.265074000 | -0.431000000 | -0.389362000 |
| N  | -3.122522000 | -0.610607000 | -0.019341000 |
| C  | -3.915027000 | 0.301596000  | 0.655325000  |
| C  | -3.892583000 | -1.739218000 | -0.240701000 |
| C  | -5.167087000 | -0.250435000 | 0.879329000  |
| C  | -5.152805000 | -1.554201000 | 0.307140000  |
| H  | -6.006304000 | 0.232644000  | 1.374700000  |
| H  | -5.978725000 | -2.261452000 | 0.280232000  |
| P  | -1.468497000 | -2.622694000 | -1.034312000 |
| P  | -1.517981000 | 1.540724000  | 0.762997000  |
| C  | -3.370571000 | 1.669746000  | 0.886143000  |
| H  | -3.695919000 | 2.106831000  | 1.840552000  |
| H  | -3.709845000 | 2.357921000  | 0.094802000  |
| C  | -3.317931000 | -2.823737000 | -1.085940000 |
| H  | -3.633634000 | -2.705127000 | -2.135648000 |
| H  | -3.639471000 | -3.827389000 | -0.775467000 |
| C  | 0.164755000  | 0.588517000  | -2.710828000 |
| C  | -2.153488000 | 0.729435000  | -3.115750000 |
| C  | 0.406327000  | 1.145575000  | -4.001456000 |
| C  | -1.975774000 | 1.272586000  | -4.382756000 |
| H  | -3.154532000 | 0.546504000  | -2.720327000 |
| C  | -0.645589000 | 1.483335000  | -4.828045000 |
| H  | 1.429393000  | 1.306474000  | -4.339039000 |
| H  | -2.837118000 | 1.523183000  | -5.000267000 |
| H  | -0.451195000 | 1.908212000  | -5.814300000 |
| C  | 1.165971000  | 0.198751000  | -1.773603000 |
| C  | 1.591482000  | -0.721708000 | 0.365281000  |
| C  | 2.572841000  | 0.305633000  | -1.971975000 |
| C  | 2.967023000  | -0.632577000 | 0.215107000  |
| H  | 1.165538000  | -1.129146000 | 1.283365000  |
| C  | 3.466542000  | -0.097214000 | -1.002969000 |
| H  | 2.945561000  | 0.716324000  | -2.909211000 |
| H  | 3.626496000  | -0.967563000 | 1.014035000  |
| H  | 4.540250000  | -0.005451000 | -1.172056000 |
| N  | 0.695528000  | -0.331525000 | -0.565084000 |
| N  | -1.146451000 | 0.391804000  | -2.291047000 |
| C  | -0.926947000 | 3.133040000  | -0.062152000 |
| C  | -1.750274000 | 4.417651000  | 0.141570000  |
| C  | 0.567514000  | 3.408897000  | 0.184417000  |
| H  | -1.027603000 | 2.855770000  | -1.124451000 |
| C  | -1.234623000 | 5.541478000  | -0.766809000 |

|   |              |              |              |
|---|--------------|--------------|--------------|
| H | -1.699107000 | 4.751163000  | 1.188302000  |
| H | -2.812507000 | 4.245077000  | -0.078904000 |
| C | 1.077419000  | 4.538764000  | -0.717071000 |
| H | 0.726735000  | 3.698280000  | 1.234800000  |
| H | 1.162910000  | 2.504956000  | 0.009579000  |
| C | 0.253635000  | 5.815367000  | -0.551513000 |
| H | -1.823653000 | 6.455586000  | -0.589134000 |
| H | -1.405819000 | 5.260432000  | -1.819761000 |
| H | 2.138254000  | 4.734949000  | -0.493979000 |
| H | 1.036360000  | 4.207236000  | -1.767569000 |
| H | 0.603164000  | 6.590520000  | -1.251719000 |
| H | 0.406812000  | 6.221436000  | 0.463318000  |
| C | -0.900896000 | 1.562288000  | 2.544767000  |
| C | -1.220535000 | 2.799967000  | 3.399116000  |
| C | -1.359319000 | 0.291508000  | 3.279076000  |
| H | 0.195215000  | 1.501573000  | 2.426924000  |
| C | -0.603100000 | 2.690030000  | 4.799933000  |
| H | -2.311993000 | 2.911033000  | 3.498577000  |
| H | -0.853373000 | 3.715244000  | 2.919850000  |
| C | -0.739533000 | 0.180980000  | 4.675054000  |
| H | -2.457033000 | 0.288195000  | 3.364664000  |
| H | -1.101911000 | -0.595264000 | 2.687097000  |
| C | -1.036923000 | 1.416372000  | 5.523680000  |
| H | -0.876031000 | 3.579548000  | 5.390045000  |
| H | 0.496699000  | 2.702646000  | 4.711370000  |
| H | -1.114442000 | -0.727051000 | 5.173366000  |
| H | 0.353067000  | 0.057146000  | 4.580586000  |
| H | -0.535300000 | 1.342718000  | 6.501381000  |
| H | -2.119565000 | 1.463842000  | 5.731112000  |
| C | -0.832011000 | -3.102460000 | -2.746606000 |
| C | 0.672181000  | -3.431230000 | -2.746644000 |
| C | -1.613880000 | -4.152961000 | -3.555667000 |
| H | -0.946014000 | -2.143388000 | -3.278100000 |
| C | 1.214414000  | -3.542340000 | -4.176018000 |
| H | 0.846941000  | -4.386707000 | -2.228040000 |
| H | 1.235878000  | -2.664849000 | -2.200935000 |
| C | -1.064264000 | -4.253175000 | -4.984545000 |
| H | -1.548497000 | -5.140991000 | -3.077648000 |
| H | -2.681654000 | -3.899511000 | -3.604406000 |
| C | 0.432622000  | -4.561985000 | -5.003446000 |
| H | 2.282128000  | -3.811272000 | -4.142962000 |
| H | 1.156167000  | -2.553650000 | -4.659961000 |
| H | -1.622930000 | -5.024344000 | -5.538946000 |
| H | -1.246526000 | -3.299538000 | -5.508282000 |
| H | 0.803920000  | -4.580007000 | -6.040348000 |
| H | 0.602670000  | -5.573445000 | -4.595267000 |
| C | -0.860323000 | -3.930970000 | 0.182557000  |
| C | -1.353084000 | -3.611134000 | 1.603573000  |
| C | -1.157041000 | -5.401494000 | -0.152400000 |
| H | 0.235125000  | -3.792746000 | 0.171437000  |
| C | -0.746316000 | -4.557316000 | 2.644179000  |

|                                                    |              |              |              |
|----------------------------------------------------|--------------|--------------|--------------|
| H                                                  | -2.450978000 | -3.682331000 | 1.640807000  |
| H                                                  | -1.112044000 | -2.571558000 | 1.857412000  |
| C                                                  | -0.555724000 | -6.351993000 | 0.891552000  |
| H                                                  | -2.246207000 | -5.560920000 | -0.193179000 |
| H                                                  | -0.762668000 | -5.665111000 | -1.140643000 |
| C                                                  | -1.024046000 | -6.021748000 | 2.307745000  |
| H                                                  | -1.143527000 | -4.310548000 | 3.641512000  |
| H                                                  | 0.344326000  | -4.395216000 | 2.693604000  |
| H                                                  | -0.815953000 | -7.390752000 | 0.632287000  |
| H                                                  | 0.544979000  | -6.288400000 | 0.846567000  |
| H                                                  | -0.532851000 | -6.684187000 | 3.037737000  |
| H                                                  | -2.107087000 | -6.215769000 | 2.389450000  |
| Sum of electronic and thermal Energies=            |              |              | -3668.461023 |
| Sum of electronic and thermal Enthalpies=          |              |              | -3668.460078 |
| Sum of electronic and thermal Free Energies=       |              |              | -3668.587693 |
| Lowest vibration frequencies (/cm <sup>-1</sup> ): | 7.2292       | 19.6049      | 35.5734      |

27

|    |              |              |              |
|----|--------------|--------------|--------------|
| Fe | -1.158569000 | -0.354047000 | -0.556911000 |
| N  | -3.056944000 | -0.546528000 | -0.158127000 |
| C  | -3.840117000 | 0.351916000  | 0.528166000  |
| C  | -3.822945000 | -1.670301000 | -0.365383000 |
| C  | -5.099430000 | -0.198739000 | 0.767508000  |
| C  | -5.088466000 | -1.494369000 | 0.194963000  |
| H  | -5.928373000 | 0.283529000  | 1.281246000  |
| H  | -5.906390000 | -2.211644000 | 0.181187000  |
| P  | -1.385539000 | -2.614148000 | -0.993638000 |
| P  | -1.427066000 | 1.520143000  | 0.765369000  |
| C  | -3.278653000 | 1.707939000  | 0.786288000  |
| H  | -3.649656000 | 2.156727000  | 1.718194000  |
| H  | -3.541277000 | 2.407660000  | -0.025602000 |
| C  | -3.231707000 | -2.770797000 | -1.177198000 |
| H  | -3.459911000 | -2.644348000 | -2.249399000 |
| H  | -3.605086000 | -3.764616000 | -0.892468000 |
| C  | -0.138703000 | 0.692669000  | -2.971844000 |
| C  | -2.477425000 | 0.665471000  | -3.013302000 |
| C  | -0.108015000 | 1.246489000  | -4.263171000 |
| C  | -2.505476000 | 1.210604000  | -4.285589000 |
| H  | -3.391266000 | 0.418817000  | -2.475747000 |
| C  | -1.293810000 | 1.512118000  | -4.937009000 |
| H  | 0.847521000  | 1.469009000  | -4.737503000 |
| H  | -3.466657000 | 1.398655000  | -4.765421000 |
| H  | -1.282393000 | 1.940920000  | -5.939154000 |
| C  | 1.018828000  | 0.367833000  | -2.160821000 |
| C  | 1.701263000  | -0.510130000 | -0.098807000 |
| C  | 2.361495000  | 0.553619000  | -2.529114000 |
| C  | 3.039789000  | -0.347682000 | -0.414482000 |
| H  | 1.393767000  | -0.932479000 | 0.856773000  |
| C  | 3.389406000  | 0.200216000  | -1.662285000 |
| H  | 2.597155000  | 0.978941000  | -3.503857000 |
| H  | 3.799672000  | -0.646861000 | 0.307866000  |

|   |              |              |              |
|---|--------------|--------------|--------------|
| H | 4.432336000  | 0.343031000  | -1.944716000 |
| N | 0.674844000  | -0.167287000 | -0.929803000 |
| N | -1.328287000 | 0.394751000  | -2.332661000 |
| C | -0.749992000 | 3.128333000  | 0.020518000  |
| C | -1.564114000 | 4.423181000  | 0.196549000  |
| C | 0.725777000  | 3.377824000  | 0.377013000  |
| H | -0.780719000 | 2.885861000  | -1.054775000 |
| C | -0.968376000 | 5.563080000  | -0.639642000 |
| H | -1.584961000 | 4.728424000  | 1.252593000  |
| H | -2.609612000 | 4.273380000  | -0.104029000 |
| C | 1.319097000  | 4.523045000  | -0.451762000 |
| H | 0.814043000  | 3.635302000  | 1.444240000  |
| H | 1.321047000  | 2.469198000  | 0.222394000  |
| C | 0.503937000  | 5.808074000  | -0.311051000 |
| H | -1.554850000 | 6.482001000  | -0.478686000 |
| H | -1.067927000 | 5.315428000  | -1.710317000 |
| H | 2.363792000  | 4.695500000  | -0.146731000 |
| H | 1.350913000  | 4.223278000  | -1.512518000 |
| H | 0.915013000  | 6.596336000  | -0.961603000 |
| H | 0.589001000  | 6.183382000  | 0.723380000  |
| C | -0.892750000 | 1.525835000  | 2.580455000  |
| C | -1.326293000 | 2.714738000  | 3.453486000  |
| C | -1.290850000 | 0.203933000  | 3.254066000  |
| H | 0.209324000  | 1.542065000  | 2.513996000  |
| C | -0.770632000 | 2.601382000  | 4.879401000  |
| H | -2.425419000 | 2.756532000  | 3.505615000  |
| H | -0.995354000 | 3.665222000  | 3.017759000  |
| C | -0.739387000 | 0.093826000  | 4.678210000  |
| H | -2.387862000 | 0.112515000  | 3.273449000  |
| H | -0.927905000 | -0.634495000 | 2.647179000  |
| C | -1.159891000 | 1.281343000  | 5.543168000  |
| H | -1.126749000 | 3.453816000  | 5.480168000  |
| H | 0.329616000  | 2.683240000  | 4.847854000  |
| H | -1.077569000 | -0.851080000 | 5.132560000  |
| H | 0.362875000  | 0.044317000  | 4.640055000  |
| H | -0.707537000 | 1.208572000  | 6.544944000  |
| H | -2.252862000 | 1.255467000  | 5.691276000  |
| C | -0.659096000 | -3.170249000 | -2.652813000 |
| C | 0.831194000  | -3.543343000 | -2.564112000 |
| C | -1.423326000 | -4.221099000 | -3.478877000 |
| H | -0.714977000 | -2.226948000 | -3.221496000 |
| C | 1.449253000  | -3.711354000 | -3.957434000 |
| H | 0.948667000  | -4.487367000 | -2.009655000 |
| H | 1.388713000  | -2.779998000 | -2.007515000 |
| C | -0.802802000 | -4.376074000 | -4.873212000 |
| H | -1.411824000 | -5.196908000 | -2.973302000 |
| H | -2.479472000 | -3.941006000 | -3.589222000 |
| C | 0.683095000  | -4.728104000 | -4.802981000 |
| H | 2.504926000  | -4.011601000 | -3.859235000 |
| H | 1.450186000  | -2.735381000 | -4.470702000 |
| H | -1.353003000 | -5.146215000 | -5.437531000 |

|                                                    |              |              |              |
|----------------------------------------------------|--------------|--------------|--------------|
| H                                                  | -0.928668000 | -3.432766000 | -5.431581000 |
| H                                                  | 1.111289000  | -4.783276000 | -5.816529000 |
| H                                                  | 0.799844000  | -5.733048000 | -4.361864000 |
| C                                                  | -0.900130000 | -3.927999000 | 0.278902000  |
| C                                                  | -1.497500000 | -3.578316000 | 1.651346000  |
| C                                                  | -1.198443000 | -5.397357000 | -0.058835000 |
| H                                                  | 0.196309000  | -3.814905000 | 0.355292000  |
| C                                                  | -0.996935000 | -4.519540000 | 2.750689000  |
| H                                                  | -2.595886000 | -3.628869000 | 1.599936000  |
| H                                                  | -1.259397000 | -2.539048000 | 1.904493000  |
| C                                                  | -0.707922000 | -6.345076000 | 1.044616000  |
| H                                                  | -2.283228000 | -5.534970000 | -0.190406000 |
| H                                                  | -0.727365000 | -5.686990000 | -1.005439000 |
| C                                                  | -1.281246000 | -5.982495000 | 2.413376000  |
| H                                                  | -1.467675000 | -4.248904000 | 3.709289000  |
| H                                                  | 0.089778000  | -4.380645000 | 2.887255000  |
| H                                                  | -0.970452000 | -7.382006000 | 0.779430000  |
| H                                                  | 0.394276000  | -6.307344000 | 1.089519000  |
| H                                                  | -0.868396000 | -6.646208000 | 3.189581000  |
| H                                                  | -2.371921000 | -6.148452000 | 2.407672000  |
| Sum of electronic and thermal Energies=            |              |              | -3668.466607 |
| Sum of electronic and thermal Enthalpies=          |              |              | -3668.465662 |
| Sum of electronic and thermal Free Energies=       |              |              | -3668.592733 |
| Lowest vibration frequencies (/cm <sup>-1</sup> ): | 7.5712       | 18.2658      | 21.7444      |

**<sup>4</sup>g**

|    |              |              |              |
|----|--------------|--------------|--------------|
| Fe | -0.864018000 | -0.046212000 | 0.024178000  |
| C  | -2.458300000 | -0.046464000 | 1.459490000  |
| C  | -2.450944000 | 1.196489000  | 0.766995000  |
| C  | -2.482033000 | -1.267437000 | 0.728290000  |
| C  | -2.462429000 | 1.218360000  | -0.653531000 |
| H  | -2.379936000 | 2.129275000  | 1.321131000  |
| C  | -2.491071000 | -1.245709000 | -0.692215000 |
| H  | -2.433633000 | -2.218408000 | 1.252758000  |
| C  | -2.478495000 | -0.002434000 | -1.384780000 |
| H  | -2.401080000 | 2.168447000  | -1.178365000 |
| H  | -2.447630000 | -2.180020000 | -1.246985000 |
| H  | -2.466590000 | 0.012905000  | -2.472864000 |
| H  | -2.434670000 | -0.063114000 | 2.547398000  |
| C  | 1.196111000  | -0.060933000 | 0.000015000  |
| C  | 1.907483000  | 1.179084000  | -0.049055000 |
| C  | 1.930169000  | -1.295832000 | 0.024206000  |
| C  | 3.326714000  | 1.186321000  | -0.117508000 |
| C  | 3.353221000  | -1.292829000 | 0.027243000  |
| C  | 3.981936000  | -0.043788000 | -0.075132000 |
| H  | 5.072652000  | -0.039338000 | -0.120429000 |
| C  | 1.131595000  | -2.581782000 | -0.008439000 |
| C  | 0.721577000  | -3.236475000 | 1.190300000  |
| C  | 0.776104000  | -3.164603000 | -1.261223000 |
| C  | -0.089480000 | -4.379025000 | 1.107882000  |
| C  | -0.041228000 | -4.305399000 | -1.276073000 |



|   |              |              |              |
|---|--------------|--------------|--------------|
| C | -0.500956000 | -4.928831000 | -0.111448000 |
| H | -0.394242000 | -4.866851000 | 2.034560000  |
| H | -0.318139000 | -4.742291000 | -2.237419000 |
| C | 1.138190000  | 2.485645000  | -0.013062000 |
| C | 0.823463000  | 3.098786000  | 1.237503000  |
| C | 0.732442000  | 3.149183000  | -1.207863000 |
| C | 0.040868000  | 4.263050000  | 1.261441000  |
| C | -0.047640000 | 4.313465000  | -1.117854000 |
| C | -0.427258000 | 4.885810000  | 0.098978000  |
| H | -0.194766000 | 4.709431000  | 2.228349000  |
| H | -0.358365000 | 4.807659000  | -2.040630000 |
| C | 4.193171000  | 2.439717000  | -0.230800000 |
| H | 3.520976000  | 3.308595000  | -0.256979000 |
| C | 5.028202000  | 2.448188000  | -1.523202000 |
| H | 5.804511000  | 1.670245000  | -1.503143000 |
| H | 4.412924000  | 2.275022000  | -2.413243000 |
| H | 5.539424000  | 3.415053000  | -1.643812000 |
| C | 5.130964000  | 2.616159000  | 0.975901000  |
| H | 5.906642000  | 1.837665000  | 0.997709000  |
| H | 5.644938000  | 3.587714000  | 0.922795000  |
| H | 4.590969000  | 2.569361000  | 1.927610000  |
| C | 4.369863000  | -2.446423000 | 0.152910000  |
| H | 5.164912000  | -2.178143000 | -0.565363000 |
| C | 5.041454000  | -2.422159000 | 1.540450000  |
| H | 5.869240000  | -3.146480000 | 1.575173000  |
| H | 5.451849000  | -1.432031000 | 1.777723000  |
| H | 4.334462000  | -2.685237000 | 2.335339000  |
| C | 3.970321000  | -3.875129000 | -0.213057000 |
| H | 3.226382000  | -4.305687000 | 0.463330000  |
| H | 3.571171000  | -3.934029000 | -1.228305000 |
| H | 4.866014000  | -4.513414000 | -0.173475000 |
| C | 1.289265000  | -2.629434000 | -2.601109000 |
| H | 2.117119000  | -1.943372000 | -2.376482000 |
| C | 1.183275000  | -2.789935000 | 2.579431000  |
| H | 1.924134000  | -1.992929000 | 2.432538000  |
| C | 1.838537000  | -3.725508000 | -3.531331000 |
| H | 2.373012000  | -3.261854000 | -4.373521000 |
| H | 2.536171000  | -4.403006000 | -3.024346000 |
| H | 1.036423000  | -4.340706000 | -3.962929000 |
| C | 0.230954000  | -1.817785000 | -3.357484000 |
| H | -0.108509000 | -0.968692000 | -2.757780000 |
| H | 0.645014000  | -1.428141000 | -4.299554000 |
| H | -0.643396000 | -2.436541000 | -3.607928000 |
| C | 1.863218000  | -3.925477000 | 3.364520000  |
| H | 2.330911000  | -3.524709000 | 4.276029000  |
| H | 1.140871000  | -4.689559000 | 3.684045000  |
| H | 2.640844000  | -4.430989000 | 2.780196000  |
| C | 0.054863000  | -2.196974000 | 3.432850000  |
| H | -0.386125000 | -1.322561000 | 2.946974000  |
| H | -0.744266000 | -2.930461000 | 3.614910000  |
| H | 0.442702000  | -1.880958000 | 4.412784000  |

|                                                     |              |              |              |
|-----------------------------------------------------|--------------|--------------|--------------|
| C                                                   | -1.358917000 | -6.184118000 | -0.189621000 |
| H                                                   | -1.580255000 | -6.349683000 | -1.257226000 |
| C                                                   | -0.597780000 | -7.423762000 | 0.306228000  |
| H                                                   | -1.204652000 | -8.331752000 | 0.173204000  |
| H                                                   | 0.341599000  | -7.557830000 | -0.247609000 |
| H                                                   | -0.347002000 | -7.343256000 | 1.373505000  |
| C                                                   | -2.708139000 | -6.032951000 | 0.527326000  |
| H                                                   | -2.581968000 | -5.889983000 | 1.609890000  |
| H                                                   | -3.272665000 | -5.173973000 | 0.138465000  |
| H                                                   | -3.323919000 | -6.933094000 | 0.384203000  |
| C                                                   | 1.172748000  | 2.711891000  | -2.604897000 |
| H                                                   | 1.804426000  | 1.821396000  | -2.486934000 |
| C                                                   | 1.364498000  | 2.586984000  | 2.573104000  |
| H                                                   | 2.037215000  | 1.747925000  | 2.352099000  |
| C                                                   | 2.184797000  | 3.666134000  | 3.302149000  |
| H                                                   | 2.719992000  | 3.223950000  | 4.155653000  |
| H                                                   | 2.923578000  | 4.137179000  | 2.642813000  |
| H                                                   | 1.543452000  | 4.464764000  | 3.701913000  |
| C                                                   | 0.271576000  | 2.053968000  | 3.508167000  |
| H                                                   | -0.273883000 | 1.227222000  | 3.043823000  |
| H                                                   | 0.715760000  | 1.684101000  | 4.444286000  |
| H                                                   | -0.452735000 | 2.837619000  | 3.774013000  |
| C                                                   | 2.015720000  | 3.805901000  | -3.286074000 |
| H                                                   | 2.459585000  | 3.422168000  | -4.216730000 |
| H                                                   | 1.402039000  | 4.677876000  | -3.553387000 |
| H                                                   | 2.828401000  | 4.161801000  | -2.642960000 |
| C                                                   | 0.009098000  | 2.328566000  | -3.529572000 |
| H                                                   | -0.582741000 | 1.509551000  | -3.111539000 |
| H                                                   | -0.664269000 | 3.178767000  | -3.711118000 |
| H                                                   | 0.393474000  | 2.001786000  | -4.507072000 |
| C                                                   | -1.260413000 | 6.159063000  | 0.134258000  |
| H                                                   | -1.519823000 | 6.396125000  | -0.911071000 |
| C                                                   | -0.458017000 | 7.351633000  | 0.677440000  |
| H                                                   | 0.464106000  | 7.503011000  | 0.099564000  |
| H                                                   | -1.050994000 | 8.276623000  | 0.622095000  |
| H                                                   | -0.172137000 | 7.201071000  | 1.728010000  |
| C                                                   | -2.583796000 | 5.982078000  | 0.892831000  |
| H                                                   | -3.176095000 | 5.157046000  | 0.472868000  |
| H                                                   | -2.417944000 | 5.768299000  | 1.958259000  |
| H                                                   | -3.190321000 | 6.897667000  | 0.831257000  |
| Sum of electronic and thermal Energies=             |              |              | -3131.578513 |
| Sum of electronic and thermal Enthalpies=           |              |              | -3131.577569 |
| Sum of electronic and thermal Free Energies=        |              |              | -3131.725001 |
| Lowest vibration frequencies (/cm <sup>-1</sup> ) : | 21.8414      | 23.9772      | 25.9094      |

<sup>28</sup>

|    |              |              |              |
|----|--------------|--------------|--------------|
| Fe | -0.487969000 | -0.660782000 | -0.007108000 |
| C  | -1.918055000 | 0.514415000  | 0.841485000  |
| C  | -1.940822000 | 0.661560000  | -0.574936000 |
| C  | -2.004208000 | -0.771804000 | 1.429431000  |
| C  | -2.068917000 | -0.479045000 | -1.404251000 |

|   |              |              |              |
|---|--------------|--------------|--------------|
| H | -1.836397000 | 1.650278000  | -1.010453000 |
| C | -2.091747000 | -1.911088000 | 0.592294000  |
| H | -1.952252000 | -0.890264000 | 2.509948000  |
| C | -2.130078000 | -1.764817000 | -0.814644000 |
| H | -2.096551000 | -0.367206000 | -2.487032000 |
| H | -2.053283000 | -2.907045000 | 1.027166000  |
| H | -2.131095000 | -2.653190000 | -1.444368000 |
| H | -1.787078000 | 1.397272000  | 1.456758000  |
| C | 1.102968000  | 0.520538000  | 0.083185000  |
| C | 1.480334000  | 1.901813000  | 0.111309000  |
| C | 2.103244000  | -0.484346000 | 0.139609000  |
| C | 2.864970000  | 2.215969000  | 0.214573000  |
| C | 3.489885000  | -0.190041000 | 0.178081000  |
| C | 3.799391000  | 1.175612000  | 0.239602000  |
| H | 4.855443000  | 1.444309000  | 0.302993000  |
| C | 1.430998000  | -1.839710000 | 0.216463000  |
| C | 1.264293000  | -2.492390000 | 1.499757000  |
| C | 1.051727000  | -2.556410000 | -0.974054000 |
| C | 0.706872000  | -3.771609000 | 1.545442000  |
| C | 0.480965000  | -3.843595000 | -0.836008000 |
| C | 0.304337000  | -4.472856000 | 0.392301000  |
| H | 0.609780000  | -4.259677000 | 2.514013000  |
| H | 0.216308000  | -4.392835000 | -1.741327000 |
| C | 0.458795000  | 3.013815000  | -0.000587000 |
| C | -0.140649000 | 3.613040000  | 1.148609000  |
| C | 0.066544000  | 3.489257000  | -1.286106000 |
| C | -1.199027000 | 4.519249000  | 0.978969000  |
| C | -0.995339000 | 4.402032000  | -1.390176000 |
| C | -1.674060000 | 4.907402000  | -0.278183000 |
| H | -1.657575000 | 4.951049000  | 1.869114000  |
| H | -1.304815000 | 4.738036000  | -2.381884000 |
| C | 3.420047000  | 3.639107000  | 0.289588000  |
| H | 2.564885000  | 4.328718000  | 0.269539000  |
| C | 4.317044000  | 3.986049000  | -0.910753000 |
| H | 5.249707000  | 3.404369000  | -0.898569000 |
| H | 3.818971000  | 3.790574000  | -1.866273000 |
| H | 4.596003000  | 5.050202000  | -0.884214000 |
| C | 4.199705000  | 3.889108000  | 1.591977000  |
| H | 5.134582000  | 3.311616000  | 1.617617000  |
| H | 4.471654000  | 4.951754000  | 1.678187000  |
| H | 3.619063000  | 3.614352000  | 2.479773000  |
| C | 4.728869000  | -1.097495000 | 0.105565000  |
| H | 5.453701000  | -0.631033000 | 0.795977000  |
| C | 4.619188000  | -2.553176000 | 0.558454000  |
| H | 5.596696000  | -3.043639000 | 0.439116000  |
| H | 4.350934000  | -2.624020000 | 1.616407000  |
| H | 3.887449000  | -3.131321000 | -0.013154000 |
| C | 5.373360000  | -1.004118000 | -1.291483000 |
| H | 4.729976000  | -1.436942000 | -2.065449000 |
| H | 5.570762000  | 0.038675000  | -1.572006000 |
| H | 6.331626000  | -1.545160000 | -1.307256000 |

|   |              |              |              |
|---|--------------|--------------|--------------|
| C | 1.541867000  | -2.161243000 | -2.374286000 |
| H | 2.039657000  | -1.186998000 | -2.277654000 |
| C | 1.822567000  | -1.882728000 | 2.790801000  |
| H | 2.626038000  | -1.199515000 | 2.484523000  |
| C | 2.580082000  | -3.180655000 | -2.887024000 |
| H | 3.061638000  | -2.796306000 | -3.798268000 |
| H | 3.364978000  | -3.392906000 | -2.154454000 |
| H | 2.105648000  | -4.137019000 | -3.148968000 |
| C | 0.451750000  | -2.017836000 | -3.440548000 |
| H | -0.250885000 | -1.223193000 | -3.184333000 |
| H | 0.909382000  | -1.767752000 | -4.408958000 |
| H | -0.114578000 | -2.949772000 | -3.580581000 |
| C | 2.441038000  | -2.920712000 | 3.742585000  |
| H | 3.038616000  | -2.405229000 | 4.508335000  |
| H | 1.674600000  | -3.499817000 | 4.277894000  |
| H | 3.096759000  | -3.632930000 | 3.225547000  |
| C | 0.813632000  | -1.030681000 | 3.568799000  |
| H | 0.425461000  | -0.222139000 | 2.944207000  |
| H | -0.030675000 | -1.638108000 | 3.925042000  |
| H | 1.299251000  | -0.584925000 | 4.449974000  |
| C | -0.205805000 | -5.906713000 | 0.457636000  |
| H | -0.525972000 | -6.174004000 | -0.563084000 |
| C | 0.923924000  | -6.877159000 | 0.841003000  |
| H | 0.570623000  | -7.918063000 | 0.799428000  |
| H | 1.778219000  | -6.779569000 | 0.157179000  |
| H | 1.288658000  | -6.688423000 | 1.860580000  |
| C | -1.426139000 | -6.088978000 | 1.370486000  |
| H | -1.194243000 | -5.856942000 | 2.419305000  |
| H | -2.260907000 | -5.446939000 | 1.058669000  |
| H | -1.775846000 | -7.131034000 | 1.335488000  |
| C | 0.787380000  | 3.095692000  | -2.576132000 |
| H | 1.661113000  | 2.496109000  | -2.290038000 |
| C | 0.388097000  | 3.419593000  | 2.573616000  |
| H | 1.218071000  | 2.702366000  | 2.522760000  |
| C | 0.943410000  | 4.751744000  | 3.114769000  |
| H | 1.481735000  | 4.587325000  | 4.060086000  |
| H | 1.631764000  | 5.230006000  | 2.409138000  |
| H | 0.133567000  | 5.466366000  | 3.319855000  |
| C | -0.629451000 | 2.871344000  | 3.585804000  |
| H | -0.967350000 | 1.861402000  | 3.334924000  |
| H | -0.170930000 | 2.821300000  | 4.584520000  |
| H | -1.516417000 | 3.515286000  | 3.668535000  |
| C | 1.299060000  | 4.332657000  | -3.335419000 |
| H | 1.974630000  | 4.026447000  | -4.148013000 |
| H | 0.476940000  | 4.898772000  | -3.795683000 |
| H | 1.845589000  | 5.020966000  | -2.678876000 |
| C | -0.063299000 | 2.227594000  | -3.511311000 |
| H | -0.344132000 | 1.291102000  | -3.021757000 |
| H | -0.981489000 | 2.745569000  | -3.824669000 |
| H | 0.502743000  | 1.977167000  | -4.421110000 |
| C | -2.839597000 | 5.871361000  | -0.445769000 |

|                                                     |              |             |                                                                   |
|-----------------------------------------------------|--------------|-------------|-------------------------------------------------------------------|
| H                                                   | -3.006139000 | 5.979945000 | -1.530492000                                                      |
| C                                                   | -2.517090000 | 7.271398000 | 0.098816000                                                       |
| H                                                   | -1.604741000 | 7.674558000 | -0.362129000                                                      |
| H                                                   | -3.341538000 | 7.968962000 | -0.111033000                                                      |
| H                                                   | -2.363071000 | 7.257637000 | 1.187098000                                                       |
| C                                                   | -4.140394000 | 5.318645000 | 0.154518000                                                       |
| H                                                   | -4.386474000 | 4.335895000 | -0.271028000                                                      |
| H                                                   | -4.066297000 | 5.200818000 | 1.244889000                                                       |
| H                                                   | -4.981279000 | 5.997992000 | -0.049355000                                                      |
| Sum of electronic and thermal Energies=             |              |             | -3131.568622                                                      |
| Sum of electronic and thermal Enthalpies=           |              |             | -3131.567678                                                      |
| Sum of electronic and thermal Free Energies=        |              |             | -3131.711462                                                      |
| Lowest vibration frequencies (/cm <sup>-1</sup> ) : |              |             | 23.9305                      25.7689                      27.5651 |

49

|    |              |              |              |
|----|--------------|--------------|--------------|
| Fe | -0.046975000 | -0.976054000 | -0.259292000 |
| C  | -1.348181000 | -3.542539000 | 0.124108000  |
| C  | 1.211131000  | -3.588490000 | -0.142648000 |
| C  | -0.059890000 | -4.108000000 | 0.168993000  |
| H  | -0.062891000 | -5.187410000 | 0.322903000  |
| N  | -1.595782000 | -2.222262000 | -0.027802000 |
| N  | 1.467825000  | -2.277359000 | -0.341547000 |
| C  | 2.766759000  | -1.898359000 | -0.814814000 |
| C  | 2.994045000  | -1.763550000 | -2.216522000 |
| C  | 3.832811000  | -1.650052000 | 0.100173000  |
| C  | 4.254389000  | -1.336513000 | -2.661216000 |
| C  | 5.071771000  | -1.231416000 | -0.407054000 |
| C  | 5.288944000  | -1.061460000 | -1.771853000 |
| H  | 4.435343000  | -1.234198000 | -3.732216000 |
| H  | 5.890984000  | -1.039952000 | 0.287118000  |
| H  | 6.262106000  | -0.731686000 | -2.139795000 |
| C  | -2.958795000 | -1.816319000 | -0.190941000 |
| C  | -3.779648000 | -1.556258000 | 0.948206000  |
| C  | -3.501993000 | -1.675653000 | -1.501965000 |
| C  | -5.119033000 | -1.191332000 | 0.741631000  |
| C  | -4.845689000 | -1.295699000 | -1.642511000 |
| C  | -5.658672000 | -1.062606000 | -0.536266000 |
| H  | -5.757408000 | -1.006718000 | 1.606402000  |
| H  | -5.268942000 | -1.195372000 | -2.643022000 |
| H  | -6.705791000 | -0.784184000 | -0.668382000 |
| C  | 1.944461000  | -2.132670000 | -3.261782000 |
| H  | 1.015076000  | -2.367830000 | -2.725696000 |
| C  | 3.704716000  | -1.862087000 | 1.606172000  |
| H  | 2.658384000  | -2.126872000 | 1.809098000  |
| C  | -3.270975000 | -1.666173000 | 2.382993000  |
| H  | -2.189557000 | -1.848131000 | 2.330200000  |
| C  | -2.686042000 | -1.943282000 | -2.761729000 |
| H  | -1.667495000 | -2.198801000 | -2.439256000 |
| P  | 0.065607000  | 1.197540000  | 0.465064000  |
| C  | 1.611861000  | 2.114853000  | -0.004888000 |
| C  | 2.454736000  | 2.752295000  | 0.920580000  |

|   |              |              |              |
|---|--------------|--------------|--------------|
| C | 1.942596000  | 2.186343000  | -1.370568000 |
| C | 3.596935000  | 3.436625000  | 0.490545000  |
| H | 2.219794000  | 2.723458000  | 1.983157000  |
| C | 3.078125000  | 2.875312000  | -1.799356000 |
| H | 1.295356000  | 1.712629000  | -2.108283000 |
| C | 3.912817000  | 3.502353000  | -0.868572000 |
| H | 4.239456000  | 3.923136000  | 1.226816000  |
| H | 3.313035000  | 2.917701000  | -2.864165000 |
| H | 4.803754000  | 4.037156000  | -1.201666000 |
| C | -1.218763000 | 2.408289000  | -0.141630000 |
| C | -0.917555000 | 3.747697000  | -0.453898000 |
| C | -2.545723000 | 1.969788000  | -0.293149000 |
| C | -1.915642000 | 4.617679000  | -0.903557000 |
| H | 0.100350000  | 4.119299000  | -0.348824000 |
| C | -3.542715000 | 2.842315000  | -0.739558000 |
| H | -2.806802000 | 0.939140000  | -0.064221000 |
| C | -3.231458000 | 4.169436000  | -1.048651000 |
| H | -1.659041000 | 5.651948000  | -1.140997000 |
| H | -4.563436000 | 2.473977000  | -0.850384000 |
| H | -4.008124000 | 4.849132000  | -1.403619000 |
| C | -0.009760000 | 1.443002000  | 2.306046000  |
| C | -0.455606000 | 2.632547000  | 2.910388000  |
| C | 0.399475000  | 0.382743000  | 3.132327000  |
| C | -0.475503000 | 2.758613000  | 4.302652000  |
| H | -0.793698000 | 3.464342000  | 2.294105000  |
| C | 0.387212000  | 0.512236000  | 4.523954000  |
| H | 0.729623000  | -0.551708000 | 2.678168000  |
| C | -0.050160000 | 1.702095000  | 5.113954000  |
| H | -0.827141000 | 3.688287000  | 4.753992000  |
| H | 0.713457000  | -0.322209000 | 5.147313000  |
| H | -0.066653000 | 1.803141000  | 6.200495000  |
| C | 2.286702000  | -4.649112000 | -0.295364000 |
| H | 3.259782000  | -4.236383000 | -0.572516000 |
| H | 2.402719000  | -5.208961000 | 0.643576000  |
| H | 1.995093000  | -5.378801000 | -1.063759000 |
| C | -2.467319000 | -4.568204000 | 0.178926000  |
| H | -3.462743000 | -4.123476000 | 0.250528000  |
| H | -2.446762000 | -5.198334000 | -0.722278000 |
| H | -2.324248000 | -5.240139000 | 1.036399000  |
| C | -2.588610000 | -0.702358000 | -3.662268000 |
| H | -3.572386000 | -0.398466000 | -4.046923000 |
| H | -2.165944000 | 0.155729000  | -3.123637000 |
| H | -1.947828000 | -0.908735000 | -4.531512000 |
| C | -3.219470000 | -3.147426000 | -3.554686000 |
| H | -4.224458000 | -2.956462000 | -3.957793000 |
| H | -2.558349000 | -3.367570000 | -4.406204000 |
| H | -3.277056000 | -4.048081000 | -2.930687000 |
| C | 1.634332000  | -0.988393000 | -4.237001000 |
| H | 1.285280000  | -0.091904000 | -3.710452000 |
| H | 2.512639000  | -0.703414000 | -4.832820000 |
| H | 0.847414000  | -1.291433000 | -4.942619000 |

|                                                     |              |              |                                              |
|-----------------------------------------------------|--------------|--------------|----------------------------------------------|
| C                                                   | 2.347683000  | -3.396594000 | -4.040237000                                 |
| H                                                   | 3.253651000  | -3.227558000 | -4.639750000                                 |
| H                                                   | 2.547757000  | -4.239302000 | -3.367717000                                 |
| H                                                   | 1.543446000  | -3.696173000 | -4.728995000                                 |
| C                                                   | 4.031557000  | -0.593843000 | 2.408232000                                  |
| H                                                   | 3.835683000  | -0.758061000 | 3.478094000                                  |
| H                                                   | 5.090177000  | -0.314080000 | 2.311051000                                  |
| H                                                   | 3.431674000  | 0.258764000  | 2.077265000                                  |
| C                                                   | 4.585089000  | -3.020847000 | 2.106597000                                  |
| H                                                   | 5.653516000  | -2.791994000 | 1.983805000                                  |
| H                                                   | 4.407725000  | -3.196379000 | 3.178385000                                  |
| H                                                   | 4.384860000  | -3.958088000 | 1.575397000                                  |
| C                                                   | -3.906418000 | -2.839284000 | 3.148449000                                  |
| H                                                   | -3.732477000 | -3.802401000 | 2.655736000                                  |
| H                                                   | -3.484002000 | -2.900624000 | 4.162518000                                  |
| H                                                   | -4.993478000 | -2.708894000 | 3.252119000                                  |
| C                                                   | -3.484899000 | -0.364991000 | 3.171913000                                  |
| H                                                   | -3.007574000 | -0.438890000 | 4.158890000                                  |
| H                                                   | -3.052751000 | 0.499867000  | 2.657752000                                  |
| H                                                   | -4.551696000 | -0.159717000 | 3.339888000                                  |
| Sum of electronic and thermal Energies=             |              |              | -3537.757852                                 |
| Sum of electronic and thermal Enthalpies=           |              |              | -3537.756908                                 |
| Sum of electronic and thermal Free Energies=        |              |              | -3537.904802                                 |
| Lowest vibration frequencies (/cm <sup>-1</sup> ) : |              |              | 9.7925            14.5316            19.3022 |

29

|    |              |              |              |
|----|--------------|--------------|--------------|
| Fe | -0.016133000 | -1.031232000 | -0.214824000 |
| C  | -1.356009000 | -3.594871000 | -0.009950000 |
| C  | 1.182950000  | -3.668977000 | -0.180742000 |
| C  | -0.093730000 | -4.208742000 | 0.040602000  |
| H  | -0.118771000 | -5.294113000 | 0.135415000  |
| N  | -1.527140000 | -2.257007000 | -0.080365000 |
| N  | 1.412942000  | -2.345370000 | -0.330801000 |
| C  | 2.699480000  | -1.936365000 | -0.812425000 |
| C  | 2.927518000  | -1.859886000 | -2.220537000 |
| C  | 3.761359000  | -1.640704000 | 0.093962000  |
| C  | 4.190470000  | -1.458371000 | -2.679996000 |
| C  | 5.003014000  | -1.251167000 | -0.429339000 |
| C  | 5.225604000  | -1.151385000 | -1.800324000 |
| H  | 4.374267000  | -1.404119000 | -3.754142000 |
| H  | 5.821312000  | -1.029973000 | 0.256914000  |
| H  | 6.202741000  | -0.848197000 | -2.180555000 |
| C  | -2.866460000 | -1.758457000 | -0.156539000 |
| C  | -3.647235000 | -1.606000000 | 1.031356000  |
| C  | -3.435122000 | -1.445358000 | -1.425790000 |
| C  | -4.972739000 | -1.162195000 | 0.907504000  |
| C  | -4.763580000 | -0.998732000 | -1.480947000 |
| C  | -5.536602000 | -0.861277000 | -0.330948000 |
| H  | -5.583176000 | -1.058901000 | 1.805586000  |
| H  | -5.207394000 | -0.767682000 | -2.450137000 |
| H  | -6.573232000 | -0.525978000 | -0.398212000 |

|   |              |              |              |
|---|--------------|--------------|--------------|
| C | 1.873402000  | -2.256333000 | -3.251307000 |
| H | 0.948856000  | -2.484252000 | -2.705095000 |
| C | 3.625409000  | -1.777925000 | 1.607347000  |
| H | 2.572479000  | -2.011978000 | 1.815850000  |
| C | -3.118536000 | -1.925031000 | 2.428243000  |
| H | -2.046515000 | -2.143134000 | 2.330410000  |
| C | -2.669098000 | -1.614154000 | -2.732650000 |
| H | -1.652168000 | -1.936900000 | -2.470872000 |
| P | 0.100271000  | 1.152102000  | 0.463348000  |
| C | 1.662935000  | 2.084076000  | 0.073887000  |
| C | 2.262434000  | 2.993996000  | 0.963072000  |
| C | 2.251424000  | 1.898586000  | -1.189280000 |
| C | 3.410549000  | 3.700688000  | 0.592204000  |
| H | 1.837045000  | 3.154184000  | 1.951896000  |
| C | 3.389634000  | 2.616237000  | -1.564413000 |
| H | 1.817797000  | 1.180666000  | -1.882960000 |
| C | 3.974752000  | 3.520808000  | -0.673683000 |
| H | 3.862653000  | 4.398402000  | 1.299678000  |
| H | 3.827300000  | 2.452873000  | -2.550181000 |
| H | 4.869707000  | 4.075188000  | -0.961206000 |
| C | -1.174776000 | 2.314167000  | -0.243908000 |
| C | -0.841219000 | 3.430408000  | -1.032260000 |
| C | -2.535765000 | 2.056555000  | 0.005773000  |
| C | -1.838941000 | 4.263231000  | -1.549719000 |
| H | 0.201365000  | 3.662684000  | -1.240065000 |
| C | -3.528935000 | 2.896812000  | -0.502394000 |
| H | -2.827012000 | 1.191589000  | 0.596910000  |
| C | -3.185852000 | 4.004289000  | -1.283877000 |
| H | -1.554865000 | 5.123895000  | -2.158286000 |
| H | -4.575651000 | 2.674153000  | -0.291217000 |
| H | -3.962430000 | 4.657856000  | -1.684926000 |
| C | -0.080505000 | 1.471071000  | 2.285849000  |
| C | -0.633571000 | 2.651171000  | 2.816502000  |
| C | 0.389418000  | 0.490134000  | 3.175565000  |
| C | -0.701205000 | 2.844494000  | 4.200038000  |
| H | -1.011469000 | 3.424237000  | 2.148361000  |
| C | 0.334548000  | 0.690493000  | 4.557448000  |
| H | 0.798703000  | -0.438188000 | 2.777416000  |
| C | -0.211436000 | 1.869341000  | 5.074412000  |
| H | -1.135930000 | 3.764971000  | 4.594325000  |
| H | 0.711164000  | -0.081164000 | 5.231243000  |
| H | -0.262239000 | 2.024514000  | 6.153452000  |
| C | 2.292799000  | -4.698672000 | -0.279178000 |
| H | 3.248294000  | -4.272678000 | -0.595018000 |
| H | 2.440341000  | -5.186497000 | 0.695442000  |
| H | 2.019865000  | -5.490577000 | -0.989949000 |
| C | -2.521413000 | -4.563434000 | -0.088726000 |
| H | -3.496767000 | -4.087217000 | 0.036795000  |
| H | -2.520655000 | -5.064200000 | -1.068428000 |
| H | -2.416642000 | -5.351848000 | 0.668628000  |
| C | -2.548158000 | -0.295855000 | -3.512196000 |



|                                                     |              |              |                                               |
|-----------------------------------------------------|--------------|--------------|-----------------------------------------------|
| H                                                   | -3.529525000 | 0.084460000  | -3.828609000                                  |
| H                                                   | -2.069391000 | 0.485671000  | -2.910006000                                  |
| H                                                   | -1.947215000 | -0.444777000 | -4.420705000                                  |
| C                                                   | -3.278264000 | -2.712045000 | -3.620035000                                  |
| H                                                   | -4.291680000 | -2.447087000 | -3.954069000                                  |
| H                                                   | -2.662204000 | -2.861161000 | -4.519283000                                  |
| H                                                   | -3.342822000 | -3.671555000 | -3.091945000                                  |
| C                                                   | 1.551808000  | -1.129578000 | -4.244202000                                  |
| H                                                   | 1.183822000  | -0.230787000 | -3.733718000                                  |
| H                                                   | 2.428298000  | -0.841167000 | -4.841240000                                  |
| H                                                   | 0.771767000  | -1.454845000 | -4.947735000                                  |
| C                                                   | 2.276183000  | -3.531349000 | -4.011649000                                  |
| H                                                   | 3.171233000  | -3.368050000 | -4.628926000                                  |
| H                                                   | 2.492034000  | -4.359887000 | -3.326637000                                  |
| H                                                   | 1.463613000  | -3.849357000 | -4.681872000                                  |
| C                                                   | 3.979958000  | -0.480578000 | 2.349601000                                   |
| H                                                   | 3.773026000  | -0.589458000 | 3.424372000                                   |
| H                                                   | 5.046855000  | -0.235896000 | 2.249908000                                   |
| H                                                   | 3.407464000  | 0.373584000  | 1.976057000                                   |
| C                                                   | 4.479097000  | -2.930096000 | 2.165710000                                   |
| H                                                   | 5.552251000  | -2.732926000 | 2.029836000                                   |
| H                                                   | 4.299899000  | -3.046249000 | 3.245230000                                   |
| H                                                   | 4.254729000  | -3.887617000 | 1.683289000                                   |
| C                                                   | -3.794730000 | -3.159952000 | 3.048723000                                   |
| H                                                   | -3.685352000 | -4.054423000 | 2.426719000                                   |
| H                                                   | -3.350070000 | -3.378691000 | 4.031006000                                   |
| H                                                   | -4.870071000 | -2.990400000 | 3.204217000                                   |
| C                                                   | -3.265507000 | -0.736309000 | 3.390835000                                   |
| H                                                   | -2.784844000 | -0.968982000 | 4.351436000                                   |
| H                                                   | -2.796226000 | 0.170996000  | 2.997884000                                   |
| H                                                   | -4.320157000 | -0.509370000 | 3.602291000                                   |
| Sum of electronic and thermal Energies=             |              |              | -3537.719151                                  |
| Sum of electronic and thermal Enthalpies=           |              |              | -3537.718207                                  |
| Sum of electronic and thermal Free Energies=        |              |              | -3537.863451                                  |
| Lowest vibration frequencies (/cm <sup>-1</sup> ) : |              |              | 13.6120            23.1542            26.1070 |

**4g'**

|    |              |              |              |
|----|--------------|--------------|--------------|
| Fe | -0.162123000 | -1.014198000 | -0.674801000 |
| C  | -1.397912000 | -3.540712000 | 0.005816000  |
| C  | 1.103499000  | -3.553290000 | -0.057753000 |
| C  | -0.145592000 | -4.154789000 | 0.112350000  |
| H  | -0.145062000 | -5.216150000 | 0.333962000  |
| N  | -1.624546000 | -2.271787000 | -0.291645000 |
| N  | 1.329052000  | -2.276579000 | -0.336785000 |
| H  | -2.274145000 | -4.174288000 | 0.172037000  |
| H  | 1.977215000  | -4.203185000 | 0.037862000  |
| C  | 2.666046000  | -1.818451000 | -0.420905000 |
| C  | 3.070030000  | -1.176030000 | -1.613875000 |
| C  | 3.555632000  | -1.912921000 | 0.670630000  |
| C  | 4.352658000  | -0.641090000 | -1.699503000 |
| C  | 4.833031000  | -1.354313000 | 0.543489000  |

|   |              |              |              |
|---|--------------|--------------|--------------|
| C | 5.235155000  | -0.723673000 | -0.626039000 |
| H | 4.655914000  | -0.146472000 | -2.614117000 |
| H | 5.513241000  | -1.414852000 | 1.385675000  |
| H | 6.225949000  | -0.294081000 | -0.701517000 |
| C | -2.963287000 | -1.810750000 | -0.327834000 |
| C | -3.609280000 | -1.461658000 | 0.874825000  |
| C | -3.587182000 | -1.604527000 | -1.573150000 |
| C | -4.897080000 | -0.924192000 | 0.808899000  |
| C | -4.875138000 | -1.063792000 | -1.597173000 |
| C | -5.530978000 | -0.728530000 | -0.415494000 |
| H | -5.397810000 | -0.646498000 | 1.728775000  |
| H | -5.362029000 | -0.905004000 | -2.552222000 |
| H | -6.529998000 | -0.312161000 | -0.448591000 |
| C | 2.123557000  | -1.073862000 | -2.777118000 |
| H | 1.618295000  | -2.022077000 | -2.970358000 |
| H | 1.348966000  | -0.314073000 | -2.597620000 |
| H | 2.651568000  | -0.768563000 | -3.681627000 |
| C | 3.175121000  | -2.574276000 | 1.969870000  |
| H | 2.095751000  | -2.607637000 | 2.115653000  |
| H | 3.530457000  | -3.608226000 | 2.014775000  |
| H | 3.619778000  | -2.041000000 | 2.812897000  |
| C | -2.887387000 | -1.611440000 | 2.182105000  |
| H | -2.676649000 | -2.657984000 | 2.415770000  |
| H | -1.920301000 | -1.101324000 | 2.144921000  |
| H | -3.469473000 | -1.189457000 | 3.001739000  |
| C | -2.852018000 | -1.932812000 | -2.840991000 |
| H | -1.963596000 | -1.299498000 | -2.954223000 |
| H | -2.497521000 | -2.965481000 | -2.845482000 |
| H | -3.486342000 | -1.778976000 | -3.714468000 |
| P | 0.005595000  | 1.116391000  | 0.042132000  |
| C | 1.550366000  | 1.951800000  | -0.490343000 |
| C | 2.662273000  | 2.072081000  | 0.350108000  |
| C | 1.658570000  | 2.374243000  | -1.824515000 |
| C | 3.853526000  | 2.612530000  | -0.130695000 |
| H | 2.601621000  | 1.737052000  | 1.376796000  |
| C | 2.847298000  | 2.918834000  | -2.299386000 |
| H | 0.805405000  | 2.285765000  | -2.487723000 |
| C | 3.949346000  | 3.038858000  | -1.452268000 |
| H | 4.708057000  | 2.689599000  | 0.528805000  |
| H | 2.914317000  | 3.246900000  | -3.329063000 |
| H | 4.876546000  | 3.456233000  | -1.823536000 |
| C | -1.295671000 | 2.338879000  | -0.361428000 |
| C | -1.053584000 | 3.716301000  | -0.458946000 |
| C | -2.598440000 | 1.858894000  | -0.550983000 |
| C | -2.098260000 | 4.594139000  | -0.740706000 |
| H | -0.049201000 | 4.097713000  | -0.324382000 |
| C | -3.641790000 | 2.739865000  | -0.825882000 |
| H | -2.795896000 | 0.795987000  | -0.481536000 |
| C | -3.393018000 | 4.107851000  | -0.922922000 |
| H | -1.901266000 | 5.655980000  | -0.817721000 |
| H | -4.640854000 | 2.349119000  | -0.967689000 |

|                                                     |              |              |              |
|-----------------------------------------------------|--------------|--------------|--------------|
| H                                                   | -4.202254000 | 4.792675000  | -1.142643000 |
| C                                                   | 0.091478000  | 1.171709000  | 1.872149000  |
| C                                                   | -0.444875000 | 2.205847000  | 2.647467000  |
| C                                                   | 0.710722000  | 0.088747000  | 2.511648000  |
| C                                                   | -0.355484000 | 2.156524000  | 4.037907000  |
| H                                                   | -0.941804000 | 3.039711000  | 2.169172000  |
| C                                                   | 0.808538000  | 0.047143000  | 3.899416000  |
| H                                                   | 1.103543000  | -0.719151000 | 1.906131000  |
| C                                                   | 0.273006000  | 1.081999000  | 4.665697000  |
| H                                                   | -0.779582000 | 2.957390000  | 4.630207000  |
| H                                                   | 1.291049000  | -0.795205000 | 4.378711000  |
| H                                                   | 0.338569000  | 1.048252000  | 5.745705000  |
| Sum of electronic and thermal Energies=             |              |              | -2003.270931 |
| Sum of electronic and thermal Enthalpies=           |              |              | -2003.269987 |
| Sum of electronic and thermal Free Energies=        |              |              | -2003.384836 |
| Lowest vibration frequencies (/cm <sup>-1</sup> ) : | 16.2081      | 20.7596      | 23.9843      |

29'

|    |              |              |              |
|----|--------------|--------------|--------------|
| Fe | -0.548908000 | -0.990044000 | -0.092479000 |
| C  | -1.930525000 | -3.569732000 | -0.018169000 |
| C  | 0.533916000  | -3.708262000 | -0.060428000 |
| C  | -0.734448000 | -4.287916000 | -0.050183000 |
| H  | -0.791146000 | -5.369997000 | -0.041944000 |
| N  | -2.004571000 | -2.254377000 | -0.030875000 |
| N  | 0.818340000  | -2.414587000 | -0.072737000 |
| H  | -2.869028000 | -4.129217000 | 0.027864000  |
| H  | 1.385549000  | -4.395191000 | -0.051926000 |
| C  | 2.195994000  | -2.076658000 | -0.014883000 |
| C  | 2.867997000  | -1.726471000 | -1.200568000 |
| C  | 2.860366000  | -2.064529000 | 1.225881000  |
| C  | 4.198064000  | -1.311793000 | -1.119911000 |
| C  | 4.192275000  | -1.640765000 | 1.267445000  |
| C  | 4.856160000  | -1.258075000 | 0.105626000  |
| H  | 4.714304000  | -1.019533000 | -2.026313000 |
| H  | 4.707328000  | -1.615022000 | 2.221143000  |
| H  | 5.884428000  | -0.922219000 | 0.153716000  |
| C  | -3.279751000 | -1.631728000 | 0.009745000  |
| C  | -3.784077000 | -1.177193000 | 1.244229000  |
| C  | -3.962379000 | -1.375264000 | -1.194930000 |
| C  | -4.998153000 | -0.485598000 | 1.255308000  |
| C  | -5.173425000 | -0.681124000 | -1.142255000 |
| C  | -5.692635000 | -0.242159000 | 0.073069000  |
| H  | -5.395944000 | -0.135440000 | 2.200294000  |
| H  | -5.705670000 | -0.479703000 | -2.064384000 |
| H  | -6.634010000 | 0.292373000  | 0.098655000  |
| C  | 2.151180000  | -1.830443000 | -2.513625000 |
| H  | 1.960442000  | -2.874998000 | -2.776893000 |
| H  | 1.173908000  | -1.343134000 | -2.456547000 |
| H  | 2.728779000  | -1.370494000 | -3.315315000 |
| C  | 2.140715000  | -2.505184000 | 2.470926000  |
| H  | 1.128065000  | -2.094888000 | 2.508337000  |

|                                                                                                         |              |              |                                       |
|---------------------------------------------------------------------------------------------------------|--------------|--------------|---------------------------------------|
| H                                                                                                       | 2.032186000  | -3.592885000 | 2.506068000                           |
| H                                                                                                       | 2.681013000  | -2.195575000 | 3.367326000                           |
| C                                                                                                       | -3.000841000 | -1.411605000 | 2.503867000                           |
| H                                                                                                       | -2.814227000 | -2.474905000 | 2.669684000                           |
| H                                                                                                       | -2.016258000 | -0.932934000 | 2.444277000                           |
| H                                                                                                       | -3.524381000 | -1.011378000 | 3.372386000                           |
| C                                                                                                       | -3.362217000 | -1.814657000 | -2.498883000                          |
| H                                                                                                       | -2.336651000 | -1.443774000 | -2.596165000                          |
| H                                                                                                       | -3.299724000 | -2.903247000 | -2.570211000                          |
| H                                                                                                       | -3.946139000 | -1.448336000 | -3.343532000                          |
| P                                                                                                       | 0.377549000  | 1.079300000  | -0.037854000                          |
| C                                                                                                       | 1.872084000  | 1.567328000  | -0.982000000                          |
| C                                                                                                       | 3.047715000  | 2.019399000  | -0.374829000                          |
| C                                                                                                       | 1.835394000  | 1.439022000  | -2.378374000                          |
| C                                                                                                       | 4.165109000  | 2.330769000  | -1.148560000                          |
| H                                                                                                       | 3.097016000  | 2.123899000  | 0.700261000                           |
| C                                                                                                       | 2.947647000  | 1.759295000  | -3.148543000                          |
| H                                                                                                       | 0.929867000  | 1.091524000  | -2.861624000                          |
| C                                                                                                       | 4.119546000  | 2.202525000  | -2.533642000                          |
| H                                                                                                       | 5.070953000  | 2.671199000  | -0.663573000                          |
| H                                                                                                       | 2.902125000  | 1.659513000  | -4.225654000                          |
| H                                                                                                       | 4.988234000  | 2.445681000  | -3.132089000                          |
| C                                                                                                       | -0.887239000 | 2.243536000  | -0.692573000                          |
| C                                                                                                       | -0.568105000 | 3.459178000  | -1.313598000                          |
| C                                                                                                       | -2.237876000 | 1.898836000  | -0.536116000                          |
| C                                                                                                       | -1.578043000 | 4.303913000  | -1.769646000                          |
| H                                                                                                       | 0.469015000  | 3.738867000  | -1.446190000                          |
| C                                                                                                       | -3.246649000 | 2.745287000  | -0.989902000                          |
| H                                                                                                       | -2.515543000 | 0.964403000  | -0.058509000                          |
| C                                                                                                       | -2.917476000 | 3.949372000  | -1.609237000                          |
| H                                                                                                       | -1.318133000 | 5.238195000  | -2.250941000                          |
| H                                                                                                       | -4.280142000 | 2.451395000  | -0.863450000                          |
| H                                                                                                       | -3.698965000 | 4.606635000  | -1.968616000                          |
| C                                                                                                       | 0.710003000  | 1.758760000  | 1.634202000                           |
| C                                                                                                       | 0.197025000  | 2.978791000  | 2.089476000                           |
| C                                                                                                       | 1.507399000  | 0.991538000  | 2.494914000                           |
| C                                                                                                       | 0.480493000  | 3.421162000  | 3.381307000                           |
| H                                                                                                       | -0.426616000 | 3.579722000  | 1.440925000                           |
| C                                                                                                       | 1.798487000  | 1.441200000  | 3.779144000                           |
| H                                                                                                       | 1.906076000  | 0.049442000  | 2.144583000                           |
| C                                                                                                       | 1.282209000  | 2.657109000  | 4.226927000                           |
| H                                                                                                       | 0.074228000  | 4.364186000  | 3.724455000                           |
| H                                                                                                       | 2.421442000  | 0.840128000  | 4.429354000                           |
| H                                                                                                       | 1.500535000  | 3.004620000  | 5.228607000                           |
| Sum of electronic and thermal Energies=                                                                 |              |              | -2003.218538                          |
| Sum of electronic and thermal Enthalpies=                                                               |              |              | -2003.217594                          |
| Sum of electronic and thermal Free Energies=                                                            |              |              | -2003.329421                          |
| Lowest vibration frequencies (/cm <sup>-1</sup> ) :                                                     |              |              | -14.0677(*)      10.2423      17.7229 |
| (*) corresponds to the rotation of one phenyl group around the P—Ph bond of the PPh <sub>3</sub> moiety |              |              |                                       |

|    |              |              |              |
|----|--------------|--------------|--------------|
| Fe | -0.800382000 | -1.570470000 | -0.075780000 |
| N  | 1.069518000  | -1.548337000 | 0.339977000  |
| N  | -2.679615000 | -1.553841000 | -0.445174000 |
| Si | 1.538063000  | -0.218686000 | 1.348509000  |
| Si | 2.007476000  | -2.888630000 | -0.225109000 |
| Si | -3.156444000 | -0.741426000 | -1.898132000 |
| Si | -3.651089000 | -2.395780000 | 0.716235000  |
| C  | 3.120075000  | -3.664321000 | 1.132879000  |
| H  | 2.506488000  | -4.034569000 | 1.967753000  |
| H  | 3.692495000  | -4.517266000 | 0.734801000  |
| H  | 3.841645000  | -2.946453000 | 1.547668000  |
| C  | 3.172989000  | -2.425118000 | -1.674098000 |
| H  | 2.591493000  | -2.014700000 | -2.513045000 |
| H  | 3.910549000  | -1.664210000 | -1.382474000 |
| H  | 3.725780000  | -3.303017000 | -2.045416000 |
| C  | 3.343477000  | 0.370293000  | 1.052082000  |
| H  | 4.088534000  | -0.415667000 | 1.240236000  |
| H  | 3.480878000  | 0.716126000  | 0.016874000  |
| H  | 3.582245000  | 1.215342000  | 1.717301000  |
| C  | 1.429504000  | -0.614408000 | 3.219082000  |
| H  | 1.718542000  | 0.251736000  | 3.836047000  |
| H  | 0.402794000  | -0.897483000 | 3.491825000  |
| H  | 2.084965000  | -1.454582000 | 3.491208000  |
| C  | 0.495617000  | 1.357752000  | 1.071776000  |
| H  | 0.524979000  | 1.663460000  | 0.015887000  |
| H  | -0.559415000 | 1.201891000  | 1.336393000  |
| H  | 0.884454000  | 2.192656000  | 1.680000000  |
| C  | -1.732361000 | -0.494330000 | -3.146437000 |
| H  | -2.106490000 | -0.011474000 | -4.065881000 |
| H  | -0.930703000 | 0.132765000  | -2.731946000 |
| H  | -1.279972000 | -1.456407000 | -3.426788000 |
| C  | -4.030072000 | -4.202203000 | 0.204513000  |
| H  | -4.630834000 | -4.725155000 | 0.965963000  |
| H  | -4.580106000 | -4.246599000 | -0.746520000 |
| H  | -3.093764000 | -4.762873000 | 0.068521000  |
| C  | -5.354994000 | -1.566305000 | 1.030942000  |
| H  | -5.932896000 | -2.140924000 | 1.772126000  |
| H  | -5.224187000 | -0.549258000 | 1.429602000  |
| H  | -5.968887000 | -1.489184000 | 0.122680000  |
| C  | -4.496648000 | -1.687645000 | -2.896636000 |
| H  | -4.127544000 | -2.680462000 | -3.194421000 |
| H  | -5.425420000 | -1.838624000 | -2.328321000 |
| H  | -4.757753000 | -1.140396000 | -3.816420000 |
| C  | -3.867317000 | 1.007479000  | -1.573056000 |
| H  | -4.776439000 | 0.970319000  | -0.956006000 |
| H  | -3.130050000 | 1.621576000  | -1.035251000 |
| H  | -4.118497000 | 1.525855000  | -2.512314000 |
| C  | -2.865618000 | -2.493699000 | 2.454218000  |
| H  | -1.920280000 | -3.053758000 | 2.444820000  |
| H  | -2.644600000 | -1.487848000 | 2.839498000  |
| H  | -3.552594000 | -2.987579000 | 3.163090000  |

|                                                     |             |              |              |
|-----------------------------------------------------|-------------|--------------|--------------|
| C                                                   | 0.956819000 | -4.346729000 | -0.869440000 |
| H                                                   | 0.282847000 | -4.725316000 | -0.087746000 |
| H                                                   | 0.330126000 | -4.050423000 | -1.722218000 |
| H                                                   | 1.607460000 | -5.177650000 | -1.193174000 |
| Sum of electronic and thermal Energies=             |             |              | -3009.711572 |
| Sum of electronic and thermal Enthalpies=           |             |              | -3009.710627 |
| Sum of electronic and thermal Free Energies=        |             |              | -3009.817988 |
| Lowest vibration frequencies (/cm <sup>-1</sup> ) : | 13.4739     | 20.6315      | 26.2646      |

### <sup>210</sup>

|    |              |              |              |
|----|--------------|--------------|--------------|
| Fe | -0.797145000 | -1.582618000 | -0.040487000 |
| N  | 1.063147000  | -1.526519000 | 0.279019000  |
| N  | -2.665644000 | -1.585546000 | -0.401868000 |
| Si | 1.513594000  | -0.136675000 | 1.217607000  |
| Si | 1.982331000  | -2.918770000 | -0.189488000 |
| Si | -3.141792000 | -0.686433000 | -1.803121000 |
| Si | -3.622667000 | -2.507174000 | 0.708766000  |
| C  | 2.967394000  | -3.696242000 | 1.261730000  |
| H  | 2.281735000  | -4.022379000 | 2.058025000  |
| H  | 3.536019000  | -4.578803000 | 0.928058000  |
| H  | 3.681368000  | -2.991634000 | 1.711278000  |
| C  | 3.255604000  | -2.519751000 | -1.565531000 |
| H  | 2.744128000  | -2.094111000 | -2.441832000 |
| H  | 4.008838000  | -1.790044000 | -1.237717000 |
| H  | 3.787456000  | -3.426503000 | -1.895323000 |
| C  | 3.362278000  | 0.351320000  | 1.005450000  |
| H  | 4.054767000  | -0.452411000 | 1.293822000  |
| H  | 3.584880000  | 0.622869000  | -0.037127000 |
| H  | 3.597646000  | 1.227072000  | 1.631027000  |
| C  | 1.274138000  | -0.396959000 | 3.098268000  |
| H  | 1.556770000  | 0.500424000  | 3.671943000  |
| H  | 0.223741000  | -0.629391000 | 3.323108000  |
| H  | 1.882852000  | -1.236531000 | 3.464808000  |
| C  | 0.576379000  | 1.462617000  | 0.758003000  |
| H  | 0.674814000  | 1.676333000  | -0.316222000 |
| H  | -0.496221000 | 1.378714000  | 0.978332000  |
| H  | 0.980244000  | 2.325437000  | 1.315372000  |
| C  | -1.725711000 | -0.406338000 | -3.053394000 |
| H  | -2.099336000 | 0.117819000  | -3.950025000 |
| H  | -0.911511000 | 0.190761000  | -2.620488000 |
| H  | -1.290978000 | -1.363575000 | -3.375616000 |
| C  | -3.988150000 | -4.283181000 | 0.091230000  |
| H  | -4.588796000 | -4.852446000 | 0.818815000  |
| H  | -4.534243000 | -4.274786000 | -0.863084000 |
| H  | -3.048537000 | -4.830366000 | -0.073103000 |
| C  | -5.332085000 | -1.710955000 | 1.075562000  |
| H  | -5.900117000 | -2.324105000 | 1.793130000  |
| H  | -5.207485000 | -0.711736000 | 1.518822000  |
| H  | -5.952280000 | -1.597948000 | 0.175408000  |
| C  | -4.508458000 | -1.551258000 | -2.841573000 |
| H  | -4.161121000 | -2.531960000 | -3.199788000 |

|                                                     |              |              |              |
|-----------------------------------------------------|--------------|--------------|--------------|
| H                                                   | -5.436967000 | -1.716599000 | -2.276886000 |
| H                                                   | -4.763694000 | -0.946706000 | -3.726464000 |
| C                                                   | -3.821140000 | 1.051380000  | -1.373712000 |
| H                                                   | -4.719328000 | 0.990952000  | -0.742356000 |
| H                                                   | -3.066362000 | 1.627000000  | -0.818499000 |
| H                                                   | -4.084022000 | 1.621993000  | -2.278814000 |
| C                                                   | -2.828003000 | -2.701037000 | 2.434532000  |
| H                                                   | -1.870870000 | -3.238447000 | 2.385939000  |
| H                                                   | -2.626270000 | -1.716865000 | 2.881375000  |
| H                                                   | -3.500504000 | -3.253237000 | 3.113443000  |
| C                                                   | 0.935625000  | -4.353489000 | -0.887149000 |
| H                                                   | 0.211950000  | -4.716566000 | -0.144179000 |
| H                                                   | 0.362228000  | -4.042529000 | -1.771469000 |
| H                                                   | 1.584354000  | -5.198624000 | -1.176855000 |
| Sum of electronic and thermal Energies=             |              |              | -3009.662320 |
| Sum of electronic and thermal Enthalpies=           |              |              | -3009.661376 |
| Sum of electronic and thermal Free Energies=        |              |              | -3009.767805 |
| Lowest vibration frequencies (/cm <sup>-1</sup> ) : | 19.1938      | 25.9383      | 28.0288      |

**<sup>4</sup>11**

|    |              |              |              |
|----|--------------|--------------|--------------|
| Fe | -0.727935000 | -1.527821000 | 0.318334000  |
| N  | 1.067652000  | -1.247726000 | 0.914255000  |
| Si | 1.908360000  | -2.708000000 | 1.440157000  |
| C  | 3.595098000  | -2.372231000 | 2.249085000  |
| H  | 3.493639000  | -1.875540000 | 3.222131000  |
| H  | 4.117236000  | -3.326317000 | 2.416370000  |
| H  | 4.241445000  | -1.741099000 | 1.627218000  |
| C  | 2.207741000  | -3.907148000 | -0.015405000 |
| H  | 1.298840000  | -4.078400000 | -0.609750000 |
| H  | 2.977523000  | -3.528279000 | -0.701260000 |
| H  | 2.547845000  | -4.886832000 | 0.354419000  |
| C  | 1.654770000  | 0.038240000  | 1.031872000  |
| C  | 2.507745000  | 0.554897000  | 0.000427000  |
| C  | 1.414727000  | 0.866619000  | 2.177215000  |
| C  | 3.111682000  | 1.810525000  | 0.157952000  |
| C  | 2.047644000  | 2.114478000  | 2.280333000  |
| C  | 2.902472000  | 2.591978000  | 1.291141000  |
| H  | 3.765552000  | 2.186943000  | -0.631128000 |
| H  | 1.871246000  | 2.727692000  | 3.166158000  |
| H  | 3.391623000  | 3.562027000  | 1.397817000  |
| C  | -4.326148000 | -1.650630000 | -1.888198000 |
| C  | -4.671770000 | -2.464636000 | -0.860796000 |
| H  | -4.887246000 | -1.317836000 | -2.751554000 |
| H  | -5.595674000 | -2.985437000 | -0.647888000 |
| C  | -2.485700000 | -1.807064000 | -0.502579000 |
| C  | -3.577492000 | -3.437079000 | 1.110703000  |
| C  | -4.081016000 | -2.949844000 | 2.342026000  |
| C  | -3.199630000 | -4.793515000 | 0.937595000  |
| C  | -4.153201000 | -3.848245000 | 3.417567000  |
| C  | -3.293130000 | -5.640725000 | 2.052449000  |
| C  | -3.756417000 | -5.176172000 | 3.281222000  |

|   |              |              |              |
|---|--------------|--------------|--------------|
| H | -4.533780000 | -3.503225000 | 4.378513000  |
| H | -3.009018000 | -6.688015000 | 1.953507000  |
| H | -3.819713000 | -5.855384000 | 4.133039000  |
| C | -2.350531000 | -0.399934000 | -2.614391000 |
| C | -2.441061000 | 1.003415000  | -2.446420000 |
| C | -1.752161000 | -0.985311000 | -3.757501000 |
| C | -1.907626000 | 1.813806000  | -3.460673000 |
| C | -1.238906000 | -0.121569000 | -4.736247000 |
| C | -1.316453000 | 1.262296000  | -4.594958000 |
| H | -1.965385000 | 2.897834000  | -3.364289000 |
| H | -0.774912000 | -0.540060000 | -5.629474000 |
| H | -0.913755000 | 1.913979000  | -5.372124000 |
| N | -3.564831000 | -2.563493000 | -0.031769000 |
| N | -3.014451000 | -1.258419000 | -1.670903000 |
| C | 0.864837000  | -3.667361000 | 2.715556000  |
| H | 0.733699000  | -3.086579000 | 3.639084000  |
| H | -0.139364000 | -3.921471000 | 2.348729000  |
| H | 1.362207000  | -4.612325000 | 2.985371000  |
| C | 2.761468000  | -0.204989000 | -1.294824000 |
| H | 2.186627000  | -1.137366000 | -1.222511000 |
| C | 0.481250000  | 0.447854000  | 3.306120000  |
| H | 0.046400000  | -0.518624000 | 3.011274000  |
| C | 4.238389000  | -0.571780000 | -1.504094000 |
| H | 4.358283000  | -1.177162000 | -2.415786000 |
| H | 4.867786000  | 0.322592000  | -1.621307000 |
| H | 4.640742000  | -1.149049000 | -0.662776000 |
| C | 2.231532000  | 0.566354000  | -2.512575000 |
| H | 2.782130000  | 1.505105000  | -2.671453000 |
| H | 2.337475000  | -0.035727000 | -3.427622000 |
| H | 1.171105000  | 0.817774000  | -2.394944000 |
| C | 1.217040000  | 0.239495000  | 4.638775000  |
| H | 2.025097000  | -0.495358000 | 4.542427000  |
| H | 1.663680000  | 1.174892000  | 5.005932000  |
| H | 0.522038000  | -0.120773000 | 5.412934000  |
| C | -0.673042000 | 1.445022000  | 3.489625000  |
| H | -0.309129000 | 2.445022000  | 3.764923000  |
| H | -1.261058000 | 1.551110000  | 2.568501000  |
| H | -1.349958000 | 1.113853000  | 4.290274000  |
| C | -1.679189000 | -2.491893000 | -3.968928000 |
| H | -2.096037000 | -2.969700000 | -3.073971000 |
| C | -3.124653000 | 1.647706000  | -1.248002000 |
| H | -3.337386000 | 0.852236000  | -0.521829000 |
| C | -4.589907000 | -1.524784000 | 2.514419000  |
| H | -4.244321000 | -0.944028000 | 1.648874000  |
| C | -2.774976000 | -5.365490000 | -0.409560000 |
| H | -2.542940000 | -4.518469000 | -1.067410000 |
| C | -3.927269000 | -6.152322000 | -1.058456000 |
| H | -4.823228000 | -5.532342000 | -1.190903000 |
| H | -3.625434000 | -6.522202000 | -2.049424000 |
| H | -4.209620000 | -7.021729000 | -0.447706000 |
| C | -1.511383000 | -6.233774000 | -0.332551000 |



|                                                     |              |              |                                                                   |
|-----------------------------------------------------|--------------|--------------|-------------------------------------------------------------------|
| H                                                   | -1.686106000 | -7.177293000 | 0.202602000                                                       |
| H                                                   | -1.178764000 | -6.496657000 | -1.347011000                                                      |
| H                                                   | -0.688703000 | -5.709712000 | 0.167177000                                                       |
| C                                                   | -6.127737000 | -1.481288000 | 2.517225000                                                       |
| H                                                   | -6.540330000 | -2.044172000 | 3.366621000                                                       |
| H                                                   | -6.479204000 | -0.442440000 | 2.600676000                                                       |
| H                                                   | -6.551968000 | -1.905940000 | 1.598154000                                                       |
| C                                                   | -4.029405000 | -0.842419000 | 3.769090000                                                       |
| H                                                   | -4.296910000 | 0.223563000  | 3.767400000                                                       |
| H                                                   | -4.433957000 | -1.275891000 | 4.694325000                                                       |
| H                                                   | -2.936589000 | -0.917960000 | 3.808677000                                                       |
| C                                                   | -2.536887000 | -2.939583000 | -5.163543000                                                      |
| H                                                   | -2.163509000 | -2.526591000 | -6.111191000                                                      |
| H                                                   | -2.524219000 | -4.035822000 | -5.251732000                                                      |
| H                                                   | -3.582998000 | -2.623315000 | -5.051715000                                                      |
| C                                                   | -0.232660000 | -2.989430000 | -4.105086000                                                      |
| H                                                   | 0.370224000  | -2.695650000 | -3.236863000                                                      |
| H                                                   | -0.216003000 | -4.086944000 | -4.175691000                                                      |
| H                                                   | 0.256795000  | -2.595098000 | -5.006442000                                                      |
| C                                                   | -4.470789000 | 2.277187000  | -1.643536000                                                      |
| H                                                   | -4.335534000 | 3.102373000  | -2.357079000                                                      |
| H                                                   | -5.142469000 | 1.541657000  | -2.106315000                                                      |
| H                                                   | -4.977090000 | 2.683786000  | -0.755744000                                                      |
| C                                                   | -2.225220000 | 2.671591000  | -0.539524000                                                      |
| H                                                   | -2.024126000 | 3.551689000  | -1.165857000                                                      |
| H                                                   | -2.716235000 | 3.031153000  | 0.376113000                                                       |
| H                                                   | -1.259002000 | 2.235114000  | -0.256415000                                                      |
| Sum of electronic and thermal Energies=             |              |              | -3353.755824                                                      |
| Sum of electronic and thermal Enthalpies=           |              |              | -3353.754880                                                      |
| Sum of electronic and thermal Free Energies=        |              |              | -3353.906511                                                      |
| Lowest vibration frequencies (/cm <sup>-1</sup> ) : |              |              | 14.3773                      22.3194                      25.5295 |

**<sup>2</sup>11**

|    |              |              |              |
|----|--------------|--------------|--------------|
| Fe | -0.732817000 | -1.552548000 | 0.344061000  |
| N  | 1.069197000  | -1.267023000 | 0.863983000  |
| Si | 1.911540000  | -2.734649000 | 1.377820000  |
| C  | 3.612350000  | -2.399690000 | 2.159467000  |
| H  | 3.521015000  | -1.932729000 | 3.148389000  |
| H  | 4.147965000  | -3.352007000 | 2.290525000  |
| H  | 4.240828000  | -1.743273000 | 1.546104000  |
| C  | 2.177356000  | -3.924382000 | -0.089930000 |
| H  | 1.247267000  | -4.115433000 | -0.643565000 |
| H  | 2.907207000  | -3.524878000 | -0.807296000 |
| H  | 2.556374000  | -4.896110000 | 0.262475000  |
| C  | 1.644095000  | 0.019594000  | 1.010800000  |
| C  | 2.494702000  | 0.559781000  | -0.011270000 |
| C  | 1.400941000  | 0.822691000  | 2.173421000  |
| C  | 3.091990000  | 1.814755000  | 0.171490000  |
| C  | 2.025161000  | 2.072490000  | 2.299679000  |
| C  | 2.876452000  | 2.573596000  | 1.318982000  |
| H  | 3.744491000  | 2.210174000  | -0.609274000 |

|   |              |              |              |
|---|--------------|--------------|--------------|
| H | 1.846628000  | 2.667992000  | 3.197088000  |
| H | 3.358681000  | 3.544918000  | 1.443611000  |
| C | -4.297020000 | -1.635802000 | -1.883785000 |
| C | -4.649424000 | -2.464555000 | -0.871115000 |
| H | -4.850050000 | -1.294509000 | -2.748970000 |
| H | -5.573080000 | -2.992080000 | -0.674260000 |
| C | -2.468449000 | -1.797748000 | -0.478898000 |
| C | -3.587776000 | -3.423881000 | 1.122815000  |
| C | -4.127238000 | -2.920261000 | 2.332433000  |
| C | -3.197223000 | -4.780587000 | 0.982708000  |
| C | -4.217809000 | -3.800531000 | 3.421813000  |
| C | -3.309608000 | -5.608706000 | 2.109876000  |
| C | -3.805433000 | -5.126475000 | 3.319227000  |
| H | -4.625749000 | -3.442484000 | 4.366684000  |
| H | -3.014105000 | -6.654918000 | 2.036801000  |
| H | -3.882893000 | -5.790923000 | 4.181470000  |
| C | -2.321247000 | -0.383240000 | -2.589301000 |
| C | -2.411842000 | 1.020443000  | -2.426707000 |
| C | -1.727499000 | -0.972329000 | -3.733150000 |
| C | -1.885874000 | 1.827460000  | -3.447352000 |
| C | -1.221345000 | -0.111874000 | -4.718551000 |
| C | -1.301589000 | 1.272291000  | -4.583505000 |
| H | -1.943941000 | 2.911845000  | -3.354584000 |
| H | -0.761555000 | -0.533405000 | -5.612535000 |
| H | -0.905569000 | 1.921413000  | -5.366251000 |
| N | -3.551026000 | -2.567028000 | -0.031597000 |
| N | -2.989566000 | -1.239290000 | -1.646192000 |
| C | 0.904943000  | -3.696538000 | 2.681422000  |
| H | 0.804516000  | -3.120419000 | 3.611689000  |
| H | -0.109968000 | -3.950453000 | 2.346374000  |
| H | 1.414453000  | -4.640812000 | 2.931098000  |
| C | 2.753538000  | -0.174936000 | -1.320154000 |
| H | 2.174229000  | -1.106085000 | -1.270986000 |
| C | 0.477582000  | 0.371571000  | 3.297535000  |
| H | 0.059061000  | -0.599155000 | 2.990716000  |
| C | 4.230206000  | -0.543999000 | -1.528161000 |
| H | 4.353552000  | -1.122750000 | -2.456504000 |
| H | 4.865007000  | 0.350068000  | -1.614208000 |
| H | 4.623213000  | -1.148643000 | -0.702057000 |
| C | 2.236509000  | 0.624374000  | -2.525282000 |
| H | 2.797752000  | 1.559883000  | -2.664091000 |
| H | 2.340755000  | 0.038382000  | -3.450819000 |
| H | 1.178478000  | 0.883773000  | -2.406829000 |
| C | 1.221133000  | 0.157949000  | 4.625003000  |
| H | 2.051693000  | -0.549101000 | 4.512218000  |
| H | 1.639190000  | 1.098737000  | 5.011365000  |
| H | 0.538744000  | -0.239597000 | 5.391959000  |
| C | -0.694312000 | 1.344584000  | 3.496294000  |
| H | -0.346851000 | 2.349298000  | 3.775499000  |
| H | -1.290233000 | 1.444985000  | 2.579634000  |
| H | -1.358956000 | 0.995657000  | 4.299632000  |

|                                              |              |              |              |
|----------------------------------------------|--------------|--------------|--------------|
| C                                            | -1.649016000 | -2.479707000 | -3.938230000 |
| H                                            | -2.056360000 | -2.955787000 | -3.038035000 |
| C                                            | -3.088834000 | 1.668341000  | -1.226670000 |
| H                                            | -3.296935000 | 0.874809000  | -0.497046000 |
| C                                            | -4.656135000 | -1.498262000 | 2.467893000  |
| H                                            | -4.298820000 | -0.928260000 | 1.600015000  |
| C                                            | -2.740637000 | -5.371777000 | -0.345611000 |
| H                                            | -2.471370000 | -4.534170000 | -1.001495000 |
| C                                            | -3.887368000 | -6.141988000 | -1.024017000 |
| H                                            | -4.764161000 | -5.504716000 | -1.195162000 |
| H                                            | -3.559927000 | -6.531551000 | -1.999187000 |
| H                                            | -4.208494000 | -6.996640000 | -0.411620000 |
| C                                            | -1.498595000 | -6.265282000 | -0.224018000 |
| H                                            | -1.712635000 | -7.207302000 | 0.299411000  |
| H                                            | -1.133807000 | -6.531825000 | -1.226362000 |
| H                                            | -0.684351000 | -5.760223000 | 0.307794000  |
| C                                            | -6.194084000 | -1.471717000 | 2.436079000  |
| H                                            | -6.619719000 | -2.027439000 | 3.283753000  |
| H                                            | -6.557589000 | -0.435404000 | 2.497692000  |
| H                                            | -6.593162000 | -1.912510000 | 1.513549000  |
| C                                            | -4.132951000 | -0.787486000 | 3.722898000  |
| H                                            | -4.409332000 | 0.275952000  | 3.694640000  |
| H                                            | -4.557308000 | -1.207429000 | 4.645527000  |
| H                                            | -3.040981000 | -0.852325000 | 3.791900000  |
| C                                            | -2.511978000 | -2.938268000 | -5.124902000 |
| H                                            | -2.146945000 | -2.527659000 | -6.076827000 |
| H                                            | -2.493507000 | -4.034835000 | -5.207843000 |
| H                                            | -3.559076000 | -2.627700000 | -5.007703000 |
| C                                            | -0.200936000 | -2.970375000 | -4.083263000 |
| H                                            | 0.407709000  | -2.668301000 | -3.222141000 |
| H                                            | -0.178753000 | -4.068248000 | -4.147196000 |
| H                                            | 0.279121000  | -2.579315000 | -4.991069000 |
| C                                            | -4.437072000 | 2.296408000  | -1.617133000 |
| H                                            | -4.305950000 | 3.118755000  | -2.334767000 |
| H                                            | -5.111333000 | 1.559006000  | -2.073285000 |
| H                                            | -4.938527000 | 2.706595000  | -0.728228000 |
| C                                            | -2.184887000 | 2.693709000  | -0.526390000 |
| H                                            | -1.984774000 | 3.570602000  | -1.157615000 |
| H                                            | -2.671799000 | 3.058353000  | 0.389525000  |
| H                                            | -1.219070000 | 2.255473000  | -0.245142000 |
| Sum of electronic and thermal Energies=      |              |              | -3353.713596 |
| Sum of electronic and thermal Enthalpies=    |              |              | -3353.712652 |
| Sum of electronic and thermal Free Energies= |              |              | -3353.862816 |
| Lowest vibration frequencies (/cm^-1) :      | 15.9747      | 21.9994      | 25.5142      |

**411'**

|    |              |              |             |
|----|--------------|--------------|-------------|
| Fe | -0.701025000 | -1.639143000 | 0.407208000 |
| N  | 1.185601000  | -1.438914000 | 0.560442000 |
| Si | 2.200599000  | -2.797525000 | 0.095567000 |
| C  | 3.615510000  | -3.053398000 | 1.336420000 |
| H  | 3.218057000  | -3.241019000 | 2.344180000 |

|                                         |              |              |              |
|-----------------------------------------|--------------|--------------|--------------|
| H                                       | 4.245313000  | -3.910730000 | 1.055580000  |
| H                                       | 4.263923000  | -2.168292000 | 1.399057000  |
| C                                       | 2.927566000  | -2.700877000 | -1.663661000 |
| H                                       | 2.148866000  | -2.441890000 | -2.395859000 |
| H                                       | 3.729621000  | -1.955635000 | -1.756014000 |
| H                                       | 3.351825000  | -3.673489000 | -1.957120000 |
| C                                       | 1.600794000  | -0.156479000 | 0.900724000  |
| C                                       | 2.711905000  | 0.509603000  | 0.321393000  |
| C                                       | 0.860324000  | 0.583109000  | 1.862995000  |
| C                                       | 3.037452000  | 1.821654000  | 0.666970000  |
| H                                       | 3.307599000  | -0.004730000 | -0.431529000 |
| C                                       | 1.180438000  | 1.900338000  | 2.193890000  |
| H                                       | 0.043374000  | 0.075035000  | 2.386183000  |
| C                                       | 2.274557000  | 2.536748000  | 1.597955000  |
| H                                       | 3.898578000  | 2.296919000  | 0.191133000  |
| H                                       | 0.580370000  | 2.425993000  | 2.940203000  |
| H                                       | 2.533155000  | 3.563554000  | 1.859683000  |
| C                                       | -4.351693000 | -1.663539000 | -1.616830000 |
| C                                       | -4.706429000 | -2.408135000 | -0.539390000 |
| H                                       | -4.937630000 | -1.336487000 | -2.466039000 |
| H                                       | -5.658962000 | -2.848136000 | -0.273343000 |
| C                                       | -2.517850000 | -1.760435000 | -0.229629000 |
| C                                       | -3.571038000 | -3.150518000 | 1.532517000  |
| C                                       | -2.930827000 | -2.579184000 | 2.644479000  |
| C                                       | -4.169026000 | -4.415859000 | 1.648448000  |
| C                                       | -2.880340000 | -3.276961000 | 3.853153000  |
| H                                       | -2.512435000 | -1.575368000 | 2.566857000  |
| C                                       | -4.126364000 | -5.096427000 | 2.866341000  |
| H                                       | -4.636303000 | -4.878148000 | 0.778939000  |
| C                                       | -3.478004000 | -4.535253000 | 3.972000000  |
| H                                       | -2.382243000 | -2.822438000 | 4.710603000  |
| H                                       | -4.587716000 | -6.082047000 | 2.943254000  |
| H                                       | -3.439390000 | -5.075160000 | 4.918650000  |
| C                                       | -2.302786000 | -0.472285000 | -2.336402000 |
| C                                       | -1.443796000 | 0.531650000  | -1.862366000 |
| C                                       | -2.423206000 | -0.694609000 | -3.716709000 |
| C                                       | -0.703638000 | 1.296352000  | -2.766814000 |
| H                                       | -1.389167000 | 0.743669000  | -0.794450000 |
| C                                       | -1.692160000 | 0.088804000  | -4.612540000 |
| H                                       | -3.058292000 | -1.499887000 | -4.086078000 |
| C                                       | -0.825829000 | 1.081435000  | -4.143182000 |
| H                                       | -0.034321000 | 2.067915000  | -2.384971000 |
| H                                       | -1.788109000 | -0.094467000 | -5.683756000 |
| H                                       | -0.248142000 | 1.682720000  | -4.846181000 |
| N                                       | -3.604054000 | -2.454802000 | 0.302491000  |
| N                                       | -3.037973000 | -1.263198000 | -1.421555000 |
| C                                       | 1.066649000  | -4.325156000 | 0.131907000  |
| H                                       | 0.606453000  | -4.472884000 | 1.119891000  |
| H                                       | 0.259810000  | -4.277600000 | -0.615875000 |
| H                                       | 1.652836000  | -5.229463000 | -0.093727000 |
| Sum of electronic and thermal Energies= |              |              | -2646.991973 |

Sum of electronic and thermal Enthalpies= -2646.991029  
 Sum of electronic and thermal Free Energies= -2647.091602  
 Lowest vibration frequencies (/cm<sup>-1</sup>): 3.2004 10.8811 21.0638

**211'**

|    |              |              |              |
|----|--------------|--------------|--------------|
| Fe | -0.417912000 | -1.379405000 | 0.311283000  |
| N  | 1.283157000  | -2.056931000 | 0.836718000  |
| Si | 2.339555000  | -3.249527000 | 0.095098000  |
| C  | 3.981405000  | -3.311874000 | 1.049281000  |
| H  | 3.801854000  | -3.519071000 | 2.113752000  |
| H  | 4.634416000  | -4.105868000 | 0.657237000  |
| H  | 4.534231000  | -2.364080000 | 0.985727000  |
| C  | 2.699556000  | -2.958693000 | -1.753203000 |
| H  | 1.768106000  | -2.899252000 | -2.335294000 |
| H  | 3.260189000  | -2.031119000 | -1.934122000 |
| H  | 3.293087000  | -3.789258000 | -2.165438000 |
| C  | 1.386998000  | -0.702132000 | 1.027664000  |
| C  | 2.318589000  | 0.221634000  | 0.439417000  |
| C  | 0.294824000  | -0.145423000 | 1.820086000  |
| C  | 2.168784000  | 1.583874000  | 0.622467000  |
| H  | 3.155233000  | -0.163246000 | -0.143229000 |
| C  | 0.178992000  | 1.265491000  | 1.972720000  |
| H  | -0.155608000 | -0.798806000 | 2.579619000  |
| C  | 1.085859000  | 2.119451000  | 1.368917000  |
| H  | 2.901029000  | 2.264796000  | 0.182225000  |
| H  | -0.615235000 | 1.666149000  | 2.606926000  |
| H  | 0.996958000  | 3.199505000  | 1.496249000  |
| C  | -4.135538000 | -1.413034000 | -1.541199000 |
| C  | -4.438117000 | -2.135553000 | -0.432121000 |
| H  | -4.753389000 | -1.131632000 | -2.384191000 |
| H  | -5.361557000 | -2.615440000 | -0.132777000 |
| C  | -2.259853000 | -1.414711000 | -0.192705000 |
| C  | -3.274979000 | -2.747161000 | 1.655295000  |
| C  | -3.017948000 | -1.990064000 | 2.806521000  |
| C  | -3.529377000 | -4.121881000 | 1.759166000  |
| C  | -3.005804000 | -2.613109000 | 4.055796000  |
| H  | -2.846964000 | -0.918996000 | 2.711477000  |
| C  | -3.526324000 | -4.733925000 | 3.015325000  |
| H  | -3.708139000 | -4.706714000 | 0.856693000  |
| C  | -3.260777000 | -3.984782000 | 4.165094000  |
| H  | -2.808325000 | -2.019793000 | 4.949773000  |
| H  | -3.719580000 | -5.804959000 | 3.091131000  |
| H  | -3.252669000 | -4.467216000 | 5.143294000  |
| C  | -2.140109000 | -0.200253000 | -2.356407000 |
| C  | -1.270208000 | 0.823067000  | -1.947703000 |
| C  | -2.315873000 | -0.461501000 | -3.725372000 |
| C  | -0.578704000 | 1.567984000  | -2.904877000 |
| H  | -1.159296000 | 1.048016000  | -0.887112000 |
| C  | -1.632369000 | 0.303311000  | -4.672417000 |
| H  | -2.959670000 | -1.280313000 | -4.046441000 |
| C  | -0.757782000 | 1.317477000  | -4.269183000 |

|                                                     |              |              |                                               |
|-----------------------------------------------------|--------------|--------------|-----------------------------------------------|
| H                                                   | 0.096299000  | 2.357845000  | -2.573599000                                  |
| H                                                   | -1.772500000 | 0.089005000  | -5.733049000                                  |
| H                                                   | -0.218754000 | 1.905832000  | -5.012660000                                  |
| N                                                   | -3.319425000 | -2.113289000 | 0.384365000                                   |
| N                                                   | -2.831242000 | -0.966827000 | -1.389741000                                  |
| C                                                   | 1.448046000  | -4.911168000 | 0.268643000                                   |
| H                                                   | 1.239824000  | -5.133845000 | 1.324492000                                   |
| H                                                   | 0.486148000  | -4.904193000 | -0.263598000                                  |
| H                                                   | 2.053319000  | -5.733451000 | -0.140921000                                  |
| Sum of electronic and thermal Energies=             |              |              | -2646.961388                                  |
| Sum of electronic and thermal Enthalpies=           |              |              | -2646.960444                                  |
| Sum of electronic and thermal Free Energies=        |              |              | -2647.056137                                  |
| Lowest vibration frequencies (/cm <sup>-1</sup> ) : |              |              | 13.4300            23.7149            26.5447 |

**412**

|    |              |              |              |
|----|--------------|--------------|--------------|
| Fe | 0.989030000  | 0.123744000  | 0.000200000  |
| C  | 1.230285000  | 2.912230000  | 3.271598000  |
| C  | 2.145639000  | 2.005435000  | 3.741808000  |
| C  | 2.850588000  | -3.747482000 | -0.667188000 |
| C  | 3.941485000  | -2.921617000 | -0.761854000 |
| C  | -3.329205000 | -0.086888000 | 0.435498000  |
| C  | -2.925460000 | -0.727501000 | 1.579166000  |
| C  | 1.705512000  | 1.255826000  | -4.092638000 |
| C  | 2.278714000  | 2.352121000  | -3.500367000 |
| C  | -1.018140000 | -0.178095000 | 0.390888000  |
| C  | 2.115879000  | -1.591561000 | -0.261673000 |
| C  | 1.428058000  | 1.247671000  | 1.677464000  |
| C  | 1.424615000  | 1.026440000  | -1.807829000 |
| C  | -0.189190000 | 3.085256000  | 1.226537000  |
| H  | -0.192963000 | 2.613363000  | 0.240652000  |
| H  | -1.185029000 | 2.972738000  | 1.677182000  |
| H  | 0.032619000  | 4.154454000  | 1.116925000  |
| C  | 3.093915000  | -0.142906000 | 2.908773000  |
| H  | 2.902453000  | -0.801592000 | 2.058330000  |
| H  | 4.155007000  | 0.142945000  | 2.921367000  |
| H  | 2.866291000  | -0.679886000 | 3.839556000  |
| C  | 2.602883000  | 3.128636000  | -1.156132000 |
| H  | 2.415554000  | 2.713899000  | -0.162840000 |
| H  | 3.683349000  | 3.278022000  | -1.286293000 |
| H  | 2.102343000  | 4.102577000  | -1.249394000 |
| C  | 0.552734000  | -0.795504000 | -3.261342000 |
| H  | 1.278104000  | -1.556174000 | -3.581824000 |
| H  | 0.111654000  | -1.106749000 | -2.311211000 |
| H  | -0.236255000 | -0.714382000 | -4.020051000 |
| C  | 4.315971000  | -0.463978000 | -0.559283000 |
| H  | 5.217715000  | -0.609380000 | 0.049352000  |
| H  | 4.616334000  | -0.237590000 | -1.591727000 |
| H  | 3.745709000  | 0.380132000  | -0.164367000 |
| C  | 0.421771000  | -3.425236000 | -0.222486000 |
| H  | 0.340196000  | -4.094136000 | 0.645624000  |
| H  | -0.240806000 | -2.567283000 | -0.087116000 |

|                                           |              |              |              |
|-------------------------------------------|--------------|--------------|--------------|
| H                                         | 0.114752000  | -3.979306000 | -1.119918000 |
| C                                         | -0.720455000 | -1.340394000 | 2.572417000  |
| H                                         | 0.309330000  | -1.389093000 | 2.209898000  |
| H                                         | -0.749943000 | -0.717522000 | 3.477177000  |
| H                                         | -1.064801000 | -2.351278000 | 2.826165000  |
| C                                         | -2.172993000 | 0.946985000  | -1.513839000 |
| H                                         | -1.135246000 | 1.151509000  | -1.787579000 |
| H                                         | -2.651243000 | 0.351379000  | -2.303961000 |
| H                                         | -2.714591000 | 1.897746000  | -1.417324000 |
| N                                         | -1.536716000 | -0.772076000 | 1.523655000  |
| N                                         | -2.164100000 | 0.233317000  | -0.257262000 |
| N                                         | 1.197531000  | 0.481566000  | -3.055383000 |
| N                                         | 2.096851000  | 2.187377000  | -2.129326000 |
| N                                         | 2.242992000  | 1.016411000  | 2.765937000  |
| N                                         | 0.819919000  | 2.434889000  | 2.031617000  |
| N                                         | 1.768982000  | -2.922686000 | -0.368037000 |
| N                                         | 3.472695000  | -1.636903000 | -0.509974000 |
| C                                         | -4.692855000 | 0.242246000  | -0.063386000 |
| H                                         | -4.844162000 | 1.326439000  | -0.179378000 |
| H                                         | -4.900418000 | -0.222922000 | -1.039067000 |
| H                                         | -5.454995000 | -0.118220000 | 0.636033000  |
| C                                         | -3.715957000 | -1.299144000 | 2.703912000  |
| H                                         | -3.582466000 | -2.388192000 | 2.794916000  |
| H                                         | -3.440167000 | -0.853520000 | 3.671558000  |
| H                                         | -4.785414000 | -1.115744000 | 2.554431000  |
| C                                         | 5.368130000  | -3.226474000 | -1.059202000 |
| H                                         | 5.731479000  | -2.683122000 | -1.944479000 |
| H                                         | 6.032128000  | -2.967562000 | -0.220089000 |
| H                                         | 5.499645000  | -4.295684000 | -1.257335000 |
| C                                         | 2.733840000  | -5.223474000 | -0.823523000 |
| H                                         | 2.353763000  | -5.707809000 | 0.088853000  |
| H                                         | 2.059709000  | -5.503445000 | -1.647453000 |
| H                                         | 3.712479000  | -5.665020000 | -1.040849000 |
| C                                         | 2.965473000  | 3.530526000  | -4.097237000 |
| H                                         | 2.459585000  | 4.475246000  | -3.846204000 |
| H                                         | 4.009744000  | 3.619150000  | -3.760804000 |
| H                                         | 2.982331000  | 3.452524000  | -5.189732000 |
| C                                         | 1.588161000  | 0.876698000  | -5.527556000 |
| H                                         | 2.042977000  | -0.103653000 | -5.734987000 |
| H                                         | 0.539856000  | 0.828518000  | -5.860565000 |
| H                                         | 2.095936000  | 1.611054000  | -6.162085000 |
| C                                         | 0.715746000  | 4.173605000  | 3.872105000  |
| H                                         | 0.961384000  | 5.055392000  | 3.260405000  |
| H                                         | -0.377355000 | 4.156510000  | 3.998096000  |
| H                                         | 1.154846000  | 4.334680000  | 4.862564000  |
| C                                         | 2.932828000  | 1.986069000  | 5.005430000  |
| H                                         | 2.708071000  | 1.102820000  | 5.622781000  |
| H                                         | 4.017350000  | 1.986608000  | 4.817970000  |
| H                                         | 2.708249000  | 2.870541000  | 5.611365000  |
| Sum of electronic and thermal Energies=   |              |              | -2796.288864 |
| Sum of electronic and thermal Enthalpies= |              |              | -2796.287920 |

Sum of electronic and thermal Free Energies= -2796.414740  
 Lowest vibration frequencies (/cm<sup>-1</sup>) : 26.6718 27.7626 30.8862

**<sup>2</sup>12**

|    |              |              |              |
|----|--------------|--------------|--------------|
| Fe | 0.993777000  | 0.099356000  | 0.035122000  |
| C  | 1.641566000  | 2.745663000  | 3.289734000  |
| C  | 2.692491000  | 1.904500000  | 3.550890000  |
| C  | 2.492490000  | -3.959686000 | -0.443978000 |
| C  | 3.601996000  | -3.201202000 | -0.717399000 |
| C  | -3.289555000 | -0.166013000 | -0.078200000 |
| C  | -2.976262000 | -0.699630000 | 1.144014000  |
| C  | 1.718185000  | 1.561222000  | -3.806989000 |
| C  | 2.151841000  | 2.686629000  | -3.157429000 |
| C  | -0.976610000 | -0.137660000 | 0.100760000  |
| C  | 1.903798000  | -1.746270000 | -0.102628000 |
| C  | 1.685436000  | 1.152847000  | 1.604359000  |
| C  | 1.321342000  | 1.247937000  | -1.539018000 |
| C  | -0.139667000 | 2.859228000  | 1.553511000  |
| H  | -0.022809000 | 3.942737000  | 1.423927000  |
| H  | -0.307925000 | 2.378535000  | 0.585200000  |
| H  | -1.010214000 | 2.671403000  | 2.197237000  |
| C  | 3.589446000  | -0.177755000 | 2.543950000  |
| H  | 3.209934000  | -0.914883000 | 1.834668000  |
| H  | 4.611141000  | 0.118617000  | 2.268187000  |
| H  | 3.615690000  | -0.631130000 | 3.542913000  |
| C  | 2.300101000  | 3.447187000  | -0.807599000 |
| H  | 2.260614000  | 2.974015000  | 0.171732000  |
| H  | 3.326364000  | 3.788475000  | -0.992453000 |
| H  | 1.633123000  | 4.320854000  | -0.825099000 |
| C  | 0.742370000  | -0.616898000 | -3.110216000 |
| H  | 1.570584000  | -1.284730000 | -3.384227000 |
| H  | 0.261752000  | -1.009580000 | -2.209233000 |
| H  | 0.018272000  | -0.596541000 | -3.934329000 |
| C  | 4.095307000  | -0.763989000 | -0.796453000 |
| H  | 5.056654000  | -0.874611000 | -0.279152000 |
| H  | 4.282363000  | -0.682831000 | -1.876141000 |
| H  | 3.598327000  | 0.150870000  | -0.460191000 |
| C  | 0.143432000  | -3.500075000 | 0.208455000  |
| H  | 0.095618000  | -4.004881000 | 1.183690000  |
| H  | -0.506773000 | -2.626030000 | 0.212607000  |
| H  | -0.207816000 | -4.196762000 | -0.563115000 |
| C  | -0.870448000 | -1.051405000 | 2.425817000  |
| H  | 0.192862000  | -1.127582000 | 2.170236000  |
| H  | -0.985693000 | -0.291390000 | 3.211321000  |
| H  | -1.231665000 | -2.013991000 | 2.808759000  |
| C  | -2.037676000 | 0.900014000  | -1.928101000 |
| H  | -1.026051000 | 1.278649000  | -2.070544000 |
| H  | -2.317722000 | 0.256327000  | -2.773603000 |
| H  | -2.730121000 | 1.751141000  | -1.895484000 |
| N  | -1.590207000 | -0.673807000 | 1.229890000  |
| N  | -2.078507000 | 0.179404000  | -0.676474000 |



|                                                     |              |              |                                               |
|-----------------------------------------------------|--------------|--------------|-----------------------------------------------|
| N                                                   | 1.223224000  | 0.716146000  | -2.822310000                                  |
| N                                                   | 1.913959000  | 2.471785000  | -1.800937000                                  |
| N                                                   | 2.689127000  | 0.952165000  | 2.535449000                                   |
| N                                                   | 1.055596000  | 2.277245000  | 2.121424000                                   |
| N                                                   | 1.488148000  | -3.062696000 | -0.090955000                                  |
| N                                                   | 3.223540000  | -1.881624000 | -0.508036000                                  |
| C                                                   | 3.690762000  | 1.919031000  | 4.655673000                                   |
| H                                                   | 3.546218000  | 2.800587000  | 5.289542000                                   |
| H                                                   | 3.609911000  | 1.034817000  | 5.306718000                                   |
| H                                                   | 4.723674000  | 1.954749000  | 4.278184000                                   |
| C                                                   | 1.144366000  | 3.936877000  | 4.032013000                                   |
| H                                                   | 1.202454000  | 4.857103000  | 3.430621000                                   |
| H                                                   | 0.096696000  | 3.818312000  | 4.347039000                                   |
| H                                                   | 1.738435000  | 4.102133000  | 4.937311000                                   |
| C                                                   | 4.969181000  | -3.601285000 | -1.150946000                                  |
| H                                                   | 5.248750000  | -3.144434000 | -2.112183000                                  |
| H                                                   | 5.737777000  | -3.315152000 | -0.416638000                                  |
| H                                                   | 5.030046000  | -4.687473000 | -1.277900000                                  |
| C                                                   | 2.297362000  | -5.435354000 | -0.477888000                                  |
| H                                                   | 1.959664000  | -5.829946000 | 0.492081000                                   |
| H                                                   | 1.557660000  | -5.742999000 | -1.232954000                                  |
| H                                                   | 3.238198000  | -5.939715000 | -0.723280000                                  |
| C                                                   | -3.853378000 | -1.229641000 | 2.224272000                                   |
| H                                                   | -4.908590000 | -1.111704000 | 1.955127000                                   |
| H                                                   | -3.682615000 | -2.300791000 | 2.413055000                                   |
| H                                                   | -3.699610000 | -0.701205000 | 3.177142000                                   |
| C                                                   | -4.610367000 | 0.038475000  | -0.734599000                                  |
| H                                                   | -4.843769000 | 1.103338000  | -0.889020000                                  |
| H                                                   | -4.663109000 | -0.453917000 | -1.717197000                                  |
| H                                                   | -5.412605000 | -0.381507000 | -0.118343000                                  |
| C                                                   | 1.725256000  | 1.212971000  | -5.254685000                                  |
| H                                                   | 2.189456000  | 2.014025000  | -5.839849000                                  |
| H                                                   | 2.292434000  | 0.291693000  | -5.456252000                                  |
| H                                                   | 0.709510000  | 1.065413000  | -5.652791000                                  |
| C                                                   | 2.758497000  | 3.937311000  | -3.691160000                                  |
| H                                                   | 2.180858000  | 4.830695000  | -3.410069000                                  |
| H                                                   | 3.789478000  | 4.088185000  | -3.335611000                                  |
| H                                                   | 2.795770000  | 3.906851000  | -4.785443000                                  |
| Sum of electronic and thermal Energies=             |              |              | -2796.244675                                  |
| Sum of electronic and thermal Enthalpies=           |              |              | -2796.243731                                  |
| Sum of electronic and thermal Free Energies=        |              |              | -2796.370759                                  |
| Lowest vibration frequencies (/cm <sup>-1</sup> ) : |              |              | 12.8327            29.7854            31.5008 |

*Structures computed using the def2-TZVP basis set for all atoms.*

|    | <b>41'</b> <sub>def2TZVP</sub> |              |              |
|----|--------------------------------|--------------|--------------|
| Fe | -0.002629000                   | -0.118403000 | -0.573150000 |
| C  | 1.247503000                    | -0.032524000 | 2.208124000  |
| C  | -1.246942000                   | -0.033642000 | 2.208826000  |
| C  | 0.000450000                    | -0.059290000 | 2.832976000  |
| H  | 0.000732000                    | -0.066006000 | 3.919672000  |

|                                         |              |              |              |
|-----------------------------------------|--------------|--------------|--------------|
| C                                       | 0.090354000  | -1.668075000 | -2.107737000 |
| C                                       | -1.175022000 | -1.039569000 | -2.239123000 |
| C                                       | 1.263215000  | -0.884577000 | -2.251168000 |
| C                                       | -1.263860000 | 0.359522000  | -2.371008000 |
| H                                       | -2.082337000 | -1.632070000 | -2.173699000 |
| C                                       | 1.175033000  | 0.517385000  | -2.354718000 |
| H                                       | 2.239005000  | -1.354615000 | -2.178030000 |
| C                                       | -0.091436000 | 1.156806000  | -2.345891000 |
| H                                       | -2.239663000 | 0.835186000  | -2.388536000 |
| H                                       | 2.082421000  | 1.113036000  | -2.374703000 |
| H                                       | -0.160186000 | 2.238584000  | -2.423545000 |
| N                                       | 1.496254000  | -0.018489000 | 0.904926000  |
| N                                       | -1.496824000 | -0.020738000 | 0.905787000  |
| H                                       | 0.158977000  | -2.747615000 | -2.002926000 |
| H                                       | 2.116261000  | -0.007500000 | 2.877747000  |
| H                                       | -2.115358000 | -0.009358000 | 2.878874000  |
| C                                       | -2.878510000 | 0.058920000  | 0.574064000  |
| C                                       | -3.468160000 | 1.323186000  | 0.351870000  |
| C                                       | -3.651939000 | -1.118029000 | 0.471867000  |
| C                                       | -4.816177000 | 1.382906000  | -0.011699000 |
| C                                       | -4.996689000 | -1.008085000 | 0.103483000  |
| C                                       | -5.579108000 | 0.228438000  | -0.146101000 |
| H                                       | -5.272974000 | 2.357284000  | -0.186161000 |
| H                                       | -5.595414000 | -1.915170000 | 0.017158000  |
| H                                       | -6.626984000 | 0.293099000  | -0.436828000 |
| C                                       | 2.877846000  | 0.059066000  | 0.572348000  |
| C                                       | 3.648082000  | -1.119839000 | 0.466545000  |
| C                                       | 3.471026000  | 1.321975000  | 0.352497000  |
| C                                       | 4.992862000  | -1.013216000 | 0.097614000  |
| C                                       | 4.818699000  | 1.378377000  | -0.013275000 |
| C                                       | 5.578317000  | 0.222155000  | -0.150735000 |
| H                                       | 5.588696000  | -1.921927000 | 0.008527000  |
| H                                       | 5.277959000  | 2.351745000  | -0.186969000 |
| H                                       | 6.625925000  | 0.284463000  | -0.442927000 |
| C                                       | -2.686950000 | 2.592062000  | 0.538939000  |
| H                                       | -2.537534000 | 2.812351000  | 1.604357000  |
| H                                       | -1.688595000 | 2.527212000  | 0.095897000  |
| H                                       | -3.214007000 | 3.443687000  | 0.096847000  |
| C                                       | -3.076454000 | -2.469056000 | 0.790369000  |
| H                                       | -2.036604000 | -2.562030000 | 0.465111000  |
| H                                       | -3.081655000 | -2.655196000 | 1.873075000  |
| H                                       | -3.666116000 | -3.264387000 | 0.322403000  |
| C                                       | 3.066707000  | -2.469822000 | 0.777970000  |
| H                                       | 3.054391000  | -2.655354000 | 1.860642000  |
| H                                       | 2.031699000  | -2.561151000 | 0.436985000  |
| H                                       | 3.661953000  | -3.266165000 | 0.319033000  |
| C                                       | 2.694697000  | 2.593152000  | 0.545129000  |
| H                                       | 1.691848000  | 2.530114000  | 0.112191000  |
| H                                       | 2.556834000  | 2.815402000  | 1.611730000  |
| H                                       | 3.219597000  | 3.442895000  | 0.096799000  |
| Sum of electronic and thermal Energies= |              |              | -2341.873080 |

Sum of electronic and thermal Enthalpies= -2341.872136  
 Sum of electronic and thermal Free Energies= -2341.965118  
 Lowest vibration frequencies (/cm<sup>-1</sup>) : 2.6641 41.0434 42.1015

|    | <sup>2</sup> 1' <sub>defTZVP</sub> |              |              |
|----|------------------------------------|--------------|--------------|
| Fe | -0.000985000                       | -0.110764000 | -0.559077000 |
| C  | 1.224500000                        | -0.017959000 | 2.128065000  |
| C  | -1.221965000                       | -0.017410000 | 2.130411000  |
| C  | 0.001901000                        | -0.033994000 | 2.787666000  |
| H  | 0.002966000                        | -0.028646000 | 3.873335000  |
| C  | 0.065651000                        | -1.652903000 | -1.980194000 |
| C  | -1.179433000                       | -0.992313000 | -2.050259000 |
| C  | 1.240848000                        | -0.873030000 | -2.062145000 |
| C  | -1.245546000                       | 0.416667000  | -2.159825000 |
| H  | -2.102383000                       | -1.553910000 | -1.942066000 |
| C  | 1.175286000                        | 0.535815000  | -2.170335000 |
| H  | 2.212942000                        | -1.344782000 | -1.956482000 |
| C  | -0.069876000                       | 1.198603000  | -2.201551000 |
| H  | -2.217588000                       | 0.899433000  | -2.128480000 |
| H  | 2.098363000                        | 1.107848000  | -2.152838000 |
| H  | -0.123918000                       | 2.283730000  | -2.263502000 |
| N  | 1.417518000                        | -0.023616000 | 0.814202000  |
| N  | -1.417170000                       | -0.023538000 | 0.816927000  |
| H  | 0.119621000                        | -2.734173000 | -1.869400000 |
| H  | 2.123401000                        | 0.012206000  | 2.752498000  |
| H  | -2.119729000                       | 0.013266000  | 2.756432000  |
| C  | -2.807907000                       | 0.044729000  | 0.479973000  |
| C  | -3.412336000                       | 1.305563000  | 0.285175000  |
| C  | -3.575678000                       | -1.136611000 | 0.407379000  |
| C  | -4.768021000                       | 1.355731000  | -0.051203000 |
| C  | -4.928837000                       | -1.036376000 | 0.065971000  |
| C  | -5.523775000                       | 0.195522000  | -0.174224000 |
| H  | -5.236168000                       | 2.327107000  | -0.211485000 |
| H  | -5.523677000                       | -1.947419000 | -0.003291000 |
| H  | -6.577331000                       | 0.252660000  | -0.445556000 |
| C  | 2.807781000                        | 0.048294000  | 0.475835000  |
| C  | 3.576702000                        | -1.132376000 | 0.399114000  |
| C  | 3.411164000                        | 1.310178000  | 0.287032000  |
| C  | 4.930655000                        | -1.029937000 | 0.062556000  |
| C  | 4.767767000                        | 1.362484000  | -0.046410000 |
| C  | 5.525037000                        | 0.203640000  | -0.171229000 |
| H  | 5.526344000                        | -1.940246000 | -0.008642000 |
| H  | 5.235622000                        | 2.334840000  | -0.201653000 |
| H  | 6.579420000                        | 0.262876000  | -0.438858000 |
| C  | -2.643011000                       | 2.580768000  | 0.476669000  |
| H  | -2.541953000                       | 2.821256000  | 1.543793000  |
| H  | -1.627353000                       | 2.507905000  | 0.078279000  |
| H  | -3.154778000                       | 3.422021000  | -0.001942000 |
| C  | -2.992647000                       | -2.481446000 | 0.738588000  |
| H  | -1.934612000                       | -2.549423000 | 0.473991000  |
| H  | -3.060879000                       | -2.679844000 | 1.817335000  |

|                                                     |              |              |                                               |
|-----------------------------------------------------|--------------|--------------|-----------------------------------------------|
| H                                                   | -3.540058000 | -3.281773000 | 0.229264000                                   |
| C                                                   | 2.990894000  | -2.478652000 | 0.718151000                                   |
| H                                                   | 3.031726000  | -2.676106000 | 1.798390000                                   |
| H                                                   | 1.939840000  | -2.549792000 | 0.427485000                                   |
| H                                                   | 3.553047000  | -3.277424000 | 0.222849000                                   |
| C                                                   | 2.642578000  | 2.584847000  | 0.486773000                                   |
| H                                                   | 1.622639000  | 2.512010000  | 0.099573000                                   |
| H                                                   | 2.553854000  | 2.824864000  | 1.555157000                                   |
| H                                                   | 3.148763000  | 3.426712000  | 0.003230000                                   |
| Sum of electronic and thermal Energies=             |              |              | -2341.886583                                  |
| Sum of electronic and thermal Enthalpies=           |              |              | -2341.885639                                  |
| Sum of electronic and thermal Free Energies=        |              |              | -2341.971362                                  |
| Lowest vibration frequencies (/cm <sup>-1</sup> ) : |              |              | 16.7020            46.4039            50.6926 |

**42'** def2TZVP

|    |              |              |              |
|----|--------------|--------------|--------------|
| Fe | 0.034712000  | -0.850737000 | -0.446702000 |
| C  | -1.269853000 | -3.559026000 | -0.067966000 |
| C  | 1.176179000  | -3.671977000 | -0.509581000 |
| C  | -0.059686000 | -4.241758000 | -0.199143000 |
| H  | -0.091643000 | -5.321309000 | -0.082256000 |
| N  | -1.488722000 | -2.255003000 | -0.172835000 |
| N  | 1.413450000  | -2.385756000 | -0.682440000 |
| H  | -2.147184000 | -4.184918000 | 0.135429000  |
| H  | 2.022205000  | -4.359581000 | -0.629309000 |
| C  | 2.735421000  | -2.003895000 | -1.050802000 |
| C  | 3.075648000  | -1.913633000 | -2.421310000 |
| C  | 3.689945000  | -1.698446000 | -0.054107000 |
| C  | 4.342273000  | -1.436689000 | -2.766402000 |
| C  | 4.944622000  | -1.227162000 | -0.453132000 |
| C  | 5.268755000  | -1.077503000 | -1.794825000 |
| H  | 4.603524000  | -1.353095000 | -3.821257000 |
| H  | 5.680670000  | -0.979782000 | 0.311990000  |
| H  | 6.247515000  | -0.696831000 | -2.083915000 |
| C  | -2.857630000 | -1.876943000 | -0.015657000 |
| C  | -3.378280000 | -1.642149000 | 1.275051000  |
| C  | -3.677168000 | -1.750355000 | -1.157846000 |
| C  | -4.715519000 | -1.252285000 | 1.395134000  |
| C  | -5.007634000 | -1.358869000 | -0.985045000 |
| C  | -5.527913000 | -1.104925000 | 0.278052000  |
| H  | -5.121102000 | -1.063308000 | 2.388904000  |
| H  | -5.644235000 | -1.256145000 | -1.863675000 |
| H  | -6.566240000 | -0.796046000 | 0.391541000  |
| C  | 2.146540000  | -2.378261000 | -3.507125000 |
| H  | 1.094607000  | -2.297057000 | -3.227494000 |
| H  | 2.308531000  | -1.811997000 | -4.430031000 |
| H  | 2.329924000  | -3.436790000 | -3.740019000 |
| C  | 3.435086000  | -1.929086000 | 1.409488000  |
| H  | 2.376850000  | -2.054018000 | 1.641123000  |
| H  | 3.947748000  | -2.842487000 | 1.742028000  |
| H  | 3.829082000  | -1.104272000 | 2.013306000  |
| C  | -2.541246000 | -1.818873000 | 2.508960000  |

|                                                     |              |              |                                               |
|-----------------------------------------------------|--------------|--------------|-----------------------------------------------|
| H                                                   | -2.331044000 | -2.877672000 | 2.708548000                                   |
| H                                                   | -1.570399000 | -1.321531000 | 2.420000000                                   |
| H                                                   | -3.055473000 | -1.413866000 | 3.385826000                                   |
| C                                                   | -3.159359000 | -2.048525000 | -2.534836000                                  |
| H                                                   | -2.248260000 | -1.484404000 | -2.759241000                                  |
| H                                                   | -2.904334000 | -3.109460000 | -2.651296000                                  |
| H                                                   | -3.909615000 | -1.800977000 | -3.291858000                                  |
| C                                                   | 0.692618000  | 0.163867000  | 0.988655000                                   |
| C                                                   | 0.225142000  | 0.150620000  | -2.024218000                                  |
| C                                                   | -1.443674000 | 0.614120000  | -0.226436000                                  |
| O                                                   | 1.058211000  | 0.829728000  | 1.855567000                                   |
| O                                                   | 0.329090000  | 0.809582000  | -2.963868000                                  |
| O                                                   | -1.781094000 | 1.715312000  | -0.184127000                                  |
| Sum of electronic and thermal Energies=             |              |              | -2449.678708                                  |
| Sum of electronic and thermal Enthalpies=           |              |              | -2449.677764                                  |
| Sum of electronic and thermal Free Energies=        |              |              | -2449.775437                                  |
| Lowest vibration frequencies (/cm <sup>-1</sup> ) : |              |              | 12.1687            27.3835            42.4242 |

<sup>2</sup><sub>defTZVP</sub>

|    |              |              |              |
|----|--------------|--------------|--------------|
| Fe | -0.131380000 | -0.874956000 | -0.963401000 |
| C  | -1.354100000 | -3.544557000 | -0.589814000 |
| C  | 1.063930000  | -3.581893000 | -0.998956000 |
| C  | -0.175545000 | -4.210698000 | -0.915537000 |
| H  | -0.202399000 | -5.294201000 | -0.975299000 |
| N  | -1.519473000 | -2.237368000 | -0.478403000 |
| N  | 1.296548000  | -2.280825000 | -0.952745000 |
| H  | -2.229137000 | -4.163555000 | -0.365139000 |
| H  | 1.944953000  | -4.228161000 | -1.073202000 |
| C  | 2.690995000  | -1.939265000 | -0.928230000 |
| C  | 3.426053000  | -1.848054000 | -2.128312000 |
| C  | 3.316116000  | -1.731181000 | 0.321046000  |
| C  | 4.782961000  | -1.514215000 | -2.050449000 |
| C  | 4.671947000  | -1.397341000 | 0.342413000  |
| C  | 5.405143000  | -1.281855000 | -0.832245000 |
| H  | 5.357178000  | -1.441347000 | -2.973888000 |
| H  | 5.158387000  | -1.235203000 | 1.303869000  |
| H  | 6.462139000  | -1.021482000 | -0.796551000 |
| C  | -2.817114000 | -1.851801000 | -0.000095000 |
| C  | -2.988535000 | -1.631203000 | 1.384202000  |
| C  | -3.902557000 | -1.729436000 | -0.891935000 |
| C  | -4.249263000 | -1.252041000 | 1.849897000  |
| C  | -5.146527000 | -1.353461000 | -0.372276000 |
| C  | -5.324472000 | -1.107666000 | 0.981756000  |
| H  | -4.385450000 | -1.076997000 | 2.916718000  |
| H  | -5.990686000 | -1.256407000 | -1.054701000 |
| H  | -6.301610000 | -0.812963000 | 1.362106000  |
| C  | 2.815622000  | -2.076779000 | -3.482361000 |
| H  | 1.996904000  | -2.799395000 | -3.465354000 |
| H  | 2.414114000  | -1.143232000 | -3.896703000 |
| H  | 3.574080000  | -2.438909000 | -4.184123000 |
| C  | 2.567385000  | -1.870725000 | 1.614534000  |

|                                                     |              |              |                                               |
|-----------------------------------------------------|--------------|--------------|-----------------------------------------------|
| H                                                   | 1.737602000  | -1.157925000 | 1.682049000                                   |
| H                                                   | 2.132247000  | -2.870066000 | 1.730928000                                   |
| H                                                   | 3.233246000  | -1.692367000 | 2.464049000                                   |
| C                                                   | -1.859794000 | -1.811950000 | 2.356544000                                   |
| H                                                   | -1.534807000 | -2.858457000 | 2.411089000                                   |
| H                                                   | -0.979743000 | -1.226707000 | 2.070112000                                   |
| H                                                   | -2.163545000 | -1.503381000 | 3.361244000                                   |
| C                                                   | -3.780783000 | -1.966086000 | -2.370859000                                  |
| H                                                   | -3.514879000 | -1.040476000 | -2.897097000                                  |
| H                                                   | -3.022192000 | -2.709602000 | -2.624530000                                  |
| H                                                   | -4.738168000 | -2.303888000 | -2.781025000                                  |
| C                                                   | 1.067998000  | 0.405938000  | -0.892345000                                  |
| C                                                   | -0.428514000 | -0.638977000 | -2.718003000                                  |
| C                                                   | -1.197456000 | 0.441260000  | -0.497487000                                  |
| O                                                   | 1.770072000  | 1.325817000  | -0.883012000                                  |
| O                                                   | -0.611008000 | -0.312755000 | -3.812245000                                  |
| O                                                   | -1.825441000 | 1.382622000  | -0.255382000                                  |
| Sum of electronic and thermal Energies=             |              |              | -2449.735443                                  |
| Sum of electronic and thermal Enthalpies=           |              |              | -2449.734499                                  |
| Sum of electronic and thermal Free Energies=        |              |              | -2449.825967                                  |
| Lowest vibration frequencies (/cm <sup>-1</sup> ) : |              |              | 22.7327            32.1036            41.5226 |

<sup>4</sup>Me,def2TZVP

|    |              |              |              |
|----|--------------|--------------|--------------|
| C  | 3.811816000  | -1.736686000 | 0.366053000  |
| C  | 2.753492000  | -0.846856000 | 0.573463000  |
| C  | 1.685183000  | -0.699160000 | -0.333952000 |
| C  | 1.752615000  | -1.529538000 | -1.471726000 |
| C  | 2.800686000  | -2.422559000 | -1.700845000 |
| C  | 3.843143000  | -2.531065000 | -0.779088000 |
| H  | 4.615945000  | -1.813716000 | 1.103208000  |
| H  | 2.769942000  | -0.247903000 | 1.489768000  |
| H  | 0.947229000  | -1.488750000 | -2.210792000 |
| H  | 2.804385000  | -3.043893000 | -2.600468000 |
| H  | 4.664202000  | -3.230063000 | -0.947951000 |
| Fe | 0.113883000  | 0.601846000  | -0.086318000 |
| C  | 0.765711000  | 2.360065000  | -0.888737000 |
| C  | -0.589042000 | 2.249028000  | -1.372217000 |
| C  | 0.898369000  | 2.418246000  | 0.528035000  |
| C  | -1.669591000 | 2.750963000  | -0.566731000 |
| C  | -0.256564000 | 2.420466000  | 1.357995000  |
| H  | 1.890885000  | 2.395189000  | 0.977375000  |
| C  | -1.513479000 | 2.811883000  | 0.796521000  |
| H  | -2.632205000 | 2.974290000  | -1.027754000 |
| H  | -0.127491000 | 2.385063000  | 2.438581000  |
| H  | -2.347649000 | 3.070331000  | 1.448447000  |
| H  | -0.734103000 | 2.148270000  | -2.447822000 |
| C  | -1.521187000 | -0.576175000 | 0.116983000  |
| C  | -2.698029000 | -0.572368000 | -0.660835000 |
| C  | -1.482174000 | -1.575809000 | 1.116599000  |
| C  | -3.746669000 | -1.476512000 | -0.465431000 |
| H  | -2.809517000 | 0.167676000  | -1.455279000 |

|                                                     |              |              |              |
|-----------------------------------------------------|--------------|--------------|--------------|
| C                                                   | -2.523953000 | -2.478190000 | 1.336944000  |
| H                                                   | -0.596742000 | -1.664012000 | 1.751148000  |
| C                                                   | -3.670786000 | -2.436174000 | 0.542371000  |
| H                                                   | -4.631529000 | -1.430910000 | -1.106711000 |
| H                                                   | -2.439895000 | -3.223804000 | 2.132285000  |
| H                                                   | -4.487372000 | -3.142509000 | 0.703418000  |
| C                                                   | 1.929839000  | 2.507998000  | -1.820272000 |
| H                                                   | 2.065261000  | 3.561797000  | -2.116100000 |
| H                                                   | 2.862117000  | 2.164197000  | -1.358386000 |
| H                                                   | 1.781605000  | 1.925627000  | -2.737938000 |
| Sum of electronic and thermal Energies=             |              | -1998.470721 |              |
| Sum of electronic and thermal Enthalpies=           |              | -1998.469777 |              |
| Sum of electronic and thermal Free Energies=        |              | -1998.543141 |              |
| Lowest vibration frequencies (/cm <sup>-1</sup> ) : | 23.1862      | 31.4424      | 36.9920      |

<sup>24</sup>Me,def2TZVP

|    |              |              |              |
|----|--------------|--------------|--------------|
| C  | 3.166566000  | -1.834290000 | 0.733370000  |
| C  | 2.142305000  | -0.895208000 | 0.869457000  |
| C  | 1.325870000  | -0.484596000 | -0.208592000 |
| C  | 1.611772000  | -1.120257000 | -1.437849000 |
| C  | 2.636023000  | -2.055376000 | -1.590818000 |
| C  | 3.429894000  | -2.422983000 | -0.503712000 |
| H  | 3.766171000  | -2.110254000 | 1.605461000  |
| H  | 1.976548000  | -0.465605000 | 1.860151000  |
| H  | 1.007670000  | -0.883902000 | -2.316174000 |
| H  | 2.811119000  | -2.509928000 | -2.570023000 |
| H  | 4.228984000  | -3.157614000 | -0.616253000 |
| Fe | -0.046745000 | 0.903933000  | -0.021405000 |
| C  | 0.729225000  | 2.497266000  | -1.130669000 |
| C  | -0.690372000 | 2.457676000  | -1.223200000 |
| C  | 1.319692000  | 2.473462000  | 0.163411000  |
| C  | -1.485841000 | 2.411462000  | -0.050223000 |
| C  | 0.532708000  | 2.346350000  | 1.337501000  |
| H  | 2.403069000  | 2.381629000  | 0.242119000  |
| C  | -0.880045000 | 2.325809000  | 1.228986000  |
| H  | -2.561872000 | 2.268758000  | -0.142393000 |
| H  | 1.016192000  | 2.245413000  | 2.309909000  |
| H  | -1.498425000 | 2.165255000  | 2.112110000  |
| H  | -1.170704000 | 2.443345000  | -2.202760000 |
| C  | -1.376905000 | -0.526278000 | 0.108064000  |
| C  | -2.136167000 | -0.962102000 | -1.000923000 |
| C  | -1.705554000 | -1.152673000 | 1.331210000  |
| C  | -3.148515000 | -1.918102000 | -0.899953000 |
| H  | -1.936885000 | -0.537311000 | -1.987518000 |
| C  | -2.717720000 | -2.106375000 | 1.447927000  |
| H  | -1.150169000 | -0.888056000 | 2.233848000  |
| C  | -3.454982000 | -2.499954000 | 0.330317000  |
| H  | -3.705115000 | -2.212346000 | -1.794276000 |
| H  | -2.929525000 | -2.552978000 | 2.423525000  |
| H  | -4.245674000 | -3.247254000 | 0.415104000  |
| C  | 1.584490000  | 2.574205000  | -2.362488000 |

|                                                     |             |             |              |
|-----------------------------------------------------|-------------|-------------|--------------|
| H                                                   | 1.803154000 | 3.621228000 | -2.628098000 |
| H                                                   | 2.541485000 | 2.061012000 | -2.217611000 |
| H                                                   | 1.086608000 | 2.112922000 | -3.223692000 |
| Sum of electronic and thermal Energies=             |             |             | -1998.512741 |
| Sum of electronic and thermal Enthalpies=           |             |             | -1998.511797 |
| Sum of electronic and thermal Free Energies=        |             |             | -1998.580370 |
| Lowest vibration frequencies (/cm <sup>-1</sup> ) : | 30.8272     | 35.2477     | 40.3843      |

Comparison between the doublet-quartet gaps computed using def2-TZVP basis set on Fe and 6-31G\* on other atoms (level A) and using def2-TZVP basis set on all atoms (level B):

|                       | Level A                              | Level B                              |
|-----------------------|--------------------------------------|--------------------------------------|
| <b>1'</b>             | $G_Q-G_D = 5.7$<br>$E_Q-E_D = 8.8$   | $G_Q-G_D = 3.9$<br>$E_Q-E_D = 8.4$   |
| <b>2'</b>             | $G_Q-G_D = 32.5$<br>$E_Q-E_D = 35.6$ | $G_Q-G_D = 31.7$<br>$E_Q-E_D = 35.6$ |
| <b>4<sub>Me</sub></b> | $G_Q-G_D = 22.8$<br>$E_Q-E_D = 25.6$ | $G_Q-G_D = 23.6$<br>$E_Q-E_D = 26.4$ |

**Table S1.** Computed doublet-quartet gaps (in kcal.mol<sup>-1</sup>) for complexes **1'**, **2'** and **4<sub>Me</sub>**.

Optimization of **23** and **43<sub>Td</sub>** at the OPBE level (without dispersion) :

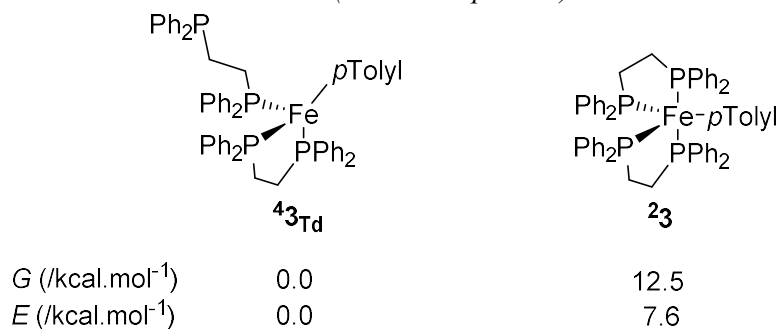

**Scheme S1.** Comparison between the thermodynamic features of **43<sub>Td</sub>** and **23**.



### 3) Comparison between metric parameters of experimental and computed structures

| Complex                                                                                                                                                                                               | Selected metric parameters <sup>[a]</sup>                                                                                                                                                                                                                                                                                                                                        | Experimental value                                                                                | Computed Value <sup>[b]</sup>                                                                     | % Error <sup>[b]</sup>                                   |
|-------------------------------------------------------------------------------------------------------------------------------------------------------------------------------------------------------|----------------------------------------------------------------------------------------------------------------------------------------------------------------------------------------------------------------------------------------------------------------------------------------------------------------------------------------------------------------------------------|---------------------------------------------------------------------------------------------------|---------------------------------------------------------------------------------------------------|----------------------------------------------------------|
| 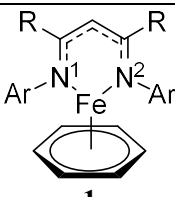 <p style="text-align: center;"><b>1</b></p>                                                                         | N <sup>1</sup> —Fe<br>N <sup>2</sup> —Fe<br>N <sup>1</sup> —Fe—N <sup>2</sup><br>Average Fe—C <sub>arene</sub>                                                                                                                                                                                                                                                                   | 1.97<br>1.98<br>92.2<br>2.14                                                                      | 2.02<br>2.03<br>92.9<br>2.11                                                                      | 3<br>3<br>1<br>1                                         |
|  <p style="text-align: center;"><b>2</b></p>                                                                         | N <sup>1</sup> —Fe<br>N <sup>2</sup> —Fe<br>C <sup>1</sup> —Fe<br>C <sup>2</sup> —Fe<br>C <sup>3</sup> —Fe<br>N <sup>1</sup> —Fe—N <sup>2</sup><br>N <sup>1</sup> —Fe—C <sup>3</sup><br>N <sup>2</sup> —Fe—C <sup>1</sup><br>O <sup>1</sup> —C <sup>1</sup> —Fe<br>O <sup>2</sup> —C <sup>2</sup> —Fe<br>O <sup>2</sup> —C <sup>3</sup> —Fe<br>C <sup>4</sup> —Fe—C <sup>2</sup> | 1.98<br>1.98<br>1.80<br>1.87<br>1.80<br>91.0<br>163.2<br>163.2<br>174.9<br>179.5<br>174.9<br>90.9 | 2.02<br>2.02<br>1.76<br>1.79<br>1.76<br>93.1<br>163.1<br>162.6<br>172.9<br>171.7<br>172.9<br>94.7 | 2<br>2<br>2<br>4<br>2<br>2<br>0<br>0<br>1<br>4<br>1<br>4 |
|  <p style="text-align: center;"><b>3</b></p>                                                                        | P <sup>1</sup> —Fe<br>P <sup>2</sup> —Fe<br>P <sup>3</sup> —Fe<br>P <sup>4</sup> —Fe<br>C—Fe<br>P <sup>3</sup> —Fe—P <sup>4</sup><br>P <sup>3</sup> —Fe—C<br>P <sup>4</sup> —Fe—C<br>P <sup>1</sup> —Fe—P <sup>2</sup>                                                                                                                                                           | 2.22<br>2.24<br>2.23<br>2.25<br>2.05<br>104.7<br>133.5<br>121.8<br>178.3                          | 2.26<br>2.25<br>2.31<br>2.24<br>2.02<br>97.6<br>146.4<br>115.8<br>173.2                           | 2<br>1<br>4<br>1<br>1<br>7<br>10<br>5<br>3               |
|  <p style="text-align: center;"><b>4<sub>Ph</sub></b></p>                                                          | Ph <sup>1</sup> —Fe<br>Ph <sup>2</sup> —Fe<br>Average Fe—C <sub>arene</sub><br>Ph <sup>1</sup> —Fe—Ph <sup>2</sup>                                                                                                                                                                                                                                                               | 1.98<br>1.97<br>2.11<br>93.1                                                                      | 1.97<br>1.96<br>2.08<br>88.6                                                                      | 1<br>1<br>1<br>4                                         |
|  <p style="text-align: center;"><b>5</b></p> <p style="text-align: center;">( ◯ = C<sub>6</sub>H<sub>4</sub> )</p> | N <sup>1</sup> —Fe<br>N <sup>2</sup> —Fe<br>C <sub>a</sub> C <sub>a'</sub> —Fe<br>C <sub>b</sub> C <sub>b'</sub> —Fe<br>N <sup>1</sup> —Fe—N <sup>2</sup>                                                                                                                                                                                                                        | 1.90<br>1.95<br>1.92<br>1.93<br>79.2                                                              | 1.85<br>1.85<br>1.87<br>1.87<br>84.9                                                              | 3<br>5<br>3<br>3<br>7                                    |
|  <p style="text-align: center;"><b>6</b></p>                                                                       | C <sup>1</sup> —Fe<br>C <sup>2</sup> —Fe<br>C <sup>3</sup> —Fe<br>C <sup>4</sup> —Fe<br>C <sup>2</sup> —Fe—C <sup>1</sup><br>C <sup>3</sup> —Fe—C <sup>2</sup><br>C <sup>4</sup> —Fe—C <sup>1</sup><br>C <sup>4</sup> —Fe—C <sup>3</sup>                                                                                                                                         | 2.00<br>2.00<br>2.00<br>1.98<br>89.6<br>89.8<br>89.5<br>91.1                                      | 2.05<br>2.05<br>2.05<br>2.05<br>90.0<br>90.0<br>89.7<br>90.2                                      | 3<br>3<br>3<br>4<br>1<br>1<br>1<br>1                     |

|                                                                                                                             |                                                                                                                                                                                                                                                                                                                                                                  |                                                                                                                     |                                                                                                                   |                                                                            |
|-----------------------------------------------------------------------------------------------------------------------------|------------------------------------------------------------------------------------------------------------------------------------------------------------------------------------------------------------------------------------------------------------------------------------------------------------------------------------------------------------------|---------------------------------------------------------------------------------------------------------------------|-------------------------------------------------------------------------------------------------------------------|----------------------------------------------------------------------------|
| 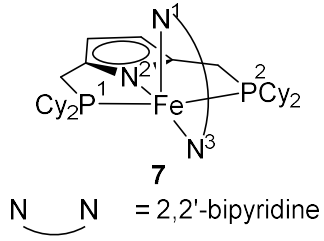 <p><b>7</b><br/>N—N = 2,2'-bipyridine</p> | <p>N<sup>1</sup>—Fe<br/>N<sup>2</sup>—Fe<br/>N<sup>3</sup>—Fe<br/>P<sup>1</sup>—Fe<br/>P<sup>2</sup>—Fe<br/>N<sup>2</sup>—Fe—N<sup>3</sup><br/>N<sup>2</sup>—Fe—N<sup>1</sup><br/>N<sup>1</sup>—Fe—N<sup>3</sup><br/>P<sup>1</sup>—Fe—N<sup>1</sup><br/>P<sup>2</sup>—Fe—N<sup>1</sup><br/>P<sup>1</sup>—Fe—N<sup>3</sup><br/>P<sup>2</sup>—Fe—N<sup>3</sup></p> | <p>1.96<br/>1.97<br/>1.91<br/>2.28<br/>2.32<br/>174.4<br/>92.8<br/>81.6<br/>105.0<br/>105.1<br/>100.4<br/>102.4</p> | <p>1.93<br/>1.95<br/>1.88<br/>2.31<br/>2.31<br/>179.6<br/>98.1<br/>82.2<br/>101.6<br/>101.3<br/>98.4<br/>98.9</p> | <p>2<br/>1<br/>2<br/>1<br/>1<br/>3<br/>6<br/>1<br/>3<br/>4<br/>2<br/>3</p> |
|  <p><b>8</b></p>                           | <p>C<sup>1</sup>—Fe<br/>Average Fe—C<sub>arene</sub></p>                                                                                                                                                                                                                                                                                                         | <p>2.03<br/>2.16</p>                                                                                                | <p>2.06<br/>2.15</p>                                                                                              | <p>1<br/>1</p>                                                             |
|  <p><b>9</b></p>                          | <p>Fe—P<br/>Fe—N<sup>1</sup><br/>Fe—N<sup>2</sup><br/>N<sup>1</sup>—Fe—N<sup>2</sup><br/>N<sup>1</sup>—Fe—P<br/>N<sup>2</sup>—Fe—P<br/>C<sup>1</sup>—Fe—P</p>                                                                                                                                                                                                    | <p>2.23<br/>1.95<br/>1.96<br/>98.1<br/>127.3<br/>125.3</p>                                                          | <p>2.29<br/>2.00<br/>2.00<br/>100.7<br/>126.4<br/>126.3<br/>153.7</p>                                             | <p>3<br/>3<br/>2<br/>3<br/>1<br/>1</p>                                     |
|  <p><b>10</b></p>                        | <p>Fe—N<sup>1</sup><br/>Fe—N<sup>2</sup><br/>N<sup>1</sup>—Fe—N<sup>2</sup></p>                                                                                                                                                                                                                                                                                  | <p>1.92<br/>1.92<br/>180</p>                                                                                        | <p>1.91<br/>1.92<br/>179.3</p>                                                                                    | <p>1<br/>0<br/>4</p>                                                       |
|  <p><b>11</b></p>                        | <p>Fe—C<sub>NHC'</sub><br/>Fe—N<br/>C<sub>NHC'</sub>—Fe—N<br/>Fe—N—C<sub>DIPP</sub><br/>Fe—N—C<sub>TMS</sub></p>                                                                                                                                                                                                                                                 | <p>2.01<br/>1.89<br/>176.9<br/>115.8<br/>118.1</p>                                                                  | <p>1.96<br/>1.91<br/>173.4<br/>123.2<br/>114.8</p>                                                                | <p>2<br/>1<br/>2<br/>6<br/>3</p>                                           |
|  <p><b>12</b></p>                        | <p>C<sup>1</sup>—Fe<br/>C<sup>2</sup>—Fe<br/>C<sup>3</sup>—Fe<br/>C<sup>4</sup>—Fe<br/>C<sup>2</sup>—Fe—C<sup>1</sup><br/>C<sup>3</sup>—Fe—C<sup>1</sup><br/>C<sup>3</sup>—Fe—C<sup>2</sup><br/>C<sup>4</sup>—Fe—C<sup>1</sup><br/>C<sup>4</sup>—Fe—C<sup>2</sup><br/>C<sup>4</sup>—Fe—C<sup>3</sup></p>                                                         | <p>2.06<br/>2.05<br/>2.04<br/>2.04<br/>112.4<br/>117.1<br/>98.9<br/>101.4<br/>116.0<br/>111.8</p>                   | <p>2.07<br/>2.07<br/>2.07<br/>2.07<br/>116.0<br/>115.3<br/>97.8<br/>97.6<br/>115.6<br/>115.7</p>                  | <p>1<br/>1<br/>1<br/>1<br/>3<br/>2<br/>1<br/>4<br/>1<br/>3</p>             |

<sup>[a]</sup> bonds in Å, angles in degrees; <sup>[b]</sup> for non-truncated computed complexes.

**Table S2.** Comparison between the computed metric parameters of benchmarked complexes and experimental data.

#### 4) Analysis of $\alpha/\beta$ population for complexes $^24_{Me}$ and $^21'$ upon arene decoordination

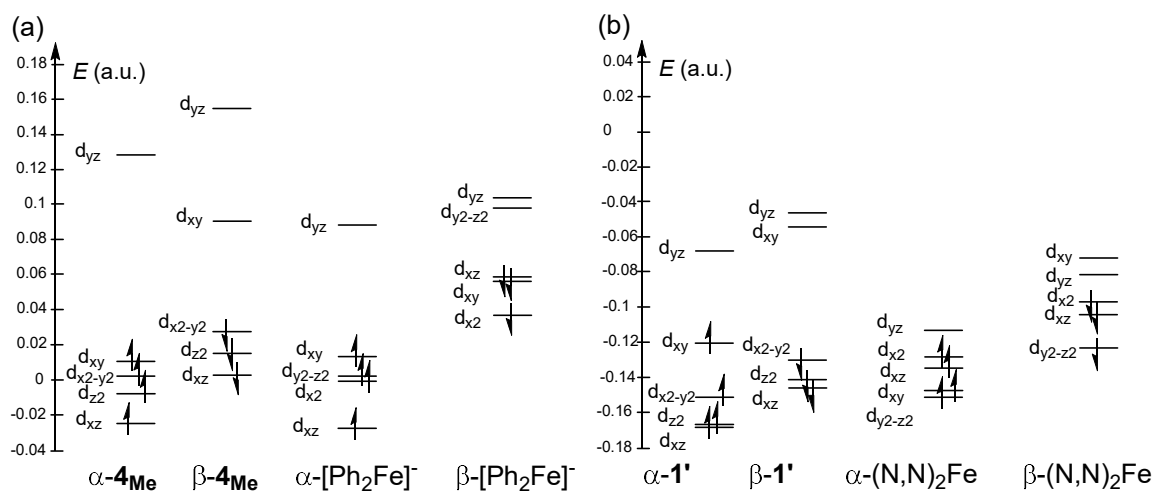

**Figure S1.** Evolution of the alpha and beta d-block MOs span of complexes  $^24_{Me}$  (a) and  $^21'$  (b) upon decoordination of the  $\eta^6$ -arene ligand.

## 5) Computation of Mössbauer isomer shifts

Mössbauer parameters can be evaluated easily using DFT techniques, which allow the computation of the electronic density at the  $^{57}\text{Fe}$  nucleus, noted  $\rho_0$  (unit:  $\text{e}\cdot\text{a}_0^{-3}$ , where  $\text{a}_0$  is Bohr radius). A reliable estimation of the isomer shift ( $\delta$ ) can be obtained with a linear extrapolation from  $\rho_0$ .<sup>4</sup> All calculations were performed with ORCA 3.0.3 software,<sup>5</sup> using the OPBE functional in gas phase, associated with the TZVP basis set<sup>6a</sup> for all atoms except Fe which was treated with the CP(PPP) enlarged basis set.<sup>6b,c</sup> This choice has been motivated since it allows a good compromise between accuracy and computational time. It has indeed been demonstrated that the use of CP(PPP) basis set on iron allowed more accurate linear fit between  $\rho_0$  and  $\delta$  for a very modest additional computational cost.<sup>4</sup>

*Computed isomer shifts:*

| Complex                                                                          | $\rho_0$ ( $\text{e}\cdot\text{a}_0^{-3}$ ) | $\delta_{\text{exp}}$ ( $\text{mm}\cdot\text{s}^{-1}$ ) [ref] |
|----------------------------------------------------------------------------------|---------------------------------------------|---------------------------------------------------------------|
| <b>3</b>                                                                         | 11808.57503                                 | 0.32 [7a]                                                     |
| <b>4<sub>Me</sub></b>                                                            | 11808.84611                                 | 0.28 [7b]                                                     |
| <b>5</b>                                                                         | 11809.07564                                 | 0.20 [7c]                                                     |
| <b>6</b>                                                                         | 11808.24062                                 | 0.36 [7d]                                                     |
| <b>10</b>                                                                        | 11808.76521                                 | 0.36 [7e]                                                     |
| <b>11</b>                                                                        | 11808.39345                                 | 0.39 [7f]                                                     |
| <b>12</b>                                                                        | 11808.19616                                 | 0.57 [7d]                                                     |
| <b>[FeCl<sub>4</sub>]<sup>2-</sup></b><br>( <i>S</i> = 2, <i>T<sub>d</sub></i> ) | 11806.74303                                 | 1.00 [7g]                                                     |

**Table S3.** Computed electronic densities and experimental isomer shifts of selected complexes.

The calibration curve  $\rho_{0,\text{calc}} = f(\delta_{\text{exp}})$  is given thereafter.

The values of computed isomer shifts ( $\delta_{\text{calc}}$ ) reported in the article (Table 1) have been calculated using the calibration curve equation:

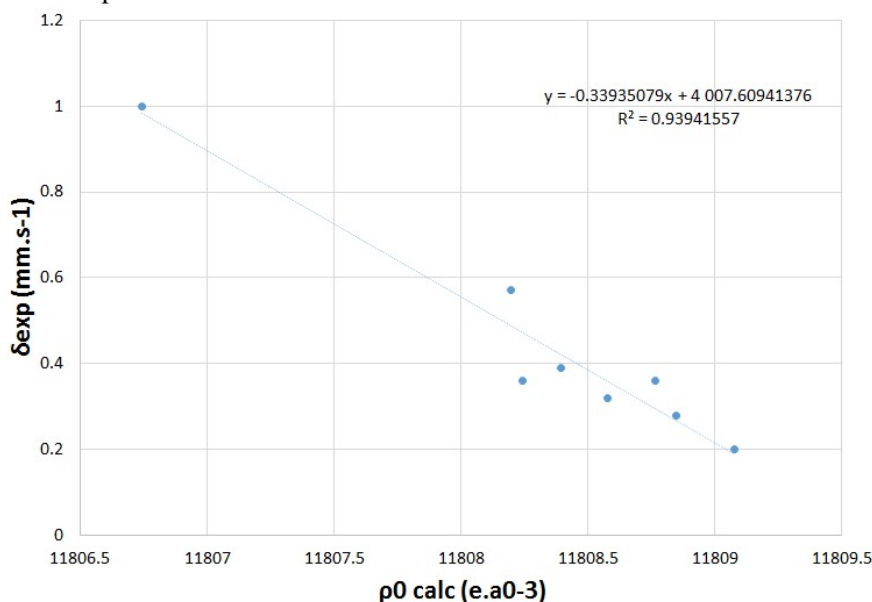

$$\delta_{\text{calc}} = -0.3393\rho_0 + 4007.6094 \text{ (mm}\cdot\text{s}^{-1}\text{)}$$

**Figure S2.** Calibration curve  $\rho_{0,\text{calc}} = f(\delta_{\text{exp}})$ .

## References

- 1 a) Gaussian 09, Revision D.01, M. J. Frisch *et al.*, Gaussian, Inc., Wallingford CT, 2013; b) Gaussian 09, Revision E.01, M. J. Frisch *et al.*, Gaussian, Inc., Wallingford CT, 2013.
- 2 F. Weigend and R. J. Ahlrichs, *Phys. Chem. Chem. Phys.*, 2005, **7**, 3297–3305.
- 3 (a) P. C. Hariharan, and J. A. Pople, *Theoret. Chimica Acta*, 1973, **28**, 213-222; (b) M. M. Francl, W. J. Pietro, W. J. Hehre, J. S. Binkley, M. S. Gordon, D. J. De Frees and J. A. Pople, *J. Chem. Phys.* 1982, **77**, 3654-3665.
- 4 M. Römelt, S. Ye and F. Neese, *Inorg. Chem.*, 2009, **48**, 784-785, and references cited.
- 5 F. Neese, *Comput. Mol. Sci.*, 2012, **2**, 73-78.
- 6 (a) A. Schäfer, C. Huber and R. J. Ahlrichs, *Chem. Phys.* 1994, **100**, 5829-5835; (b) F. Neese, *Inorg. Chim. Acta* 2002, **337**, 181-192; (c) S. Sinnecker, L. D. Slep, E. Bill and F. Neese, *Inorg. Chem.* 2005, **44**, 2245-2254.
- 7 (a) R. B. Bedford, P. B. Brenner, E. Carter, J. Clifton, P. M. Cogswell, N. J. Gower, M. F. Haddow, J. N. Harvey, J. A. Kehl, D. M. Murphy, E. C. Neeve, M. L. Neidig, J. Nunn, B. E. R. Snyder and J. Taylor, *Organometallics*, 2014, **33**, 5767–5780; (b) M. Clémancey, T. Cantat, G. Blondin, J.-M. Latour, P. Dorlet and G. Lefèvre, *Inorg. Chem.*, 2017, **56**, 3834-3848; (c) C. Lichtenberg, L. Viciu, M. Adelhardt, J. Sutter, K. Meyer, B. de Bruin and H. Grützmacher, *Angew. Chem. Int. Ed.*, 2015, **54**, 5766–5771; (d) Z. Ouyang, Y. Meng, J. Cheng, J. Xiao, S. Gao and L. Deng, *Organometallics*, 2016, **35**, 1361–1367; (e) C. G. Werncke, P. C. Bunting, C. Duhayon, J. R. Long, S. Bontemps and S. Sabo-Etienne, *Angew. Chem. Int. Ed.*, 2015, **54**, 245–248; (f) M. I. Lipschutz, T. Chantarojsiri, Y. Dong and T. D. Tilley, *J. Am. Chem. Soc.*, 2015, **137**, 6366–6372; (g) M. Pàpai and G. Vankò, *J. Chem. Theor. Comp.*, 2013, **9**, 5004-5020.
